# Supplementary material for: Taxonomic and Functional Microbial Signatures of the Endemic Marine Sponge Arenosclera brasiliensis
Source: PLoS One. 2012 Jul 2;7(7):e39905. doi: 10.1371/journal.pone.0039905 (PMC3388064; doi:10.1371/journal.pone.0039905)
Supplement: Table S1 — Taxonomic profiles for the thirty-one analyzed marine-animal metagenomes. Profiles were derived by BLASTn mapping of sequencing reads to the Genbank NT database and cumulatively summing the reads for higher-order clades (see Materials and Methods). (XLSX) [file pone.0039905.s002.xlsx]

## Sheet: taxonomic_profiles
		4461444.3.21041	aca6bf2e12f401fe3388c7f2650f90b4	da8722cd2afecc9e32ccd53e4bd47606	4461453.3.21050	0d5299fb3abedf1a9712e78846fc5e2f	4461456.3.21053	4461455.3.21052	7b3373b35615e841a8244dfa2c125fee	b054791b3fee8f0f635676dfb03e3a69	4461452.3.21049	73750c6c312da463d113453cbc438474	965b4749f77d484bf5c91431cd4591c7	1495fda0051b8773b3b345d3bc983db5	5e2d8cfc26afc0fbe1bdf93d45358342	9c7f01be738982bfb81c77503496ade9	7565e7fef341d40f22d9c8871f5ee8b5	4453374.3.12981	da5ef3a93d76689ed01bcb60bed5ce00	1e8e7467e02fd44b337b66b212cc0e32	b6d002f7dd77f63626ae4f28679b76cd	6e7777db401340c6b4e94572a1f8206d	a2cde4374a2856547a1faa53be1b9c86	de49cd1c3377de7e33a49f6589b076e1	0e2cb609190cd648c29d36995c6966e9	7495cffd90d804c47665f3726e30e486	d3e58f073c06b19211186ae99e528916	4461454.3.21051	273c9928f718174c20d968352223cd1b	a4ce79e18b1646fe62638d84a9413456	4461451.3.21048	f3b76c2621cacca794f189b745a44a94
NCBI taxonomy ID	Clade name	this_study_Water_JF2	M.Fish_Mor_Gut	M.Whale_Fall_Bone	this_study_Sponge_Ab4	M.Botany_Bay_15	this_study_Sponge_Ab1	this_study_Sponge_Ab2	M.Fish_Mor_Slime	Mussel_gallo_gill	this_study_Sponge_Ab5	V.Fish_Mor_Slime	M.Botany_Bay_01	M.Botany_Bay_02	Mussel_edulis_mantel	Mussel_edulis_foot	M.Botany_Bay_04	this_study_Water_JF1	Mussel_gallo_foot	V.Fish_Heal_Gut	Mussel_edulis_gill	V.Fish_Mor_Gut	M.Fish_Heal_Slime	Mussel_gallo_mantel	V.Fish_Heal_Slim	M.Whale_fall_Mat	Mussel_gallo_digest_gland	this_study_Sponge_Ab3	M.Fish_Heal_Gut	M.Whale_fall_Rib	this_study_Sponge_Ab6	Mussel_gallo_digest_gland
263913	uncultured Erythrobacter sp.	0	0	0	0	0	0	0	0.00392157	0	0	0	0	0	0	0	0	0	0	0	0	0	0	0	0.00540541	0	0	0	0	0	0	0
28801	Centropomus	0	0	0	0	0	0	0	0	0	0	0	0	0	0	0	0	0	0	0	0	0	0	0	4	0	0	0	0	0	0	0
7652	Lytechinus	0	0	0	0	0	0	0	0	0	0.2	0	0	0	0	0	0	0	0	0	0	0	0	0	0	0	0	0	0	0	0.333333	0
312133	uncultured Nectriaceae	0	0	0	0	0	0	0	0	0	0	0	0	0	0	0	0	0	0	0	0	0	0.004	0	0	0	0	0	0	0	0	0
42345	Phoenix dactylifera	0	0	0	0	0	0	0	0	0	0	0	0	0	0	0	0	0	0	0	0	0	1	0	0	0	0	0	0	0	0	0
217164	Caligus	0	0	0	1.33333	1	0	0	0	8.71203	1.36364	0	0.5	0	0.632966	0	0	0.5	5.35314	0	0.887536	0	0	25.826	0	0	3.93647	0.333333	0	0	1	0.519802
227503	Dracunculus vulgaris	0	0	0	0	0	0	0	0	50.1351	0	0	0	0	34.9563	0	0	0	8.28333	0	15.0406	0	0	538.706	0	0	19.75	0	0	0	0	1.83333
153664	Ophiocordyceps sphecocephala	0	0	0	0	0	0	0	0	0	0	0	0	0	0	0	0	0	0	0	0	0	0.0239044	0	0	0	0	0	0	0	0	0
1114432	Naxibacter sp. LC122	0	0.008	0	0	0	0	0	0.008	0	0	0	0	0	0	0	0	0	0	0	0	0	0	0	0	0	0	0	0.004	0	0	0
1086536	Burkholderia sp. PE-ST04	0	0	0	0	0	0	0	0.00395257	0	0	0	0	0	0	0	0	0	0	0	0	0	0	0	0	0	0	0	0	0	0	0
131172	uncultured Roseobacter NAC11-7	0	0	0	0	0	0	0	0	0	0	0	0.909953	0.402895	0	0	0	0	0	0	0	0	0	0	0	0	0	0	0	0	0	0
66271	Pantoea stewartii subsp. stewartii	0	0.5	0	0	0	0	0	0	0	0	0	0	0	0	0	0	0	0	0	0	0	0	0	0	0	0	0	0	0	0	0
291360	Oryzias dancena	0	0	0	0	0	0	0	0	0	0	0	0	0	0	0	0	0	0	0	0	0	0	0	0.504049	0	0	0	0	0	0	0
30266	Spirobolida	0	0	0	0	1	0	0	0	0	0	0	0	0	0	0	0	0	0	0	0	0	0	0	0	0	0	0.125	0	0	0	0
440556	unclassified Gastropoda	0	0	0	0.25	0	0.2	0	0	0	0.2	0	0	0	0	0	0	0	0	0	0	0	0	0	0	0	0	0	0	0	0	0
418435	Lepidochitoninae	0	0	0	0	0	0	0	0	0	0	0	0	0	0	0	0	0	8	0	0	0	0	1	0	0	4	0	0	0	0	0
1125668	Oxalobacteraceae bacterium LC105	0	0.008	0	0	0	0	0	0.008	0	0	0	0	0	0	0	0	0	0	0	0	0	0	0	0	0	0	0	0.004	0	0	0
336810	Candidatus Sulcia muelleri	7.5	0	2.16667	0	15.1667	0	0	0	0	1	0	27.0667	6.66667	0	0	0	9	0	0	0	0	0	0	0	0	0	0	0	4	0	0
645127	Corynebacterium kroppenstedtii DSM 44385	0	0	0	0	0	0	0	0	0	0	0	1	0	0	0	0	0	0	0	0	0	0	0	0	0	0	0	0	0	0	0
43297	Cosmetidae	0	0	0	0	0	0	0	0	0	0.0077821	0	0	0	0	0	0	0	0.010101	0	0	0	0	0	0	0	0	0	0	0	0	0
4893	Saccharomycetaceae	9.625	0	1	10.7081	4.5	12	5.85405	1.5	6.875	8.80837	0	36.4167	3.66667	0	0	0	14.8106	0	0	0	0	0	4	0	2	7	12.5833	0	1	3	0
144708	Bombus	2.2	0	0	6.33333	2	2	8	0.5	9.5	4.33333	0	1.73333	1	0	0	0	3.5	3.75	0	0	0	0	1.5	0	0.666667	8.58333	4	0	0	5.5	2.5
541664	Paenibacillaceae bacterium BF.104	0	0	0	0	0	0	0	0	0	0	0	0	0	0	0	0	0	0	0	0	0	0	0	0.00675676	0	0	0	0.01	0	0	0
40155	Estrildinae	2.5	0	0	20.75	4.2	16.5	29.8167	0	10.9286	11.2833	9.33333	1	0	1.5	0	3	2	4	0	0	0	0.333333	1.5	1.61111	0	8	12.1667	1	0	17.6409	1
583358	Thermoanaerobacter mathranii subsp. mathranii str. A3	0.5	0	0	0	0.611111	0	0	0	0	0	0.25	3.19167	0.1	0	0	0	1	0	0	0	0	0	0	0	0	0	0	0.0207254	1.33333	0	0
1244	Leuconostoc gelidum	0	0.000884956	0	0	0	0	0	0	0	0	0	0	0	0	0	0	0	0	0	0	0	0	0	0	0	0	0	0	0	0	0
1638	Listeria ivanovii	5	0.333333	0	0	0	0	0	1	0	0	0.5	1	0	0	0	0	0.2625	0	0	0	0	0	0	0	0	0	0	0	0	0	0
58095	Salmonella enterica subsp. enterica serovar Agona	0	0.110344	0.087619	0.0654327	1.61907	0.2	0	2.16119	0	0	0.437892	0	0	0	0	0.134387	0.240642	0	0	0.1	0	1.17427	0	0.21453	0.161534	0	0.0434783	0.193848	2.16782	0	0
477983	Paenibacillus sp. PA215	0	0	0	0	0	0	0	0	0	0	0	0	0	0	0	0	0	0	0	0	0	0	0	0.004	0	0	0	0	0	0	0
1052019	Enterobacter sp. C6-8	0	0.004	0	0	0	0	0	0.0117821	0	0	0.004	0	0	0	0	0	0	0	0	0	0	0	0	0	0	0	0	0	0	0	0
410359	Pyrobaculum calidifontis JCM 11548	0	0	0	0	2	0	0	0	0	0	0	0	0	0	0	0	0	0	0	0	0	0	0	0	0	0	0	0	0	0	0
69500	Aplysia cf. juliana	0	0	0	0	0	0	0	0	0	0	0	0	0	0	0	0	0	0.00505051	0	0	0	0	0	0	0	0	0	0	0	0	0
2203	Methanospirillum hungatei	0	0	0	0	0	0	0	0	0	0	0	0	0	0	0	0	0	0	0	0	0	0	0	0	0	0	0	1	3	0	0
40037	Heliconiinae	0	0	0	2	0	0	3.5	0	3.72326	0	0	0	0	0.700415	0	0	1	1.40124	0	0.890738	0	0	9.62034	0	0	1.95157	1.66667	0	0	0	0.10081
359391	Brucella melitensis biovar Abortus 2308	0.140909	0.0434783	1.63499	1.01448	23.6018	0.139423	0.635494	0	0	0.276224	0.0454545	0.405806	0.0555556	0	0	1.25883	0.27595	0	0	0	0	0	0	0	2.34431	0	0.153846	0	1.64979	0	0
266652	Halomonas sp. NT N42	0	0	0	0	0	0	0	0	0	0	0	0	0	0	0	0	0.004	0	0	0	0	0	0	0	0	0	0	0	0	0	0
40253	Brachidontes	0	0	0	3	0	0	1	0	2.23743	0	0	0	0	0.157895	0	0	0	3.0261	0	0.194813	0	0	1.31098	0	0	0.527299	1	0	0	0	0
34821	Sebastes marinus	0	0	0	0	0	0	0	0	0	0	0	0	0	0	0	0	0	0	0	0	0	0	0	0.0282814	0	0	0	0	0	0	0
28828	Solea	0	0	0	0.027027	0	0	2.5	0	56.186	0	1	0	0	11.2391	0.5	0	0	11.4381	0	19.0313	0	0	207.325	3.04714	0	11.6583	1	0	0	0	0.933333
180434	Morganella morganii subsp. morganii	0	0.00107643	0	0	0.0878007	0	0	0.00107411	0	0	0	0	0	0	0	0	0	0	0	0	0	0	0	0	0	0	0	0.00107411	0	0	0
13334	Anaerobiospirillum	0	0.0512793	0	0.00101112	0	0	0	0.00337838	0	0	0	0	0	0	0	0	0	0	0	0	0	0.00335571	0	0	0	0	0	0.0241094	0	0	0
33090	Viridiplantae	262.817	76.6059	13.0469	117.682	196.522	54.798	146.137	126.845	361.942	90.7308	115.667	218.333	17.7519	91.4368	5.83333	15.5	812.768	103.338	8.78205	126.396	11.1635	140.587	1499.86	51.4825	27.3165	116.903	73.7436	96.7474	24.4328	73.6115	18.3248
50339	Thermoplasma volcanium	0	0	0	0	0	0	0	0	0	0	0	0	0	0	0	0	0	0	0	0	0	0	0	0	0	0	0	0	1	0	0
78247	Cloning vector pCMVTAG2b	0	0	0.0679724	0	0	0	0	0	0	0	0	0	0	0	0	0	0	0	0	0	0	0	0	0	0	0	0	0	0.0322581	0	0
933804	Haemadipsa zeylanica agilis	0	0	0	0	0	0	0	0	0	0	0	0	0	0	0	0	0	0.016	0	0	0	0	0	0	0	0	0	0	0	0	0
40117	Nitrospirae	0	0.2	1	5	104.833	0	2	1.50204	0	0	0	17.5	1.5	0	0	6.5	5	0	0	0	0	2	0	1	2	0	2.25	0	5.33333	1	0
118969	Legionellales	15.9952	3.01378	2	10.1071	77.0833	1	13	1.0871	0	4.2	0	73.5536	10.378	0	0	6.83333	28.054	0	0	0	0	0.666667	0	0	8	0	1.6	1.01378	14.2754	5.41026	0
523687	environmental samples	0	0	0	0	2	0	0	0	0	0	0	0	0	0	0	0	0	0	0	0	0	0	0	0	0	0	0	0	0	0	0
660058	Gluconacetobacter hansenii group	0	0	2	0	28.5	0	0	0	0	0	0	0	0	0	0	2	0	0	0	0	0	0	0	0	0	0	0	0	0	0	0
5804	Eimeria maxima	0	0	0	0	0.004	0	0	0	3.85714	0	0	0	0	0	0	0	1	0	0	0	0	0	1.28571	0	0	1	0	0	0	0	0
393456	Rhynchobapta	0	0	0	0	0	0	0	0	0	0	0	3.5	0	0	0	0	0	0	0	0	0	0	0	0	0	0	0	0	0	0	0
330922	Psychrobacter cryohalolentis	2.5	2.01061	2415.05	0.5	16.4167	0	0	2	0	0	0.5	8	2	0	0	0	1.5	0	0	0	0	0	0	0	5.5	0	0	2	174.167	0	0
1036729	Sarocladium bactrocephalum	0	0	0	0	0	0	0	0	0	0	0	0	0	0	0	0	0	0	0	0	0	0.067227	0	0	0	0	0	0	0	0	0
555079	Thermosediminibacter oceani DSM 16646	0	0	0	0	0	0	0	0	0	0	0	0	0	0	0	0	4	0	0	0	0	0	0	0	0	0	0	0	1	0	0
5401	Russulaceae	0	0	0	0	0	0	0	0	0	0.0689655	0	0	0	0	0	0	0	0	0	0	0	0	0	0	0	0	0	0	0	0	0
307055	Cantharidus hirasei	0	0	0	0	0	0	0	0	0	0	0	0	0	0	0	0	0	0	0	0	0	0	0	0	0	0	0.047619	0	0	0	0
650150	Erysipelothrix rhusiopathiae str. Fujisawa	0	0	0	0	1.33333	0	1	0	0	0	0	5	0	0	0	0	1	0	0	0	0	0	0	0	0	0	0	0	3	0	0
118267	mitosporic Saccharomycetales	6.86667	0	0	3	8.8	5	2	2	0.666667	1.40389	0	22.8007	3.5	0	0	1	15.8333	1	0	2	0	0	4	0	1	3	0.111111	0.5	1	2	1
89479	Amentotaxus yunnanensis	0	0	0	0.0472222	0	0	0.0357143	0	0	0	0	0	0	0	0	0	0	0	0	0	0	0	0	0	0	0	0	0	0	0.030303	0
643562	Desulfovibrio aespoeensis Aspo-2	0	0	0	7.83333	31.2	1	4	0	0	0	0	0	0	0	0	1	3.5	0	0	0	0	0	0	0	6	0	1	0	7.5	1	0
341939	Alphalipothrixvirus	0	0	0	0	0	0	0	0	0	0	0	0	0	0	0	0	0	0	0	0	0	0	0	0	1	0	0	0	0	0	0
1203	Scytonema	0	0	0	0	0	0	0	0	0	0	0	0	0	0	0	0	0	0	0	0	0	0	0	0	0	0	0	1	0	0	0
1107316	Neisseria sp. 6332	0	0	0	0.00101112	0	0	0	0	0	0	0	0	0	0	0	0	0	0	0	0	0	0	0	0	0	0	0	0	0	0	0
4429	Nelumbonaceae	0	0	0	0	0	0	0	0	0	0	0	0	0	1	0	0	0	0	0	0	0	0	3	0	0	0	0	0	0	0	0
452637	Opitutus terrae PB90-1	1.5	0	2	4.5	215.778	4	6	0	0	1	1	12	0	0	0	9.5	10.5	0	0	0	0	1	0	1.25	26.8333	0	2.5	0.333333	2	0	0
1354	Enterococcus hirae	0	0	0	0	0	0	0	0	0	0	0	0	0	0	0	0	4	0	0	0	0	0	0	0	0	0	0	0	0	0	0
10390	Gallid herpesvirus 2	0	0	0	0	1	0	0	0	0	0	0	0	0	0	0	0	0	0	0	0	0	0	0	0	0	0	0	0	0	0	0
73140	Shewanella sp. Ac10	0	0	0	0	0	0	0	0	0	0	0	0	0	0	0	0	0.333333	0	0	0	0	0	0	0	0	0	0	0	0	0	0
83655	Leclercia adecarboxylata	0	0.0548048	0	0	0	0	0	0.0277778	0	0	0.027027	0	0	0	0	0	0	0	0	0	0	0.0555556	0	0	0	0	0	0	0	0	0
47526	Unionidae	1	0	0	1	0	1	3	0	2	5	0	2	0	0	0	0	0	0	0	0	0	0	3	0	0	7	1.00855	0	0	0	1
359917	Paenibacillus sepulcri	0	0	0	0	0	0	0	0	0	0	0	0	0	0	0	0	0	0	0	0	0	0	0	0.004	0	0	0	0	0	0	0
1008460	Pyrococcus yayanosii	0	0	0	0	0	0	0	0	0	0	0	0	0	0	0	0	0.0909091	0	0	0	0	0	0	0	0	0	0	0	0	0	0
308604	Diphasia fallax	0.5	0	0	0	0	0	0	0	0	0	0	0	0	0	0	0	0	0	0	0	0	0	0	0	0	0	0	0	0	0	0
1052597	Cloning vector EN.CFP	0	0	0	0	0.004	0	0	0	0	0	0.004	0	0	0	0	0	0	0	0	0	0.004	0	0	0	0	0	0	0	0	0	0
251221	Gloeobacter violaceus PCC 7421	2	0	0	12.4	11.25	1	7.83333	0	0	4	1	0	0	0	0	0	1	0	0	0	0	0	0	0	2.5	0	1.56667	0	2	6.7	0
442153	Cloning vector pET21b+PA	0	0	0	0	0.004	0	0	0	0	0	0	0	0	0	0	0	0	0	0	0	0	0	0	0	0	0	0	0	0	0	0
127505	Cloning vector pBS152v	0	0	0	0	0.004	0	0	0	0	0	0	0	0	0	0	0	0	0	0	0	0	0	0	0	0	0	0	0	0	0	0
50642	Leptoceridae	0	0	0	0	0	0	0	0	0	0	0	1	0	0	0	0	1	0	0	0	0	0	0	0	0	0	0	0	0	0	0
555778	Halothiobacillus neapolitanus c2	2	2.97619	0	19	61.25	5	12	7	0	7.8	3.7	7.5	0	0	0	1.66667	1	0	0	0	0	1.5	0	2.5	4.16667	0	2	4.66667	7	5.5	0
517755	Xanthomonas dyei pv. dysoxyli	0	0	0	0	0	0	0	0	0	0	0	0	0	0	0	0	0.008	0	0	0	0	0	0	0	0	0	0	0	0	0	0
282461	Bathypecten	0	0	0	0	0	0	0	0	0.00699301	0	0	0	0	0	0	0	0	0.008	0	0	0	0	0	0	0	0	0	0	0	0	0
107843	Hydroporinae	0	0	0	0	0	0	0	0	0	0	0	1	0	0	0	0	0	0	0	0	0	0	0	0	0	0	0	0	0	0	0
314522	Gonothyraea loveni	0	0	0	0	0	0	0	0	0	0	0	0	0	0	0	0	0	0	0	0	0	0	0	0	0	0.5	0	0	0	0	0
1090390	Burkholderia sp. OL655B	0	0	0	0	0	0	0	0.00395257	0	0	0	0	0	0	0	0	0	0	0	0	0	0.00395257	0	0	0	0	0	0	0	0	0
285892	unclassified Rhodobacterales	0	0	1.03846	0	2	0	0	0	0	0	0	0	0	0	0	0	0	0	0	0	0	0	0	0	0	0	0	0	0	0	0
193206	Membraniporoidea	0	0	0	0	0	0	0	0	0	0.0307692	0	0	0	0	0	0	0	0	0	0	0	0	0	0	0	0	0.00854701	0	0	0.0606618	0
27834	Nippostrongylus	0	0	0	2	0	0	0	0	0	0.5	0	0	0	0	0	0	0	0	0	0	0	0	0	0	0	0	0.0042735	0	0	0	0
327987	unclassified Ranavirus	0	0	0	0	0.2	0	0	0	0	0	0	0	0	0	0	0	0	0	0	0	0	0	0	0	0	0	0	0	0	0	0
145657	unknown marine alpha proteobacterium JP88.1	0	0	0	0	0	0	0	0	0	0	0	0	0	0	0	0	1	0	0	0	0	0	0	0	0	0	0	0	0	0	0
993599	Leptochiton vietnamensis	0	0	0	0	0	0	0	0	0	0	0	0	0	0	0	0	0	0.048	0	0	0	0	0	0	0	0	0	0	0	0	0
102670	Mytilus sp. NZ1	0	0	0	0	0	0	0	0	0.0747532	0	0	0	0	0	0	0	0	0.154933	0	0	0	0	0.0266127	0	0	0.0511364	0	0	0	0	0
28829	Solea senegalensis	0	0	0	0.027027	0	0	2.5	0	56.186	0	1	0	0	11.2391	0.5	0	0	11.4381	0	19.0313	0	0	207.325	3.04714	0	11.6583	1	0	0	0	0.933333
523774	Carinina	0	0	0	0	0	0	0	0	0	0.00389105	0	0	0	0	0	0	0	0	0	0	0	0	0	0	0	0	0	0	0	0	0
317312	Cyclorana	0	0	0	2	0	0	0	0	0	0	0	0	0	0	0	0	0	0	0	0	0	0	0	0	0	0	0	0	0	0.5	0
178837	Halocypridina	0	0	0	0	0	0	0	0	0	0	0	0	0	0	0	0	0	0.008	0	0	0	0	0	0	0	0	0	0	0	0	0
591011	Neurospora expression vector pCCG::N-GFP	0	0	0	0	0	0	0	0	0	0	0	0	0	0	0	0	0	0	0	0	0	0.030303	0	0	0	0	0	0	0	0	0
6578	Pecten	0	0	0	0	0	0	0	0	0	0	0	0	0	0	0	0	0	0	0	1	0	0	1	0	0	0	0	0	0	0	0
526418	Crinocheta	0	0	0	1	0	0	1	0	1	0	0	0	0	0	0	0	0	2	0	0	0	0	0	0	0	0	0.047619	0	0	0	0
29187	Elphidium	0	0	0	0	0	0	0	0	0	0	0	0	0	0	0	0	0	0	0	0	0	0	0	0	0	0	0.904762	0	0	0	0
228405	Hyphomonas neptunium ATCC 15444	6	0	91.8333	1.83333	114.104	0	4.5	0	0	3	0	8.7	2	0	0	3.5	34.8333	0	0	0	0	0	0	0	463.333	0	1.5	0	764	1	0
476528	Bibersteinia	0	0	0	0	0	0	0	0	0	0	0	1	0	0	0	0	0	0	0	0	0	0	0	0	0	0	0	0	0	0	0
322455	Aliatypus	0	0	0	0	0	0	0	0	2	0	0	0	0	0	0	0	0	5	0	0	0	0	0	0	0	4	0	0	0	0	1
863977	Chilon	0	0	0	0	0	0	0	0	0	0	0	0	0	0	0	0	0	0.00505051	0	0	0	0	0	0	0	0	0	0	0	0	0
82587	Saturniinae	0	0	0	0	0	0	0	0	3	0	0	0	0	0	0	0	0	2	0	0	0	0	0	0	0	8	0	0	0	0	1
326294	uncultured Curvibacter sp.	0	0.004	0	0	0	0	0	0	0	0	0	0	0	0	0	0	0	0	0	0	0	0.004	0	0	0	0	0	0	0	0	0
725113	Oweniida	0	0	0	0	0	0	0	0	0	0	0	0	0	0	0	0	0	0.024	0	0	0	0	0	0	0	0	0	0	0	0	0
666021	Mesorhizobium sp. STM4912	0	0	0	1	0	0	0.5	0	0	0.25	0	0	0	0	0	0	0	0	0	0	0	0	0	0	0	0	0	0	0	0.5	0
948199	bacterium MCF28(2011)	0	0.004	0	0	0	0	0	0	0	0	0	0	0	0	0	0	0	0	0	0	0	0	0	0	0	0	0	0	0	0	0
520461	Brucella pinnipedialis B2/94	0.05	0.0434783	1.30165	1.08115	40.3526	0.139423	0.70216	0	0	0.34289	0.0454545	1.51692	1.13248	0	0	2.84766	1.38706	0	0	0	0	0	0	0	4.58013	0	0.153846	0	2.34423	0.125	0
268500	Hyblaeidae	0	0	0	0	0	0	0	0	0	0	0	0	0	0	0	0	0	0	0	0	0	0	0	0	0	0	1	0	0	0.5	0
66969	Legionella waltersii	0	0	0	0	0	0	0	0	0	0	0	1	0	0	0	0	0	0	0	0	0	0	0	0	0	0	0	0	0	0	0
7514	Ctenocephalides	0	0	0	0	0	0	0	0	0	0	0	0	0	0	0	0	0	0	0	0	0	0	0	0	0	1	0.00854701	0	0	0	0
39	Cystobacteraceae	1	0	4	1	21.5	2	4.47619	0	0	2.5	0	0.5	0	0	0	2	9.86667	0	0	0	0	0	0	0	2.5	0	6	0	7	0	0
937012	gamma proteobacterium PM32	0	0	0	0	0	0	0.00943396	0	0	0	0	0	0	0	0	0	0	0	0	0	0	0	0	0	0	0	0	0	0	0	0
51025	Oxyuroidea	0	0	0	0	0	0	0	0	0	0	0	0	0	0	0	0	0	0	0	0	0	0	0	0	0	0	0.00854701	0	0	0	0
189778	Nitrospirales	0	0.2	1	5	104.833	0	2	1.50204	0	0	0	17.5	1.5	0	0	6.5	5	0	0	0	0	2	0	1	2	0	2.25	0	5.33333	1	0
405416	Acinetobacter baumannii ACICU	0.125	0.0159151	1.5	0	0.608333	0	0	0.4	0	0	0	1.64405	0.0909091	0	0	0	0.658333	0	0	0	0	0.211111	0	0	0.20202	0	0	0.0143541	0.75	0	0
200806	Plagiobryum cyclophyllum	0	0	0	0	0	0	0	0	0	0	0	0	0	0	0	0	0	0	0	0	0	0	0	0	0	0	0	0	0	0.00961539	0
82301	Wolbachia endosymbiont of Dirofilaria immitis	0	0	0	0	0	0	0	0	0	0	0	0	0	0	0	0	0	0	0	0	0	0	0	0	1	0	0	0	0	0	0
232955	Chama florida	0	0	0	0	0	0	1	0	0	1.03571	0	0	0	0	0	0	0	0	0	0	0	0	0	0	0	0	0	0	0	1	0
257363	Rickettsia typhi str. Wilmington	1	0	0	0.00323625	4.25	0	0	0	0	0	0	10.2778	1.33333	0	0	0	4.33333	0	0	0	0	0	0	0	0	0	0	0	0	0	0
8091	Scorpaeniformes	0	0	0	5	0	0	2.33333	7	2	2	6.11012	0	0	0	0	0	0	9	0	0	0	1.45	0.25	64.9794	0	3	2	0	0	0	0
667718	Binary vector pEAQexpress	0	0	0	0	0	0	0	0.00204499	0	0	0	0	0	0	0	0	0	0	0	0	0	0	0	0	0	0	0	0	0	0	0
4570	Triticum timopheevii	0	0	0	0.0120482	0	0	0	0	0	0	0	0	0	0	0	0	0	0	0	0	0	0	0	0	0	0	0	0	0	0.012987	0
44249	Paenibacillus	2.75	434.402	1.33333	4.16667	32.6833	2	1	851.099	0	2	245.547	7	1.5	0	0	0	11.6	0	0	0	0	430.308	0	81.3816	11	0	0	258.952	8.9	1	0
2350	Haliscomenobacter hydrossis	2.33333	0	3.5	2	19.0833	0	2	0	0	0	0	29.5	3	0	0	1	14	0	0	0	0	0	0	0	41.5833	0	0	0	10.3333	0	0
115555	Halomonas axialensis	0.666667	0	0	0	0	0	0	0	0	0	0	0	0	0	0	0	0.016	0	0	0	0	0	0	0	0	0	0	0	0	0	0
104715	Euclymene trinalis	0	0	0	0	0	0	0	0	0	0	0	0	0	0	0	0	0	0.00505051	0	0	0	0	0	0	0	0	0	0	0	0	0
1		8547	26701.8	24667	6956.98	81784	2289	7134	23857.5	9534	4239	22660	35317	7635	12661	16827	6496	23509	8851	78	23371	124	20072.8	23900	17878.9	15927	7003	3154	22671.8	17053	3422	324
506		13.75	97.8239	40.2167	154.933	440.965	26.75	98.0417	112.185	0	46.3333	76.442	56.2512	4.56689	0	0	23	31.1667	0	0	0	0	71.1638	0	48.9854	60.7583	0	33.9333	91.8427	54.8333	59.3714	0
1047778		0	0	0	0	0	0	0	0	0	0	0.004	0	0	0	0	0	0	0	0	0	0	0	0	0	0	0	0	0	0	0	0
28181		0	0	3.5	0	51	0	0	0	0	0	0	0	0	0	0	1	0	0	0	0	0	0	0	0	1	0	0	0	19	0	0
1043696		0	0	0	0	0	0	0	0	0	0	0.004	0	0	0	0	0	0	0	0	0	0.004	0	0	0	0	0	0	0	0	0	0
31031		0.695238	0	0	6	9.2	3	8.94595	0.666667	907.548	11.85	36.3571	2	0	5325.07	8139.45	6	1.5	1755.01	0	11280.6	0	9	7675.86	121.155	0	999.898	10.5	0	0	8.03448	0.648373
884227		0	0	0	0	0	0	0	0	0	0	0	0	0	0	0	0	0	0	0	0	0	0	0	0	0	0.004	0	0	0	0	0
8100		0	0	0	4	0	0	1	0	0	2	0.110119	0	0	0	0	0	0	0	0	0	0	0.45	0	16.0986	0	0	2	0	0	0	0
228252		0	0	0	0	0	0	0	0	0	0	0.333333	0	0	0	0	0	0	0	0	0	0	0	0	1.33333	0	0	0	0	0	0	0
285181		0	0	0	0	1	0	0	0	0	0	0	0	0	0	0	0	0	0	0	0	0	0	0	0	0	0	0	0	0	0	0
619695		0	0	0	0	0	0	0	0	0	0	0	0	0	0	0	0	0	0	0	0	0	0	0	0	0	0.004	0	0	0	0	0
542369		3	0	0	0	0	0	0	0	0	0	0	13.6667	1.5	0	0	0	5.33333	0	0	0	0	0	0	0	0	0	0	0	0	0	0
657313		0	1.00088	0	0	0	0	0	1	0	0	0	1	0	0	0	0	0	0	0	0	0	0.00595238	0	0	0	0	0	0.00595238	3.33333	0	0
29164		0	0	0	0	0	0	0	0	0	0	0	0	0	0	0	0	0	0.032	0	0	0	0	0	0	0	0	0	0	0	0	0
1085639		0	0	0	0	0	0	0	0.00390625	0	0	0.004	0	0	0	0	0	0	0	0	0	0	0.004	0	0	0	0	0	0	0	0	0
226076		0	0	0	0	0	0	0	0	0	0	0	0	0	0	0	0	0	0.0084843	0	0	0	0	0.004	0	0	0	0	0	0	0	0
269483		1	9.13817	2.33333	7.86454	26.8782	6.66667	2.225	7.51735	0	0	15.4778	1.75	1.5	0	0	2.5	0.666667	0	0	0	0	4.26568	0	9.75305	4.1	0	2.7	16.8312	2	2.5	0
147700		0	0	0	0	0.822222	0	0	0	0	0	0	0	0	0	0	0	0	0	0	0	0	0	0	0	0	0	0	0	0	0	0
111504		0	0	0	0	0	0	0	0	0	0	0	1	0	0	0	0	0	0	0	0	0	0	0	0	0	0	0	0	0	0	0
1517		2.5	1.00442	2	0	1.5	0	0	0.530303	0	0	0	3.9	1.1	0	0	0.5	0.5	0	0	0	0	0.0637755	0	0	0	0	0	0.0556686	3	0	0
268748		1.66667	0	0	0	0	0	0	0	0	0	0	0	0	0	0	0	16	0	0	0	0	0	0	0	0	0	0	0	0	0	0
57062		0	0	0	0	0	0	0	0	1	0	0	0	0	0	0	0	0	0	0	0	0	0	0	0	0	0	0	0	0	0	0
272634		0	0	0	0	0.25	0	0	0	0	0	0.6	0	0	0	0	0	0	0	1.8	0	0.6	0.2	0	0	0	0	0	0	0	0	0
67799		4	0	3	0	13.5	0	0	0	0	0	0	17.5	4	0	0	0	8	0	0	0	0	0	0	0	2.5	0	0	0	10	0	0
57739		0	0	0	0	0	0	0	0	0	0	0	0	0	0	0	0	0	0	0	0	0	0	0	0	0.5	0	0	0	0	0	0
128489		0	0	0	0	0	0	0	0	0	0	0	0	0	0	0	0	0	0.016	0	0	0	0	0	0	0	0	0	0	0	0	0
96476		1	0	0	0.00323625	0	0	0	0	0	0	0	0	0	0	0	0	0	0	0	0	0	0	0	0	0	0	0	0	0	0	0
121871		0	0	0	0	4.5	0	0	0	0	1	0	0	0	0	0	0	1	0	0	0	0	0	0	0	1	0	0	0	1	0	0
4827		0	0	0	1	0	0	1	0	0	2	0	0	0	0	0	1	0	0	0	0	0	0	0	0	0	0	0	0	0	2	0
202907		0	198.33	5.5	59.0677	99.25	5	31.3333	155.411	0	14.7333	139.337	8.83333	0	0	0	6	1.33333	0	0	0	0	115.127	0	79.1452	10.5	0	13.5	174.524	17.1984	13.25	0
13196		0	0	0	0.6	0	0	0	0	0	0	0	0	0	0	0	0	0	0	0	0	0	0	0	0	0	0	0	0	0	0	0
8711		0	8.11111	0	0.00507614	0	0	0.04	6.5	0	0	5	0	0	0	0	0	0	0	13.5	0	12.5	10.5	0	5	0	0	0	8.80952	0	0	0
44169		0	0	0	2.5	0	2.5	2	0	0	3.5	0	0	0	0	0	0	0	0	0	0	0	0	0	0	0	0	1.5	0	0	2	0
123369		17.6952	1	1	80.8268	29.3899	25.6667	96.5149	52.6667	992.194	86.1554	3616.77	5.19048	0	5341.61	8139.95	14.75	7.5	1791.79	2	11308.7	14	507.25	7930.01	5602.06	1	1026.69	45.1333	0	2.33333	41.8393	2.12131
863987		0	0	0	0	0	0	0	0	0	0.00389105	0	0	0	0	0	0	0	0	0	0	0	0	0	0	0	0	0	0	0	0	0
102890		0	0	0	0.25	0	0	0	0	0	0.25	0	0	0	0	0	0	0	0	0	0	0	0	0	0	0	0	0	0	0	0.25	0
186774		0	0	0	0	0	0	0	0	0.025	0	0	0	0	0	0	0	0	0	0	0	0	0	0	0	0	0	0	0	0	0	0
181423		0	0	0	0	0	0	0	0	0	0	0	0	0	0	0	0	0	0	0	0	0	1	0	0	0	0	0	0	0	0	0
283399		0	0	0	2	0	1.5	3.56667	0	0	2	0	0	0	0	0	0	0	0	0	0	0	0	0	0	0	0	4.83333	0	0	5.5	0
5671		0.361905	0	0	0.0300752	0.166667	0	0	1.25	0	0	0	0	0	0	0	0	0	0	0	0	0	0	0	0	0.666667	0	0	0	0	0	0
97161		0	0	0	0	0.166667	0	0	0	0	0	0	0	0	0	0	0	0	0	0	0	0	0	0	0	0	0	0	0	0	0	0
903510		0	2.00603	4	6.5	22.9167	2	10.066	0.00602928	0	3	1	2.5	0	0	0	4	10.6111	0	0	0	0	0	0	0	2	0	2	3.00603	21.2917	1	0
188476		0	0	0	0	0	0	0.5	0	0	0	0	0	0	0	0	0	0	0	0	0	0	0	0	0	0	0	0	0	0	0	0
990317		0	0	0.5	0	0	0	0	0	0	0	0	0.583333	0.25	0	0	0	0.2	0	0	0	0	0	0	0	0	0	0	0	0.666667	0	0
205920		2	0	0	0	3	0	0	0	0	0	0	9.5	1	0	0	0	5.5	0	0	0	0	0	0	0	0	0	0	0	0	0	0
20		2	2	17.5	8.00971	155	1	15.1667	4	0	1	3	6.5	0	0	0	9.25	5.66667	0	0	0	0	1	0	1	29	0	4	3	16.8333	9.5	0
537217		0	0	0	0	0	0	0	0	0	0	0	0	0	0	0	0	0	0	0	0	0	0	0	0	0	0	0	0.5	0	0	0
160808		0	2	1.16667	9.79167	70.3333	1.83333	2.33333	1	0	0	0	1.66667	1	0	0	4.33333	0	0	0	0	0	0.5	0	0	5.7	0	2.93333	1	1.33333	4	0
937661		0	0.00795257	0	0	0	0	0	0.0159051	0	0	0.00790514	0	0	0	0	0	0	0	0	0	0	0.019764	0	0	0	0	0	0.0118588	0	0	0
574556		0	0	0	0.00323625	0	0	0	0	0	0	0	0	0	0	0	0	1	0	0	0	0	0	0	0	0	0	0	0	0	0	0
1009016		0	0.00396825	0	0	0	0	0	0.004	0	0	0	0	0	0	0	0	0	0	0	0	0	0	0	0	0	0	0	0	0	0	0
763120		0	0	0	0.25	0	0.2	0	0	0	0.2	0	0	0	0	0	0	0	0	0	0	0	0	0	0	0	0	0	0	0	0	0
468		21.4955	10.7082	4320.01	2.16667	97.1407	0	1.33333	18.4414	0	4	12.7842	92.25	15.5789	0	0	8.12162	36.5556	0	0	0	0	15.1641	0	6.90289	32.103	0	2	18.0935	336.667	1.16667	0
117893		0	0	0	0	0	0	1	0	0	1	0	0	0	0	0	0	0	0	0	0	0	0	0	0.00555556	0	2	0	0	0	0	0
620736		0	0	0	0	0	0	0	0	0	0	0	0	0	0	0	0	0	0.016	0	0	0	0	0	0	0	0	0	0	0	0	0
870583		0	0	0	0	0	0	0	0	0	0	0	0	0	0	0	0	0	0.00505051	0	0	0	0	0	0	0	0	0	0	0	0	0
413		1	1	2	32.3167	261.417	3.5	25	0.5	0	15.7667	0	4.5	0	0	0	7	5.83333	0	0	0	0	1	0	0	7.5	0	8.33333	0	10.3333	7.03333	0
294		13.0476	38.6538	111.51	37.35	430.173	3	31.95	25.3606	0	18.369	17.704	33.7167	1	0	0	14.5531	23.0833	0	0	0	0	16.3006	0	13	54.7	0	13.9167	30.5	113.933	18.2436	0
291990		0	0	0	0	0	0	0	0	0	0	0	0	0	0	0	0	4	0	0	0	0	0	0	0	0	0	0	0	1	0	0
63121		0.5	0	0	1	0	3	0	0	0	0.5	0	0	0	0	0	0	0	0	0	0	0	0	0	0.00555556	0	0	0.25	0	0	0	0
196023		2.33333	9	4	5.66667	108.615	2.5	4.00833	4	0	1.83333	6.5	5.5	0.5	0	0	6.25	3.75	0	0	0	0	3	0	1.7	4	0	6.16667	5.31111	10.3167	1.5	0
57977		0	0	0	0	0	0	0	0	0	0	0	0	0	0	0	0	0	0	0	0	0	0	0	0.00555556	0	0	0	0	0	0	0
38832		98.25	0	1	3	20.8333	2	11.6667	1	0	4	0	5.75	2	0	0	3	535.133	0	0	0	0	1	0	0	1.44444	0	6	0	0	11	0
7634		0	0	0	1.52703	0	0	0	0	0	0	0	0	0	0	0	0	0	0	0	0	0	0	0	0	0	0.5	0	0	0	0	0
158756		0	0	0	0	0	0	0	0	0	0	0	2.5	2	0	0	0	0	0	0	0	0	0	0	0	0	0	0	0	0	0	0
351745		0.5	0.2	8.41667	0	6.54762	0	2.125	0.00925926	0	0	0	6.98118	0.333333	0	0	0.404762	6.33333	0	0	0	0	0	0	0	4.11905	0	0	0	20.25	0	0
710994		0	0	0	0.00323625	0	0	0	0	0	0	0	0	0	0	0	0	0	0	0	0	0	0	0	0	0	0	0	0	0	0	0
417127		26.5	0	368.833	0	9.83333	4	2	0	0	1	0	241.878	24.1667	0	0	0	41.1667	0	0	0	0	0	0	0	39	0	2	0	39.3333	0	0
542444		3	0	0	0	0	0	0	0	0	0	0	26	5	0	0	0	1	0	0	0	0	0	0	0	2	0	0	0	1	0	0
59237		0	0	0	0	0	0	0	0	0	0	0	0	0	0	0	0	0	0	0	0	0	0	0	0	0	0	0.204274	0	0	0	0
36211		0	0	0	0	0	0	0	0	0	0	0	0	0	0	0	0	0	0	0	0	0	0	0	2	0	0	0	0	0	0	0
1076194		0	0	0	0	0	0	0	0	0	0	0	0	0	0	0	0	0	0.016	0	0	0	0	0	0	0	0	0	0	0	0	0
260337		0	0	0	0	0	0	0	0	0	0	0	0	0	0	0	0	0	0	0	0	0	0	0	0.0625	0	0	0	0	0	0	0
182752		0	0	0	0	0	0	0	0	0	0	0	0	0	0	0	0	0	10.7786	0	0	0	0	1.29545	0	0	1.33919	0	0	0	0	0.333333
7777		0	0	0	0.5	0	0	2	0	3.66852	1.16667	0	0	0	0.799817	0	0	0	0.0932343	0	0.693768	0	0	4.2011	2.03333	0	3.5099	0	0	0	0	0.00990099
40092		0	0	0	0	0	0	0	0	0	0	0	0.5	0	0	0	0	0	0	0	0	0	0	0	0	0	0	0	0	0	0	0
593904		0	0.00101317	0	0.00101112	0	0	0	0.00219206	0	0	0	0	0	0	0	0	0	0	0	0	0	0	0	0	0	0	0	0	0	0	0
929439		1.14286	0	0	2.03008	1.08333	0	0	0	0	1	0	0	0	0	0	2	1.5	0	0	0	0	0	0	0	0	0	0	0	0	0	0
303379		0	79.1662	1	2.87394	32.5	1	5.5	107.238	0	4.66667	58.337	3.5	2	0	0	7.5	1	0	0	0	0	37.3693	0	31.6523	5	0	2.66667	121.399	15	3.5	0
204037		5	67.7139	5.04	25.5402	136.667	3.83333	25.8667	74.1089	0	6.45952	38.5833	10.009	1	0	0	2	8.5	0	0	0	0	34.5757	0	23.1508	8	0	9.45455	56.9729	30.6667	12	0
112		21.75	0	8	23.5	150.333	1	14.5	3.5	0	2	0	129.667	17.1667	0	0	10.5	54.3333	0	0	0	0	0	0	0	50.4333	0	13	0	19.0833	4	0
580332		0	2.3148	1	38.6429	76.75	9.5	22.9167	5.47368	0	11	1.07413	8.55	0.5	0	0	1.5	2.33333	0	0	0	0	4.10801	0	5.21696	4	0	12.2833	5.40035	7.53333	8.05556	0
526674		0	0	0	0.00323625	0	0	0	0	0	0	0	2.5	0	0	0	0	0	0	0	0	0	0	0	0	0	0	0	0	0	0	0
104099		0	0	0	0	0	0	0	0	0	0	0	0	0	0	0	0	0	0	0	0	0	0	0	0	0.111111	0	0	0	0	0	0
85072		2	3	5	52.8929	264.645	8	27	0	0	19.1667	2	10.6667	1	0	0	17.3768	14.9	0	0	0	0	1.25	0	0	10	0	13.5	3.5	17.45	16.2	0
243231		0	0	1.5	0	12	0	0.333333	0.5	0	0	0.5	0	0	0	0	1	2.36667	0	0	0	0	0	0	0	2	0	0	0	3	0	0
160263		0	0	0	0	0.004	0	0	0.00840336	0	0	0	0	0	0	0	0	0	0	0	0	0	0	0	0	0	0	0	0	0	0	0
9935		0	0	0	1.5	0	0	3.16667	0	0	0.00766284	0	0	0	0	0	0	0	0.0833333	0	0	0	0	0	0	0.111111	0	1	0	0	1.7	0
42211		0	0	0	0	0.004	0	0	0	0	0	0	0	0	0	0	0	0	0	0	0	0	0	0	0	0	0	0	0	0	0	0
378358		0	0	0	0	0	0	0	0	0.00699301	0	0	0	0	0	0	0	0	0.008	0	0	0	0	0	0	0	0	0	0	0	0	0
102633		0	0	0	0	0	0	0	0	0.0395725	0	0	0	0	0	0	0	0	0.392654	0	0.00980392	0	0	0.0105359	0	0	0.0648063	1	0	0	0	0
619636		0	0	0	0	0	0	0	0	0	0	0	0	0	0	0	0	0.25	0	0	0	0	0	0	0	0	0	0	0	0	0	0
204773		0	79.1383	1	2.87394	32.5	1	5.5	107.174	0	4.66667	58.337	3.5	2	0	0	7.5	1	0	0	0	0	37.3613	0	31.6484	5	0	2.66667	121.399	15	3.5	0
542		5.67692	0	14.5	2.03236	61.1462	0	1	1.70833	0	0	0	24.8333	1	0	0	2	2.5	0	0	0	0	1.6	0	0	14.1667	0	0	1	4.75	1	0
3114		0	0	0	0	0	0	0	0	0	1	0	0	0	0	0	0	0	0	0	0	0	0	0	0	0	0	0	0	0	0	0
3750		0	0	0	1	0	0	0	0	2.11018	1	0	0	0	0.13315	0	0	0	1.5099	0	1.0271	0	0	5.27491	0	0	0.00990099	0	0	0	0	0.0765677
401862		0	0	0	0	0	0	0	0	0	0	0	0	0	0	0	0	0	0.486154	0	0	0	0	0	0	0	0.052	0	0	0	0	0
130631		0	0	0	0	0	0	0	0	0	0	0	0	0	0	0	0	0	0	0	0	0	0	0	0	0	0	0.0434783	0	0	0	0
9255		1.5	0	0	10.5833	6.5	4.33333	19.2679	0	2.02083	10	2.5	1	0	0	0	1	1	1	0	0	0	0	0.5	2	0	1.33333	5.64286	0	1	8.5	0
635013		0	0	0	0.00970874	5.5	0	0	0.5	0	0	0	0	1	0	0	0	4	0	0	0	0	0	0	0	0	0	0	0	2	0	0
35218		0	0	0	0	0	0	1	0	0	0	0	0	0	0	0	0	0	0	0	0	0	0	0	0	0	0	0	0	0	0	0
35356		0	0	0	0	0.004	0	0	0	0	0	0	0.342593	0	0	0	0	0	0	0	0	0	0	0	0	0	0	0	0	0	0	0
880533		0	0	0	0	0	0	0	0	0	0	0	1	0	0	0	0	0	0	0	0	0	0	0	0	0	0	0	0	0	0	0
170		0.6	0	0	2	15.6	0	0	1	0	0	0	26.4667	3	0	0	3	9	0	0	0	0	0	0	0	8	0	0	0	8.75	0	0
335492		0	0	0	0	0	0	0	0	0	0.0181818	0	0	0	0	0	0	0	0	0	0	0	0	0	0	0	0	0	0	0	0	0
30319		3	0.5	1	58.4354	21.8333	30.2222	68.5791	0.00204499	51.4701	48.5659	13.0794	7.33333	2	0.499817	1	2.5	3.90476	22.1028	0	4.56043	0	1	44.3027	5.03889	1.33333	28.1034	40.3333	2	2	33.1273	2.5099
123899		0	0	0	1	0	1	1.5	0	0	1	0	0	0	0	0	0	0	0	0	0	0	0	0	0	0	0	0	0	0	1	0
69293		0	1	0	5.50508	0	2	5.50746	5	2	4	85.3333	0	0	0	0	0	1	6	0	0	1	12.5	0	149.433	0	0.5	1	0	0	1.5	0
166333		0	0	0	9	0	3	10.5	0	0	3	0	0	0	0	0	0	0	0	0	0	0	0	0	0	0	0	4	0	0	9.5	0
1002576		0	0	0	0	0	0	0	0	0	0	0	0	0	0	0	0	0	0	0	0	0	0.00395257	0	0	0	0	0	0	0	0	0
423539		0	5.11275	0	0	0	0	0	7.65331	0	0	2.81396	0	0	0	0	0	0	0	0	0	0	3.84085	0	0.484758	0	0	0	2.33469	0	0	0
6218		0	0	0	2	0	0	0	0	9.5	0.0155642	0	0	0	1	0	0	0	9.18	0	1	0	0	1	0	0	3	0.5	0	0	0	1.5
864021		0	0	0	0	0	0	0	0	0	0.00389105	0	0	0	0	0	0	0	0.00505051	0	0	0	0	0	0	0	0	0	0	0	0	0
442429		0	0	0	0	0	0	0	0	0	0	0	0	0	0	0	0	0	0	0	0	0	0	0	0	0	0	0	0	0.2	0	0
88315		0	0	0	0	0	0	1	0	0	0	0	0	0	0	0	0	0	0	0	0	0	0	0	0	0	0	0	0	0	0	0
212251		0	0	0	0	0	0	0	0	0	0.00389105	0	0	0	0	0	0	0	0	0	0	0	0	0	0	0	0	0	0	0	0	0
585057		0	0.47126	0.0537037	0.692099	0.693042	0	0	2.30876	0	0.514925	0.0625	0.333333	0	0	0	0	0.0322581	0	0	0.0588235	0	0.0268312	0	0.385452	0.603768	0	0	1.06718	0.0918284	0.0526316	0
248765		0	0	0	0	0	0	0	0	0	0	0	0	0	0	0	0	0	0	0	0	0	0	0	0.00555556	0	0	0	0	0	0	0
317944		0	0	0	0	0	0	0	0	1	0	0	0	0	0	0	0	0	0	0	0	0	0	2	0	0	2	0	0	0	0	0
621459		0	0	0	0	0	0	0	0	0	0	0	0	0	0	0	0	0	0	0	0	0	0	0	0.00976287	0	0	0	0	0	0	0
131688		0	0	0	0	0	0	0	0	0	0	0	0	0	0	0	0	1	0	0	0	0	0	0	0	0	0	0	0	0	0	0
6997		0	0	0	0	0	0	0	0	1	0	0	0	0	0	0	0	0	0	0	0	0	0	0	0	0	0	0	0	0	0	0
743598		0	0	0	0	0	0	0	0	0	0	0	0	0	0	0	0	0.5	0	0	0	0	0	0	0	0	0	0	0	0	0	0
262728		0	0.00516796	0.411111	0	0.5	0	0.0625	0.0181831	0	0	0	1.61111	0	0	0	0.142857	0.142857	0	0	0	0	0.00651466	0	0.005923	0.458333	0	0	0.0181691	0.361111	0	0
6744		0	0	0	0	0	0	0	0	0	0	0	0	0	0	0	0	0	0	0	0	0	0	0	0	0	0	1	0	0	0	0
169963		0.285714	0.166667	0	0	0.525	0	0	0.344877	0	0	0	0.610714	0	0	0	0	0.0625	0	0	0	0	0	0	0	0.333333	0	0	0	0.125	0	0
129934		0	0	0	0.111111	0	0	0	0	0	0	0	0	0	0	0	0	0	0	0	0	0	0	0	0	0	0	0	0	0	0	0
1049272		0	0	0	0	0	0	0	0.0123418	0	0	0	0	0	0	0	0	0	0	0	0	0	0.00458716	0	0.00478469	0	0	0	0.00912289	0	0	0
487344		0	0	0	0	0	0	0	0.0159526	0	0	0	0	0	0	0	0	0	0	0	0	0	0	0	0	0	0	0	0	0	0	0
880070		10.2	0	37	0	10.65	0	0.5	1	0	0	0	61	11.25	0	0	0	19.3333	0	0	0	0	0	0	0	71.5	0	0	0	33	0	0
937774		1	0.0201681	0	0	0	0	0	0.02048	0	0	0	21.8333	0	0	0	0	8.5	0	0	0	0	0.0204119	0	0.0103093	1.5	0	0	0.0378613	1.5	0	0
73239		2	0	0	1.33333	1.83333	0	3.7	0	0	3.33333	0	2	1.4	0	0	0	4.25	0.25	0	0	0	0	0	0	0.5	0	0.666667	0	2	2.33333	0
376724		0	0.0905155	0	0	0	0	0	0.0232558	0	0	0.0430157	0	0	0	0	0	0	0	0	0	0	0	0	0	0	0	0	0.0243902	0	0	0
69129		0	0	0	0	0	0	0	0	0	0	0	0	0	0	0	0	0	0	0	0	0	0	0	0.00555556	0	0	0	0	0	0	0
525897		3	1	1	2.5	39.2778	0	1.5	1	0	0	1	2	0.833333	0	0	2	2	0	0	0	0	0.5	0	0	8.5	0	0	0	6.75	0.5	0
419576		0	0	0	0	0	0	0	0.00204499	0	0	0	0	0	0	0	0	0	0	0	0	0	0	0	0	0	0	0	0	0	0	0
51031		0	0	0	0	0	0	0	0	0	0	0	0	0	0	0	0	0	0	0	0	0	0	0	0	0	0	0.0042735	0	0	0	0
38568		1.5619	1	0	5.78697	1.33333	0	1	1.25	0	1.66667	0	1	0	0	0	3	1.5	0	0	0	0	0	0	0	2	0	0	0	0	0	0
44598		0	0	0	0	0	0	0.75	0	19.4167	3.33722	0	0.5	0	1	0	0	14	12.0098	0	0.5	0	0	7.64291	0	0	29.5264	0	0	0	0	2
33943		3	0	0.5	2.33333	16.8333	0	0	1.5	0	1	1	1	0	0	0	2	0	0	0	0	0	1	0	0	2	0	1	2	1	0	0
1988		0	0	0	0	0	0	0	0	0	0	0	1	0	0	0	0	0	0	0	0	0	0	0	0	0	0	0.333333	0	0	0	0
236781		0	0	0	1	0	0.5	0	0	0	2	0	1	0	0	0	0	0	0	0	0	0	0	0	0	0	0	0	0	0	0	0
85182		0	0	0	0	0	0	0.027027	0	0	0	0	0	0	0	0	0	0	0	0	0	0	0	0	0	0	0	0	0	0	0	0
35034		0	0	0	0	0.5	0	0	0	0	0	0	0	0	0	0	0	0	0	0	0	0	0	0	0	0	0	0	0	0	0	0
682957		0	0	0	0	0	0	0	0.00371747	0	0	0	0	0	0	0	0	0	0	0	0	0	0.00371747	0	0	0	0	0	0	0	0	0
39723		0	0	1.25	0	0	0	0	0	0	0	0	0	0	0	0	0	0	0	0	0	0	0	0	1	0	0	0	0	0	0	0
46239		1	0	0	0	4	0	0	0	0	0	0	2.64286	0	0	0	0	2	0	0	0	0	0	0	0	0	0	0	0	0	0	0
587319		0	0.013677	0	0	0	0	0	0.0111111	0	0	0	0	0	0	0	0	0	0	0	0	0	0	0	0	0	0	0	0	0	0	0
74490		0	0	0	0	0	0	0	0	3.01124	0	0	0	0	0.111111	0	0	0	0	0	0.0136986	0	0	0.331782	0	0	4.58346	0	0	0	0	0
427923		2	2.5	2	1.5	74.5556	1	2	4	0	2	0	1.61905	0	0	0	4.77778	5.2	0	0	0	0	2	0	0	18	0	1	0	11.75	3.5	0
452809		0	0	0	0	1	0	0	0	0	0	0	0	0	0	0	0	0	0	0	0	0	0	0	0	0	0	0	0	0	0	0
879241		0	0	0	0	0	0	0	0	0	0	0.004	0	0	0	0	0	0	0	0	0	0	0.004	0	0	0	0	0	0	0	0	0
326968		0	0	0	0	0	0	0	0	0	0	0	0	0	0	0	0	1	0	0	0	0	0	0	0	0	0	0	0	0	0	0
453450		0	0	0	0	0	0	0	0	0	0	0	0	0	0	0	0	0	0	0	0	0	0	0	0	0	0.004	0	0	0	0	0
36718		0	0	0	0	0	0	0	0	0	0	0	0	0	0	0	0	0	0	0	0	0	0	0	0.00555556	0	0	0	0	0	0	0
45350		8	0	35.3333	54.25	10.3333	22.5	67.25	0	32.4279	37.7599	0	72.8333	6	6.38639	1	2.33333	8.75	8.91667	0	10.8406	0	0	71.4074	0	49.5	14.4583	23.7935	0	13.5	29.5	4
788		2.83333	0	1	0.00323625	6.33333	0	0	0	0	0	0	5.61111	0.5	0	0	0	4	0	0	0	0	0	0	0	0	0	0	0	0	0	0
935135		0	0	0	0	0	0	2	0	0	0	0	0	0	0	0	0	0	0	0	0	0	0	0	0	0	0	0	0	0	0	0
4797		0	0	0	0	0	0	0	0	0	0	0	0.2	0	0	0	0	0	0	0	0	0	0	0	0	0	0	0	0	0	0	0
1042878		1.5	40.648	13.5	25.0313	106.983	8.64286	8.22619	46.2251	0	2.64286	25.5595	4.00833	0	0	0	2.5	4.58333	0	0	0	0	32.3753	0	21.1767	9.83333	0	5.9881	40.528	8.83333	4.4881	0
248048		7.5	0	0	0	0	0	0	0	0	0	0	13	2	0	0	0	2.09091	0	0	0	0	0	0	0	0	0	0	0	0	0	0
385067		0	0	0	0	0	0	0	0	0	0	0	0	0	0	0	0	0	0	0	0	0	1	0	0	0	0	0	0	0	0	0
47834		0	0	0	0	0	0	0	0	0	0	0	2	0	0	0	0	0	0	0	0	0	0	0	0	0	0	0	0	0	0	0
272831		0.238889	0.142857	0.188406	2.68904	2.83033	0.755134	1.91422	0	0	0.169935	0	0.851413	0	0	0	0.0769231	0.0990338	0	0	0	0	0	0	0	0.483333	0	0.663029	0	0.1	0.900793	0
388435		1	0	0	0	0	0	0	0	0	0	0	0	0	0	0	0	0	0	0	0	0	0	0	0	0	0	0	0	0	0	0
490		0	0	0	0	0	0	0	0	0	0	0	0	0	0	0	0	0	0	0	0	0	0	0	0	1	0	0	0	0	0	0
563178		0.452381	0.000861326	0.166667	0	0.880952	0	0.142857	0.00379388	0	0	0	1.76667	0.142857	0	0	0	1.18849	0	0	0	0	0	0	0	0	0	0	0.000861326	0	0	0
77133		38.5176	71.4201	67.6136	18.3781	2503.84	9.16667	36.7893	102.138	0	13.126	59.0211	1777.61	1846.53	0	0	2149.21	83.4942	0	1	0	1	64.8488	0	26.6557	89.5072	0	8.35	49.9009	47.3455	17.2	0
504591		0	0	0	0	0	0	0	0	0	0	0	0	0	0	0	0	0.333333	0	0	0	0	0	0	0	0	0	0	0	0	0	0
55197		17.5	0	93.6667	1.5	24.5	0	0	1	0	1	0	226.258	28.8333	0	0	0	47.5	0	2	0	0	0	0	0	21	0	2	0	35.3333	2	0
1035729		0	0	0	0	0.004	0	0	0	0	0	0	0	0	0	0	0	0	0	0	0	0.004	0	0	0	0	0	0	0	0	0	0
659877		0	0	0	0	0	0	0	0	0	0	0	0	0	0	0	0	0	0	0	0	0	0	0	0	0	0	0	0	0	0	0
7894		0	0	0	0	0	0	0	0	0	0	0	0	0	0	0	0	0	0	0	0	0	0	1	0	0	1	0	0	0	0	0
4640		0	0	0	2	0	1	1	0	1.68637	0	0	0	0	0.276007	0	0	0	0.176568	0	0.169958	0	0	5.13443	0	1	4.40276	0	0	0	0	0.00990099
931529		0	0	0	0	0.25	0	0	0	0	0	0	0	0	0	0	0	0	0	0	0	0	0	0	0	0	0	0	0	0	0	0
7111		0	0	0	0	0	0	0	0	0	1	0	0	0	0	0	0	0	0	0	0	0	0	0	0	0	0	0	0	0	1	0
782		1	0	0	0.00970874	5.5	0	1	0	0	0	0	7.33333	2	0	0	1	3.66667	0	0	0	0	0	0	0	0	0	0	0	0	0	0
1127667		0	0.008	0	0	0	0	0	0.008	0	0	0	0	0	0	0	0	0	0	0	0	0	0.008	0	0	0	0	0	0.004	0	0	0
83541		0	0	0	0	0	0	1	0	0	0	0	0	0	0	0	0	1	0	0	0	0	0	0	0	0	0	0	0	0	0	0
62746		0	0	0	0	0	1	1	0	0	0	0	0	0	0	0	0	0	0	0	0	0	0	0	0	0	3	0	0	0	0	0
279653		0	0	0	0	0	0	0	0	0	0	0	0	0	0	0	0	0	0.004	0	0	0	0	0	0	0	0	0	0	0	0	0
512657		0	0.00389105	0	0	0	0	0	0	0	0	0	0	0	0	0	0	0	0	0	0	0	0	0	0	0	0	0	0	0	0	0
120298		0	0	0	0	0	0	0	0	0	0	0	1	0	0	0	0	0	0	0	0	0	0	0	0	0	0	0	0	0	0	0
34399		0	0	0	0.08	0	0.0196078	0.02	0	0	0	0	0	0	0	0	0	0	0	0	0	0	0	0	0	0	0	0	0	0	0	0
781		0	0	0	3.00647	0.285714	0	0	0	0	0	0	0.288034	0	0	0	0	0.125	0	0	0	0	0	0	0	0	0	0	0	0	0	0
1128393		0	0	0	0	0	0	0	0.00795257	0	0	0.004	0	0	0	0	0	0	0	0	0	0	0.00395257	0	0	0	0	0	0	0	0	0
412840		0	0	0	2.1	0	1.41014	4.63333	0	0	3.95628	0	0	0	0	0	0	0	0	0	0	0	0	0	0	0	0	0.6	0	0	2.14348	0
743546		0	0	0	0.333333	0	0	0.5	0	0	0	0	0	0	0	0	0	7.83333	0	0	0	0	0	0	0	0	0	0.25	0	0	0	0
56688		0	0	1	0	0.5	0	0	0	0.25	0	0	0	0	0	0	0	0.25	0	0	0	0	0	0	0	0	0	0	0	0	0	0
223990		0	0	0	0	0	0	0	0	1.07914	0	0	0	0	0.0526316	0	0	0	0.985368	0	0.0518659	0	0	0.270327	0	0	0.164279	0	0	0	0	0
451368		0	0	0	0	0	0	0	0.00204499	0	0	0	0	0	0	0	0	0	0	0	0	0	0	0	0	0	0	0	0	0	0	0
39185		0	0	0	1	0	0.5	0	0	0	0	0	0	0	0	0	0	0	0	0	0	0	0	0	0	0	0	0	0	0	0	0
169760		0	0	0	0	0	0	0	0.00371747	0	0	0	0	0	0	0	0	0	0	0	0	0	0	0	0.004	0	0	0	0	0	0	0
927226		0	0	0	0	0	0	0	0	0	0	0	0	0	0	0	0	0	0	0	0	0	0.004	0	0	0	0	0	0	0	0	0
167815		0	0	0	0	0	0	0	0	4.03048	0	0	0	0	0	0	0	0	5.15948	0	0	0	0	2.01054	0	0	2.02726	0	0	0	0	1
872		2	2	17.3333	26.5833	178.939	3.66667	14.8333	1.5	0	3	0.7	9	1.5	0	0	7.83333	17.6667	0	0	0	0	4.4	0	0	42.8333	0	2.5	3	50.6667	3.83333	0
321388		0	0	0	0	0	0	0	0	0	0	0	0	0	0	0	0	0	0	0	0	0	0	0	0	0	0	0.0042735	0	0	0	0
71941		0	0	0	0	0	0	0	0	0	0.0344828	0	0	0	0	0	0	0	0	0	0	0	0	0	0	0	0	0	0	0	0	0
42476		0	0	0	0	0	0	0	0	0	0	0	0	0	0	0	0	0	0	0	0	0	0	0	0	0	0	0.0641026	0	0	0	0
52903		0	0	0	0	0	0	1.5	0	0	0	0	0	0	0	0	0	0	0	0	0	0	0	0	3.01548	0	0	0	0	0	0	0
309807		0.5	0	2.5	1	4	0	0	0	0	0	0	3	0	0	0	0	5.18182	0	0	0	0	0	0	0	4.5	0	1	0	0.7	0	0
10229		0	0	0	0	1	0	0	0	0	0	0	0	0	0	0	0	0	0.0384615	0	0	0	0	0	0	0	0	0	0	0	0	0
10026		0	0	0	19.2957	3.86667	13.9	17.8917	0	2.08	20.6678	0	0	0	0	0	1	3	2.0339	0	0.125	0	0	4.25	0.0166667	2	3.82051	21.629	0	0	11.1154	0
400868		0	0	0	0.0120482	0	0.309524	0.166667	0	0	0.166667	0	0	0	0	0	0	0	0	0	0	0	0	0	0	0	0	0.5	0	0	0.012987	0
315013		0	0	0	0	0.0151515	0	0	0	0	0	0	0	0	0	0	0	0	0	0	0	0	0	0	0	0	0	0	0	0	0	0
36546		0	0	1	0	0	0	0	0	0	0	0	0	0	0	0	0	0	0	0	0	0	0	0	0	0	0	0	0	0	0	0
182737		0	0	0	0	0	0	0	0	0	0	0	0	0	0	0	0	0	5.08333	0	0	0	0	0.25	0	0	0.24268	0	0	0	0	0
552526		0	0	0	0	0	0	0	0.502045	0	0	0	0.2	0	0	0	0	0.2	0	0	0	0	0	0	0.277778	0	0	0	0	0	0	0
27770		0	0	0	0	0	0	0	0	0	0	0	0	0	0	0	0	0	0	0	0	0	0	0	0.00404858	0	0	0	0	0	0	0
7174		1	2.04978	11.5	7	9.5	2	14	2.1349	3	8	1.1204	10	0	0	0	1	3.75	0	0	0	0	1.40001	0	0.348006	6.2	0	3.16667	2.87537	4.93333	2.5	0
69218		0	0	0	0	1	0	0	0	0	0	0	0	0	0	0	0	0	0	0	0	0	0	0	0	0	0	0	0	0	0	0
1056092		0	0	0	0	0	0	0	0	0	0	0	0	0	0	0	0	0	0	0	0	0	0.00398406	0	0	0	0	0	0	0	0	0
37581		0	0	0	0	0	0	2	0	1	0	0	0	0	0	0	0	0	0	0	0	0	0	2	0	0	4	1	0	0	1	0
373547		0	2	0	0	0	0	0	0	0	0	1	0	0	0	0	0	0	0	0	0	0	3	0	0	0	0	0	0	0.5	0	0
46218		0	0	0	0	0	0	0	0	0	0	0	0	0	0	0	0	0	0	0	0	0	0	0	0	0	0	0	0	0	0.111111	0
1318		0	2.8	0	0	1	0	0	0	0	0	0	1.33333	1	0	0	0	0	0	0	0	0	0	0	0.2	0	0	0	1	0.5	0	0
347814		0	0	0	0	0	0	0	0	0	0	0	0.125	0	0	0	0	0.25	0	0	0	0	0	0	0	0	0	0	0	0	0	0
524284		0	0	0	0	0	0	0	0	0	0	0	0	1	0	0	0	0	0	0	0	0	0	0	0	0	0	0	0	0	0	0
487214		0	0.0434783	0	0	0.168478	0	0	0.0434783	0	0	0	0	0.0416667	0	0	0	0	0	0	0	0	0	0	0	0	0	0	0	0	0	0
686610		0	0	0	0	0	0	0	0	0	0	0	1	0	0	0	0	0	0	0	0	0	0	0	0	0	0	0	0	0	0	0
206411		0	0	0	0	0	0	0	0	0.5	0	0	0	0	0	0	0	11	0.5	0	0	0	0	0.5	0	0	0	0	0	0	0	0
188056		0	1.00395	0	0	0	0	0	0.00811924	0	0	0.00790514	0	0	0	0	0	0	0	0	0	0	0.00785882	0	0	0	0	0	0.0121878	0	0	0
166020		0	0	0	0	0	0	0	0	0	0.0194553	0	0	0	0	0	0	0	0	0	0	0	0	0	0	0	0	0	0	0	0	0
703339		0	0.00530974	0	0	0.112637	0	0	0.0416667	0	0	0	0.206838	0	0	0	0	0.0715198	0	0	0	0	0	0	0	0.220556	0	0	0	0.0357143	0	0
229289		0	0	0	1	0	0	1.33333	0	2	0	4	0	0	0	0	0	0	9	0	0	0	0	0	19.0185	0	3	0	0	0	0	0
33491		0	0	0	0	0	0	0	0	0	0	0	0	0	0	0	0	0	0.0209686	0	0	0	0	0.008	0	0	0.0135135	0	0	0	0	0
912820		0	0.00396825	0	0	0	0	0	0.00793651	0	0	0	0	0	0	0	0	0	0	0	0	0	0	0	0	0	0	0	0.00396825	0	0	0
124129		0	0	0	0	0	0	0	0	0	0	0	0	0	0	0	0	0	0	0	0	0	0	0	0	0	0	0	0	0	0	0
377637		0	0	0	0	3	0	0	0	0	0	0	0	0	0	0	0	0	0	0	0	0	0	0	0	0	0	0	0	0	0	0
337687		14.4286	0.908333	0.549769	93.4269	45.5967	38.949	113.699	2.42808	39.8366	86.1082	9.97222	9.4619	4	6.5042	0	11.0833	17.4405	20.6202	1	5.89377	1.964	18.2175	71.4083	13.3136	2.79247	24.3212	56.4043	1.42063	6.76087	47.4282	4.59323
455511		5.5	0	0	0	0	0	0	0	0	0.5	0	15.3333	4	0	0	0	5.5	0	0	0	0	0	0	0	0	0	0	0	0	0	0
248890		0	0	0	0	0.004	0	0	0	0	0	0	0.00925926	0	0	0	0	0	0	0	0	0	0	0	0	0	0	0	0	0	0	0
119259		0	0	0	0	0	0.5	0	0	6.5	0.5	0	0	0	0	0	0	0	6	0	1	0	0	0	0	0	8	1	0	0	1	1
90728		0	0	1	0	0	0	0	0	0	0	0	0	0	0	0	0	0	0	0	0	0	0	0	0	0	0	0	0	0	0	0
529507		1.16667	0.200474	0	0	9.75	0	0	0.691242	0	1	0	10.2	3	0	0	0.166667	5	0	0	0	0	0.00760043	0	0.201355	1.33333	0	0	1.02872	15.1429	0	0
30283		0	0	0	0	0	0	0	0	0	0	0	0	0	0	0	0	0	0	0	0	0	0	0	0	0	2	0	0	0	0	0
53452		0	0	0	0	3.66667	0	0	0	0	0	0	0	0	0	0	0.5	0	0	0	0	0	0	0	0	0	0	0	0	0	0	0
548473		0	0.00530974	0	0	0.112637	0	0	0.0416667	0	0	0	0.509709	0	0	0	0	0.32152	0	0	0	0	0	0	0	0.0955556	0	0	0	0.0357143	0	0
165395		0	0	0	0	0	0	0	0	0	0	0	0	0	0	0	0	0.25	0	0	0	0	0	0	0	0	0	0	0	0	0	0
77569		0	0	0	0	0	0	0	0	0	0	0	0	0	0	0	0	0	0.227273	0	0	0	0	0	0	0	0.0135135	0	0	0	0	0
58923		0	0	0	0	0	0	0	0	0	0	0.0866627	0	0	0	0	0	0	0	0	0	0	0	0	0.0181818	0	0	0	0	0	0	0
6239		1.7619	0	1	4	1	0	9.70588	0	10.75	6.42529	0	2.28571	1	0	0	0	2.54545	2.75	0	0	0	0	0.75	0	0	4.58333	4.01709	0	1	2.53846	0
147366		1.16667	0.00295092	0	0.00101112	0.25	0	1.71212	0.0113437	0	2	0.693008	1	0	0	0	0	0	0	0	0	0	2.00109	0	0.164624	0	1	1	0.00410229	0	1	0
455556		0	0	1	0	59	0	0	0	0	0	0	3	1	0	0	1.5	0.5	0	0	0	0	0	0	0	0	0	0	0	1	0	0
36206		0	0	0	0	0	0	0	0	0	0	0	0	0	0	0	0	0	0	0	0	0	0	0	0.00571429	0	0	0	0	0	0	0
1036772		0	0	0	0	0	0	0	0	0	0	0	0	0	0	0	0	0	0	0	0	0	0.0117647	0	0	0	0	0	0	0	0	0
66828		0	0	0	0	0	0	0	0	0	0	0	0	0	0	0	0	0	0.024	0	0	0	0	0	0	0	0	0	0	0	0	0
73901		0	0	0.249958	0	0	0	0	0	0	0	0	0	0	0	0	0	0	0	0	0	0	0	0	0	0	0	0	0	0.0322581	0	0
2062		9.5	4.25	21.3333	17.5	201.561	7.33333	14.3333	0.5	0	5.2	5.25	82.3333	10.5	0	0	15.7	46	0	0	0	0	8	0	2	28.6667	0	5	7.5	11.5	6	0
177560		0	0	0	0	4.81667	0	0	0	0	0	0	0	0	0	0	0	0	0	0	0	0	0	0	0	0	0	0	0	0	0	0
28448		1	0.333333	3	2.51618	96.5088	0	6	0.333333	0	1	0	5	0	0	0	3	3	0	0	0	0	4	0	0	10	0	0.666667	0	10.8333	1	0
685597		0	0	0.0384615	0	0	0	0	0	0	0	0	0	0	0	0	0	0	0	0	0	0	0	0	0	0	0	0	0	0	0	0
2886		0	0	0	0	4	0	0	0	0	0	0	0	0	0	0	0	0	0	0	0	0	0	0	0	0	0	0	0	0	0	0
160738		0	0	0	0	0	0	0	0	0	0	0.0625	0	0	0	0	0	0	0	0	0	0	0	0	0.00555556	0	0	0	0	0	0	0
419555		0	0	0	0	0	0	0	0.00204499	0	0	0	0	0	0	0	0	0	0	0	0	0	0	0	0	0	0	0	0	0	0	0
299032		0	0	0	0	0	0	0	0	0	0	0	0	0	0	0	0	0	0	0	0	0	0	0	0	1	0	0	0	0	0	0
91836		4.37619	0.12	0.0078125	8.65094	18.9535	3.69643	15.7917	3.06249	8.63879	12.25	1.2	25.0889	0	1.84396	0	0.333333	10.7143	4.11288	2.86538	7.51217	1.16348	2.33333	25.1502	1.14815	2.00645	5.27651	10.1818	2.04348	2	2.51299	0.219425
7212		0	0	0	0	0	0	0	0	0	0	0	0	0	0	0	0	0	0	0	0	0	3	0	0	0	0	0	1	0	0	0
69277		20.4286	20.8333	197.567	64.5562	6896.54	7.5	63.1696	11.25	0	21.3333	16.6667	41.3667	6	0	0	397.041	26	0	0	0	0	10	0	2.5	748.162	0	32.4103	15.6667	160.289	32.6667	0
61901		0	0	0	0.333333	0	0.333333	0.333333	0	0	0	0	0	0	0	0	0	0	0	0	0	0	0	2	0	0	0	0	0	0	0.5	0
321381		0	0	0	0	0	0	0	0	0	0	0	0	0	0	0	0	0	0	0	0	0	0	0	0	0	0	0.0042735	0	0	0	0
680041		0	0	0	0	0	0	0.12549	0	0	0	0	0	0	0	0	0	0	0	0	0	0	0	0	0	0	0	0	0	0	0	0
479434		0	0	3	3.33333	23.5	1	0	0	0	0.333333	0	1	1	0	0	3	4.5	0	0	0	0	0	0	0	0.5	0	4	0	0	2	0
378210		0	0	0	0	1	0	0	0	0	0	0	0	0	0	0	0	0	0	0	0	0	0	0	0	0	0	0	0	0	0	0
7957		0	0	0	0.285714	0	1	0.333333	0	1.83333	0.333333	0	0	0	0	0	0	0	1	0	0	0	0	2	0	0	0.333333	1	0	0	1.7	0
326424		1	0	1	0.25	8.83333	0	0	0	0	0.25	0	4.5	0.047619	0	0	0.5	2.75	0	0	0	0	0	0	0	1	0	0.5	0	0	0.25	0
37412		0	0	0	0	0	0	0	0	0	0	0	0	0	0	0	0	0	0	0	0	0	0	0	0	0	0	0	0	0	0.134615	0
710740		0	0.0612245	0	0	7.33333	0	0	0.02	0	0	0	0	0.333333	0	0	1	4	0	0	0	0	0.02	0	0.102041	0	0	0	0.0204082	0	0	0
8364		1	0.5	1	34.8583	19.8333	16.7222	42.5691	0	37.9701	26.9421	12.6508	0.333333	1	0.499817	1	1.5	1.85714	11.7694	0	3.56043	0	1	37.0527	5.01667	0.666667	15.3349	23.4762	2	2	14.7701	0.509901
104435		0	0	0	0	0	0	0	0	0	1	0	0	0	0	0	0	0	0	0	0	0	0	0	0	0	0	0	0	0	0	0
841		0	1.00619	1	0	8.5	0	0	4	0	0	0	0	1	0	0	1	0	0	0	0	0	0	0	1	0	0	0	3	1	0	0
996603		0	0	0	1	0	0	0	0	0	0	0	0	0	0	0	0	0	0	0	0	0	0	0	0	0	0	1	0	0	0	0
685782		1.16667	0.0434783	0.333333	0	4.375	0	0	0	0	0	0	11.1667	0.5	0	0	0	9.58333	0	0	0	0	0	0	0	1	0	0	0	2	0	0
216321		0	0	0	0	0	0	0	0	0	0.0153846	0	0	0	0	0	0	0	0.00505051	0	0	0	0	0	0	0	0.008	0.0042735	0	0	0.0303309	0
101158		0	0	0	0	0	0	0	0	0	0	0	0	0	0	0	0	0	0.020202	0	0	0	0	0	0	0	0	0	0	0	0	0
489117		0	0	0	0	0	0	0	0	2	0	0	0	0	0	0	0	0	0	0	0	0	0	0	0	0	0	0	0	0	0	0
1128651		0	0	0	0	0.004	0	0	0	0	0	0	0.00925926	0	0	0	0	0	0	0	0	0.004	0	0	0	0	0	0	0	0	0	0
60847		1	0	0	0	1	0	1	0	0	0	0	0	0	0	0	0	0	0	0	0	0	0	0	0	0	0	0	0	0	0	0
441375		1	0	0	3	0	0	0	0	0	0	0	3	0	0	0	0	1	0	0	0	0	0	0	0	0	0	0	0	0.0833333	0	0
147550		5.99167	4.86667	11	9.08108	52.5707	4.35294	18.3533	120.333	9.41303	6.01556	4	4	0	0.220869	0	0	5	0.626568	0	1.34212	0	707.911	19.0934	0	14.25	1.24159	14.5	9	5	5	0.00990099
53354		0	0	1	0	0	0	0	0	0	0	0	1.75	0.75	0	0	0	0.6	0	0	0	0	0	0	0	0	0	0	0	2	0	0
147371		0	0	0	0	0	0	0	0	0.333333	0	0.0108696	0	0	0	0	0	0	0	0	0	0	0	0	0	0	0.111111	0	0	0	0	0
40479		1	0	0	0	0.666667	0	0	0	0	0	0	8.08333	0	0	0	0	0	0	0	0	0	0	0	0	0.111111	0	0	0	0.111111	0	0
33056		0	0	0	0	0	0	0	0	0	0	0	0.2	0	0	0	0	0	0	0	0	0	0	0	0	0	0	0	0	0	0	0
13641		0	0	0	0	2	0	0	0	0	0	0	0	0	0	0	0	0	0	0	0	0	0	0	0	0	0	0	0	0	0	0
527799		0	0	0	0	0.05	0	0	0.0178571	0	0	0	0	0	0	0	0	0	0	0	0	0	0	0	0	0	0	0	0	0	0	0
27335		1	0.5	0	0	1	0	0	7.5	0	0	0	0	0	0	0	0	0.5	0	0	0	0	70	0	0	1.5	0	0	1	0	0	0
92064		0	0	0	0	0	0	0	0	0	0	0	0	0	0	0	0	0	0	0	0	0	0	0	0.00404858	0	0	0	0	0	0	0
135152		0	0.0238095	0	0	0	0	0	0.0496289	0	0	0	0	0	0	0	0	0	0	0	0	0	0.0388889	0	0	0	0	0	0.0419492	0	0	0
765698		2.14286	5.33333	44.8333	12.3733	1918.05	0.5	6.66667	2	0	6.16667	4	12	2	0	0	105.091	11	0	0	0	0	2	0	0.5	41.9336	0	4	1	26.5	2	0
172867		0	0	0	0	0	0	0	0	0	0	0	0	0.333333	0	0	0	1	0	0	0	0	0	0	0	0	0	0	0	0	0	0
52047		0	0	0	0	0	0	0	0	0	0	0	0	0	0	0	0	0	0	0	0	0	0	0	0	0	0.0135135	0	0	0	0	0
393482		0	0	0	0	0.004	0	0	0	0	0	0	0.00925926	0	0	0	0	0	0	0	0	0	0	0	0	0	0	0	0	0	0	0
480263		0	0	0	0	0	0	0	0	0	0	0	0	0	0	0	0	0	0.064	0	0	0	0	0	0	0	0	0	0	0	0	0
356796		0	0	0	0	0	0	0	0	0	0	0	1	0	0	0	0	0	0	0	0	0	0	0	0	0	0	0	0	0	0	0
2953		1	0	0	1	0	0	0	0	0	0	0	0	0	0	0	0	3	0	0	0	0	0	0	0	0	0	3	0	0	0	0
4058		0	0	0	1	0	0	0	0	0	0	0	0	0	0	0	0	0	0	0	0	0	0	0	0	0	0	0	0	0	0	0
6947		0	0	0	0	0	0	0	0	0	1	0	0	0	0	0	0	0	0	0	0	0	0	0	0	0	0	0	0	0	0	0
6085		5	0	8	11	9.83333	11	14.8333	0.5	20.8333	12.8333	0	14.5	3	0	0	0	5	3.33333	0	1	0	0	13	0.25	1.5	13.619	11	0	3.5	13.5	2
469350		0	0	0	0	0	0	0.316667	0	0	0	0	0	0	0	0	0	0	0	0	0	0	0	0	0	0	0	0	0	0	0	0
189479		0	0	0	0	0	0	1.75	0	0	0	0	0	0	0	0	0	0	0	0	0	0	0	0	0	0	0	0	0	0	0	0
143345		0	0	0	0	0	0	0	0	0	0	0	0	0	0	0	0	0	0	0	0	0	0	0	0.24	0	0	0	0	0	0	0
79716		0	0	0	0	0	0	1	0	1.5	0	0	0	0	0	0	0	0	0	0	0	0	0	0	0	0	0.5	0	0	0	0	0
388894		0	0	0	0	0	0	0	0	0	0	0	0	0	0	0	0	0	0	0	0	0	0	0	0	0	0	0	0	0	0.00961539	0
110453		0	0	0	0	0	0	0	0	0	0	0.155072	0	0	0	0	0	0	0	0	0	0	0	0	0.0181818	0	0	0	0	0	0	0
69603		0	0	0	0	0	0	0	0	0	0	0	0	0	0	0	0	0	0.024	0	0	0	0	0	0	0	0	0	0	0	0	0
985780		0	0	0	0	1	0	0	0	0	0	0	2	0	0	0	0	1	0	0	0	0	0	0	0	0	0	0	0	0	0	0
402760		0	0	0	0	0	0	0	0	0	0	0	0	0	0	0	0	0.004	0	0	0	0	0	0	0	0	0	0	0	0	0	0
289389		0	0	0	0	1.73333	0	0	0	0	0	0	0	0	0	0	0	0	0	0	0	0	0	0	0	0	0	0	0	0	0	0
66778		0	0	0	0	0	0	0	0	0	0.0077821	0	0	0	0	0	0	0	0	0	0	0	0	0	0	0	0	0	0	0	0	0
192392		0	0	0	0	0	0	0	0	0	0	0	0	0	0	0	0	0	0	0	0	0	0	0	0	0	0.027027	0	0	0	0	0
141980		0	0	0	0	0	0	1	0	0	0	0	0	0	0	0	0	0	0	0	0	0	0	0	0	0	0	0	0	0	0	0
930170		0	4.65525	0.05	0	3	0	0	2.70758	0	0	1.5361	13.4272	2.5625	0	0	0	0.0588235	0	0	0	0	0.824096	0	0	0	0	0	3.5	2	0	0
1029608		0	0	0	0	0	0	0	0.0119683	0	0	0	0	0	0	0	0	0	0	0	0	0	0	0	0	0	0	0	0	0	0	0
59922		0.222222	0.00176991	0	0	6.5	0	0	0	0	2	0	0.5	0	0	0	0	5	0	0	0	0	0	0	0	0	0	0	0	0	0	0
6069		0	0	0	0	2	0	0	0	0	0	0	0	0	0	0	0	0	0	0	0	0	0	0	0	0	0	0	0	0	0	0
121215		0	0	0	0	0	0	0	0	0	0	0	0	0	0	0	0	0	0.0151515	0	0	0	0	0	0	0	0	0	0	0	0	0
379363		1	0	0	0	0	0	0	0	0	0	0	0	0	0	0	0	3	0	0	0	0	0	0	0	0	0	0.5	0	0	0	0
410358		0	0	0	0.333333	2	0.5	0	0	0	0	0	0	0	0	0	1	1.5	0	0	0	0	0	0	0	0	0	0	0	14	0	0
266018		0	0	0	0	0	0	0	0	0	0	0	0	0	0	0	0	0.555556	0	0	0	0	0	0	0	0	0	0	0	0	0	0
376165		0	0	0	0	0	0	0	0	0	0	0	0	2	0	0	0	0	0	0	0	0	0	0	0	0	0	0	0	0	0	0
314672		0	0	0	0	0	0	0.666667	0	0	0	0	0	0	0	0	0	0	0	0	0	0	0	0	0	0	0	0	0	0	0	0
305		0	314.643	9.87778	57.3352	151.934	8.7381	37.1833	310.251	0	21.4667	140.799	6.41667	1.16667	0	0	8.76111	5.07229	0	0	0	1	219.025	0	116.044	25.4667	0	17	192.775	12.6333	17.4333	0
1069906		0	0	0	0	0	0	0	0	0	0	0.004	0	0	0	0	0	0	0	0	0	0	0	0	0	0	0	0	0	0	0	0
947495		0	0	0	0	0.004	0	0	0	0	0	0.004	0	0	0	0	0	0	0	0	0	0.004	0	0	0	0	0	0	0	0	0	0
40041		0	0	0	0	0	0	0	1.00204	0	0	0	0.6	0	0	0	0	0.2	0	0	0	0	0	0	0.611111	0	0	0	0	0.5	0	0
698368		0	0	0	1.07692	0	0.5	0.5	0	0	0	0	0	0	0	0	0	0	0	0	0	0	0	0	0	0	0	0.5	0	0	0	0
216299		0	0	0	0	0	1	0	0	0	0.0153846	0	0	0	0	0	0	0	0	0	0	0	0	0	0	0	0	0.0042735	0	0	0.0147059	0
28377		0	0	0	27.0833	3.5	10	26.9167	0	8.33333	21.4167	0.5	3.16667	0	1	0	1	2	6.5	0	0	0	0	3.5	0.505556	1.33333	10.037	16	0	0	17.3333	1
45492		0	0	0	0	0	0	0	0	0	0	0	0	0	0	0	0	0	0	0	0	0	0.0434783	0	0	0	0	0	0	0	0	0
75612		0	0.5	0	0	0	0	0	0	0	0	0	0	0	0	0	0	0	0	0	0	0	0	0	0	0	0	0	1	0	0	0
526222		0	0	1	0	4.44444	0	1	0	0	0	0	0	0.5	0	0	0	3	0	0	0	0	0	0	0	4	0	0	0	9	0	0
9545		0	0	0	0	0	0	0	0	0	0.146341	0	0	0	0	0	0	0	0	0	0	0	0	0	0	0	0	0.146341	0	0	0	0
145360		0	0	13	0	6.5	1	0	0	0	0	0	14.5789	0	0	0	0	3.06667	0	0	0	0	0	0	0	3.5	0	1	0.0666667	0	0	0
649615		0	0	0	0	0	0	0	0	0	0.00389105	0	0	0	0	0	0	0	0	0	0	0	0	0	0	0	0	0	0	0	0	0
45151		0.2	0	0	0	0	0	1	0	0	0	0	0	0	0	0	0	0	0	0	0	0	7.25	0	0	0	0	0	0	0	0	0
77915		0	0	0	0	0	0	0	0	0	0	0	0	0	0	0	0	0	0	0	0	0	0	0	0	0	0	0	0	1	0	0
28839		0	0	0	0	0	0	0	0	0	0	0	0	0	0	0	0	0	0	0	0	0	0	0	0	0	0	0.0042735	0	0	0	0
94931		0	0	0	0	0	0	0	0	0	0	0	0	0	0	0	0	0	0	0	0	0	0	0	0.0510101	0	0	0	0	0	0	0
85032		0	0	0	0.5	7.33333	0	0	0	0	2	0	2.16667	0	0	0	0	3.83333	0	0	0	0	0	0	0	0	0	0	0	0.5	1	0
246131		0	0	0	0	0	0	0	0	0	0	0	1.14286	0	0	0	0	0.5	0	0	0	0	0	0	0	0.5	0	0	0	0	0	0
429338		0	0	0	0	0	0	0	0	0	0	0	2	0	0	0	0	0	0	0	0	0	0	0	0	0	0	0	0	0	0	0
38405		0	0	0	0	0	0	1	0	0	3	0	0	0	0	0	0	1	0	0	0	0	0	0	0	0	0	0	0	0	0	0
264638		0	0	0	0	0	0	0	0	0	0	0	1	0	0	0	0	0	0	0	0	0	0	0	0	0	0	0	0	0	0	0
34008		1	0	0	0	3	0	0	0	0	0	0	0	0	0	0	0	0	0	0	0	0	0	0	0	2	0	0	0	0	0.1	0
75351		0	0	0	0	0	0	0	0	0	0	0.333333	0	0	0	0	0	0	0	0	0	0	0	0	0	0	0	0	0	0	0	0
546414		0	0	1	3.66667	13.2	0	0	0	0	1	0	2	0	0	0	0	3	0	0	0	0	0	0	0	2	0	1	0	0	0	0
66030		0	0	0	0	0	0	0	0	0	0	0.0884058	0	0	0	0	0	0	0	0	0	0	0	0	0.0181818	0	0	0	0	0	0	0
209769		0	28.2822	2	6.57244	22.9611	1.53333	1.18333	27.719	0	2.85	19.9095	0	0	0	0	0.561111	0.492857	0	0	0	0	26.8656	0	8.82619	2.15833	0	0.916667	31.6119	1	4.2	0
331678		1.5	0	0	0.00647249	34	0	0	0	0	0	0	0	0	0	0	5	3.5	0	0	0	0	0	0	0	0	0	0	0	3	0	0
471854		0.333333	0	1	0	20.75	0	0.5	1	0	0	0	4	1	0	0	0	5.5	0	0	0	0	0	0	0	22	0	0	1	3.5	0	0
6060		0.0434783	0	0	10.3214	3098.48	5.2	9.41667	0	0	8.00389	0	0	0	0	0	55.75	0	0	0	0	0	0	0	0	0	0	5	0	0	3	0
1042461		0	0	0	0	0	0	0	0	0	0	0	0	0	0	0	0	0	0	0	0	0	0	0	0	0	0.004	0	0	0	0	0
224471		6.25	55.5707	14	87.607	272.311	9.28571	51.5357	48.0546	0	19.4762	69.3982	11.5833	2.75	0	0	18.75	16.7	0	0	0	1	46.3055	0	19.3676	39.7333	0	24.5048	63.1866	18.75	33.6905	0
51241		0	0	0	0	0	0	0	0	0	0	0	0	0	0	0	0	0	0	0	0	0	0	0	0.0773858	0	0	0	0	0	0	0
33380		0	9	0	5.5	3	2.5	7.14286	0	10	9.9	3	1	0	0	0	0	1.5	3.83333	0	2	0	0	7.66667	0.333333	0	12.9167	3.67391	4	0	5	2.33333
1018		4	0	6.83333	0	2	2	0	1	0	0	0	55.1	7	0	0	0	7	0	0	0	0	0	0	0	6	0	0	0	5	0	0
942534		0	0.004	0	0	0	0	0	0.0156884	0	0	0.008	0	0	0	0	0	0	0	0	0	0	0.004	0	0	0	0	0	0	0	0	0
1125		1	0	1	0	10.5	0	2	0	0	0	1	1	1	0	0	0	8	0	0	0	0	0	0	0	2.33333	0	0	0	4	0	0
471821		0	0	0	0	1	0	0	0	0	0	0	6	2	0	0	1	0.5	0	0	0	0	0	0	0	0	0	0	0	0	0	0
120795		0	0	1	0	3	0	0	0	0	0	0	0	0	0	0	0	0	0	0	0	0	0	0	0	0	0	0	0	1	0	0
206150		0	0	0	0	0	0	0	0	0	0	0.110119	0	0	0	0	0	0	0	0	0	0	0	0	0.0986291	0	0	0	0	0	0	0
115392		0	0	0	0	0	0	0	0	0	0.00389105	0	0	0	0	0	0	0	0	0	0	0	0	0	0	0	0.228041	0	0	0	0	0
1029637		0	0	0	0	0.004	0	0	0	0	0	0.004	0	0	0	0	0	0	0	0	0	0	0	0	0	0	0	0	0	0	0	0
2806		2	0	0	0.5	0.333333	2	4	0	0	0	0	4.6	0	0	0	0	3.05405	0	0	0	0	0	0	0	0	0	2	0	1	2	0
7922		0	0	0	0	0	0	0	0	38.0435	0	0	0	0	6.13315	0	0	0	17.5932	0	11.0271	0	0	47.1249	0	0	10.0099	0	0	0	0	0.00990099
135613		22	20.0374	34.3333	146.446	2064.97	37.3333	110.343	11.77	1	55.4667	9.2	84.5	8.33333	0	0	283.893	82.4333	0	0	0	0	4.77	0	9.20204	86.0833	0	47.1742	17.5299	115.783	51.7513	0
431599		0	0	0	0	0	0	0	0	0	0.0153846	0	0	0	0	0	0	0	0	0	0	0	0	0	0	0	0	0.0042735	0	0	0.0303309	0
3880		0.2	0	1	1.5	2	1.5	3.5	1	1	0	0	8.26667	0	0	0	0	9.57576	2.33333	2	0	0	0	0	0	0	0	2.66667	0	1	5.5	0
455577		0	0	0	0	0	0	0	0	0	0	0	0.5	0	0	0	0	0	0	0	0	0	0	0	0	0	0	0	0	0	0	0
21571		0	0	0	0	0	0	0	0	3.7672	0	0	0	0	0.387536	0	0	0	2.42657	0	1.40879	0	0	11.2476	0	0	2.24159	0	0	0	0	0.00990099
281685		0	0	0	0	0	0	0	0	0	0	0	0	0	0	0	0	0	0	0	0	0	0	0	0	0	0	0.0042735	0	0	0	0
135760		0	0	0	0	0	0	0	0	0	0	0	0	0	0	0	0	0	0	0	0	0	0	0	0.00976287	0	0	0	0	0	0	0
8352		3	0.5	1	58.4354	21.8333	30.2222	68.5791	0.00204499	51.4701	48.5659	13.0794	7.33333	2	0.499817	1	2.5	3.90476	22.1028	0	4.56043	0	1	44.3027	5.03889	1.33333	28.1034	40.3333	2	2	33.1273	2.5099
1034538		0	0	0	0	0	0	0	0	0	0	0	0	0	0	0	0	0	0	0	0	0	0.00390625	0	0	0	0	0	0.00390625	0	0	0
1058		0	0	0	1	0.5	1	0	0	0	1	0	3	0	0	0	0	0.5	0	0	0	0	0	0	0	0	0	0	0	0	1	0
266639		0	0	0	0	0	0	0	0	0	0	0	0	0	0	0	0	0.004	0	0	0	0	0	0	0	0	0	0	0	0	0	0
7561		0	0	0	0	0	0	0	0	0	0	0	0	0	0	0	0	0	0	0	0	0	0	0	0.0964646	0	0	0	0	0	0	0
221997		0	0	0	0	0	0	0	0	0	0	0	0	0	0	0	0	0	0	0	0	0	0	0	0	0	0	0.0042735	0	0	0	0
347495		0.410256	0.0106195	0.05	0	0.142157	0	0	0.410256	0	0	0.289711	0.842721	0.0625	0	0	0	0.447712	0	0	0	0	0.663743	0	1	0	0	0	0	0	0	0
160791		4	1	256.083	29.3772	1506.57	8	28.5678	0	0	13.7	1	10	2	0	0	53.5333	6.33333	0	0	0	0	4	0	1	137.25	0	12.5566	2.66667	25.5	10.7198	0
338363		0	0	0	0	0	0	0	0.5	0	0	0	0	0	0	0	0	0	0	0	0	0	1	0	0	0	0	0	0	0	0	0
413842		1	0	0	0	0	0	0	0	0	0	0	0	0	0	0	0	0	0	0	0	0	0	0	0	0	0	0	0	0	0	0
84667		0	0	0	1	0	0	0	0	0	0	0	0	0	0	0	0	0	0	0	0	0	0	0	0	0	0	0	0	0	0	0
237631		0	0	0.214286	1	2	0	0.5	0	0	0	0	1	0	0	0	0	3	0	0	0	0	0	0	0	1	0	0	0	0	0	0
158878		0	0	0	0	0.112637	0	0	0.0416667	0	0	0	0.206838	0	0	0	0	0.0715198	0	0	0	0	0	0	0	0.220556	0	0	0	0.0357143	0	0
660122		0	1.5	0	0.5	1	1.33333	0	30.1667	0	0	1	0	0	0	0	0	1.5	0	0	0	0	182.417	0	0	0	0	0	4.5	0	0	0
355333		0	0	0	0	0	0	0	0	0	0	0	0	0	0	0	0	0	0	0	0	0	0	0	0	2	0	0	0	1	0	0
481643		0	0	0	0	0	0	0	0	0.0997532	0	0	0	0	0	0	0	0	0	0	0	0	0	0.0266127	0	0	0.00568182	0	0	0	0	0
456827		1	0	0	1	14	0	0	0	0	0	0	6	0	0	0	0	1	0	0	0	0	0	0	0	1	0	0	0	11.6667	0	0
120881		0	0	0	0	0	0	0	0	0	0	0	0	0	0	0	0	0	0.010101	0	0	0	0	0	0	0	0	0	0	0	0	0
711356		0	0	0	0	0	0	0	0.00371747	0	0	0	0	0	0	0	0	0	0	0	0	0	0	0	0	0	0	0	0	0	0	0
387662		0	0	0	0	0	0	0	0	0	0	0	1	0	0	0	0	0.5	0	0	0	0	0	0	0	0	0	0	0	0	0	0
743604		2	0	0	0	0	0	0	0	0	0	0	4	2	0	0	0	13	0	0	0	0	0	0	0	0	0	0	0	0	0	0
205141		0	0	0	0	0	0	0	0	0	0	0	0	0	0	0	0	0	0	0	0	1	0	0	0	0	0	0	0	0	0	0
927198		0	0	0	0	0	0	0	0	0	0	0	0	0	0	0	0	0	0	0	0	0	0.004	0	0	0	0	0	0	0	0	0
80368		0	0	0	0	0	1	0	0	0	0	0.176471	0	0	0	0	0	0	0	0	0	0	0	0	0	0	0	0	0	0	0	0
1088858		0	0.142857	0	0	0	0	0	0	0	0	0.5	0	0	0	0	0	0	0	0	0	0	0	0	0	0	0	0	0	0	0	0
1108803		0	0	0	0	0.004	0	0	0	0	0	0	0	0.483554	0	0	0	0	0	0	0	0	0	0	0	0	0	0	0	0	0	0
295349		2	0	0	0	0	0	0	0	0	2	0	21	5	0	0	0	4.5	0	0	0	0	0	0	0	0	0	0	0	0	0	0
698737		0	0.00530974	0	0	1.42857	0	0	0.333333	0	0	0	1.41026	0	0	0	0	0.75	0	0	0	0	0	0	0	0.5	0	0	0	2.25	0	0
243275		0	8	0	0.00647249	1	0	0	0	0	0	0	0	0	0	0	1	0.5	0	0	0	0	0.5	0	0	0	0	0	0	3.5	0	0
556282		4	0	0	0.203236	0	0	0	0	0	0	0	1	0	0	0	0	3	0	0	0	0	0	0	0	0	0	0	0	0	0	0
40315		0	0	0	0	0	0	1	0	0	0	0	0	0	0	0	0	0	0	0	0	0	0	0	0	0	0	0	0	0	0	0
714611		0	0	0	0	0	0	0	0	0	0	0	0	0	0	0	0	0	0.024	0	0	0	0	0	0	0	0	0	0	0	0	0
368456		0	0	0	0	0	0	0	0	0.185143	0	0	0	0	0	0	0	0	0.138373	0	0.00645161	0	0	0.0181818	0	0	0.120112	0	0	0	0	0
114453		0	0	0	0	0	0	0	0	0	0	0	0	0	0	0	0	0	0.004	0	0	0	0	0	0	0	0	0	0	0	0	0
933819		0	0	0	0	0	0	0	0	0	0	0	0	0	0	0	0	0	0.016	0	0	0	0	0	0	0	0	0	0	0	0	0
1123041		0	0.5	0	0	0	0	0	0.833333	0	0	0.5	0	0	0	0	0	0	0	0	0	0	0	0	0	0	0	0	0.5	0.5	0	0
138669		0	0	0	0	0	0	0.5	0	0	0	0	0	0	0	0	0	0	0	0	0	0	0	0	0	0	0	0	0	0	0	0
145630		0	0	0	0	0	0	0	0	0	0	0	0	0	0	0	0	0	0	0	0	0	0	0	0	0	0.008	0	0	0	0	0
29962		0	0	0	0	0	0	0.333333	0	0	0	0	0	0	0	0	0	0	0	0	0	0	0	0	0	0	0	0	0	0	0	0
451454		0	0	0	0.0472222	0	0	0.027027	0	0	0	0	0	0	0	0	0	0	0	0	0	0	0	0	0	0	0	0	0	0	0	0
82596		0	0	0	0	0	0	0	0	0	0	0	3.5	0	0	0	0	0	0	0	0	0	0	0	0	0	0.5	0.5	0	0	0.5	0
341668		0	0	0	1	0	0	0	0	1.83333	0	0	0	0	0	0	0	0	6.16667	0	1	0	0	0.5	0	0	5.33333	0	0	0	0	0
668607		3	0.000861326	1	0	2.33333	0	0	0.00379388	0	0	0	10	3	0	0	0	16.625	0	0	0	0	0	0	0	0	0	0	0.000861326	0	0	0
2961		0	0	0	0	0	0	0	0	0	0	0	0	0	0	0	0	0	0	0	0	0	0	0	0	0	0	1	0	0	0	0
504567		0	0	0	0	0.25	0	0	0	0	0	0	0	0	0	0	0.25	0	0	0	0	0	0	0	0	0	0	0	0	0	0	0
118531		0	0	0	0	0	0	0	0	0	0	0	0	0	0	0	0	0	0	0	0	0	0	0	0	0	0	0.125	0	0	0.166667	0
74970		0	0	0	1	1.33333	0	1	0	0	3	0	0	0	0	0	0	1	0	0	0	0	0	0	0	0	0	0	0	0	0	0
662005		0	0	0	0.0714286	0	0	0	0	0	0	0	0	0	0	0	0	0	0	0	0	0	0	0	0	0	0	0	0	0	0	0
63743		0	0	0	0	11	0	0	0	0	0	0	0	0	0	0	1	0	0	0	0	0	0	0	0	1.5	0	0	0	0	0	0
375451		16.1667	0	266	14.04	436.019	9.5	12.0833	0.5	0	8.25	0	274.795	45.8333	0	0	13.75	23	0	0	0	0	0	0	0	287.7	0	9	0	54.1667	12	0
99257		0	0	0	0	0	0	0	0	0	0	0	1	0	0	0	0	0	0	0	0	0	0	0	0	0	0	0	0	0	0	0
36913		0	0	0	6	0	0	2	0.5	4	1	0	2	1.5	0	0	0	0	10	0	1.5	0	0	6	0	0	3	0	0	0	1	0
929756		0	0	0	0	0	0	0	0.00371747	0	0	0	0	0	0	0	0	0	0	0	0	0	0.00371747	0	0.004	0	0	0	0	0	0	0
138775		0	0	0	0	0	0	0	0	0	0	0	0	0	0	0	0	0	0	0	0	0	0	0	0	1	0	0	0	1	0	0
43675		0	0.00265487	6	0	2	0	2	2	0	0	0	8.14286	1	0	0	0	0	0	0	0	0	1	0	2	0	0	0	0	0	0	0
210005		0	0	0	0	0	0	0	0	0	0	0	0	0	0	0	0	0	0	0	0	0	0	0	0.00976287	0	0	0	0	0	0	0
1056088		0	0	0	0	0	0	0	0	0	0	0	0	0	0	0	0	0	0	0	0	0	0.00398406	0	0	0	0	0	0	0	0	0
1126810		0	0	0	0	0	0	0	0	0	0	0	0	0	0	0	0	0	0	0	0	0	0.00796813	0	0	0	0	0	0	0	0	0
938808		0	0	0	0	0	0	0	0.00793651	0	0	0	0	0	0	0	0	0	0	0	0	0	0	0	0	0	0	0	0.00396825	0	0	0
710785		0	0	2	0	3	0	0	0.5	0	0	0	2.25	0	0	0	0	0	0	0	0	0	0	0	0	8.83333	0	0	0	0	0	0
2421		3	1	0	0	5.04167	0	0	0	0	0	0	10.5435	2	0	0	0	5	0	0	0	0	0	0	0	0	0	0	0	2	0	0
40542		1	0	0	0	2	0	0	0	0	0	0	11.1	2.25	0	0	0	2	0	0	0	0	1	0	0	1	0	0	0	3	0	0
5476		0	0	0	0	1.8	0	0	0	0.666667	0	0	3.46739	0	0	0	0	2.5	0	0	0	0	0	0	0	0	0	0	0	0	1	0
1118		811.19	4.00619	5	140.5	822.065	63.3333	238.208	7.33333	0	225.822	2	51.0833	10.1667	0	0	10.5952	2903.43	0	0	0	0	2.5	0	2	30.5833	0	143.545	1	25.75	234.867	0
5152		0	0	0	0	0	0	0	0	0	0	0	0	0	0	0	0	0	0	0	0	0	1.4	0	0	0	0	1	0	0	0	0
66821		0	0	0	0	0	0	0	0	0	0	0	0	0	0	0	0	0	0	0	0	0	0	0	0	0	0	0	0	1	0	0
7732		0	0	0	0	0	0	0	0	0	1	0	0	0	0	0	0	0	0	0	0	0	0	0	0	0	0	0	0	0	0	0
6938		0	0	0	0	0	0	0	0	2.54112	0	0	0	0	0.825415	0	0	0	0.258386	0	1.39074	0	0	10.0501	0	0	0.939068	0	0	0	0.5	0.10081
795080		0	0	0	0.5	0	0.5	0	0	0	0	0	0	0	0	0	0	0	0	0	0	0	0	0	0	0	0	0	0	0	0	0
193394		0	0	0	0	0	0	0	0	0	0	0	0	0	0	0	0	0	0	0	0	0	1	0	0	0	0	0	0	0	0	0
6806		0	0	0	0	0	0	0	0	0	1	0	0	0	0	0	0	0	0	0	0	0	0	0	0	0	0	0	0	0	0	0
1301		4.5	6.50088	4.6	0	11.619	0	1	13.2041	0	1	2	29.1833	11.5833	0	0	2	20.55	0	1	0	0	1	0	6	3.66667	1	0	4	13.3111	0	0
52797		0	0	0	0	0	0	0	0	0	0	0	0	0	0	0	0	0	0.0769231	0	0	0	0	0	0	0	0	0	0	0	0	0
531813		5	1	22.8333	6.75647	187.858	1.33333	5.08333	0.5	0	1.33333	1	10.5	2	0	0	12.0909	0	0	0	0	0	0.5	0	0	63.5	0	1.5	0.5	23	4.66667	0
1050656		0	0	0	0	0	0	0	0	0	0.004	0	0	0	0	0	0	0.00796813	0	0	0	0	0	0	0	0	0	0	0	0	0	0
182640		1	1	1.22222	2.83333	21.1667	0.5	0	0	0	0	0	9.5	0	0	0	0	4.5	0	0	0	0	0	0	1	0	0	1	0	0	0	0
644395		0	0.333333	0	0	0	0	0	0	0	0	0.333333	0	0	0	0	0	0	0	0	0	0	0	0	0	0	0	0	0	0	0	0
82805		0	0	0	0	0	0	0	0	0	0	0	0	0	0	0	0	0	0	0	0	0	0	0	0	0.5	0	0	0	0	0	0
316277		0	0	0	3.00324	26.5	0	0	0	0	0	0	2	0	0	0	0	1	0	0	0	0	0	0	0	1	0	0	0	8.16667	0	0
581389		0	0	0	0	0	0	0.5	0	0	0	0	0	0	0	0	0	0.111111	0	0	0	0	0	0	0	0	0	0	0	0	0	0
1004559		0	0	0	0	0	0	0	0	0	0	0.004	0	0	0	0	0	0	0	0	0	0.004	0	0	0	0	0	0	0	0	0	0
105560		0	24.2972	2	16.1719	77.9444	4	9.64286	14.0927	0	4.5	22.5371	2.5	1.75	0	0	4	8	0	0	0	0	9.0068	0	9.23677	13.2	0	5.86667	17.8752	1.25	6.5	0
104737		0	0	0	0.111111	0	0	1	0	0	0	0	0	0	0	0	0	0	0	0	0	0	0	0	0	0	0	0	0	0	0	0
1068625		1	0	0	0.0075188	0	0	0	0	0	0	0	0	0	0	0	0	0	0	0	0	0	0	0	0	0	0	0	0	0	0	0
749222		0	0	1	2	3	0	0	0	0	0	0	2	0	0	0	0	0	0	0	0	0	0	0	0	0	0	0	0	7	1	0
1090418		0	0	0	0	0	0	0.5	0.00395257	0	0	0	0	0	0	0	0	0	0	0	0	0	0.00395257	0	0	0	0	0	0	0	0	0
264068		0	0	0	0	0	0	0	0	0	0	0	0	0	0	0	0	0.333333	0	0	0	0	0	0	0	0	0	0	0	0	0	0
31453		1	0	0	0	0.333333	2	4	0	0	0	0	0	0	0	0	0	0.027027	0	0	0	0	0	0	0	0	0	2	0	0	2	0
145629		0	0	0	0.0909091	0	0	0	0	1	0	0	0	0	0	0	0	0	0	0	0	0	0	0	0	0	1.116	0	0	0	0	0
904400		0	0	0	0	0	0	0	0	0	0	0	0	0	0	0	0	0	0	0	0	0	0	0	0	0	0.004	0	0	0	0	0
216592		0.5	0.130403	0.0537037	1.02543	1.00971	0	1.03333	4.66418	0	1.01493	0.0430157	1	0.483554	0	0	0	0.0686217	0	0	0.0357143	0	0.0472394	0	0.052119	0.603768	0	0	0.0915678	2.0471	0.0344828	0
1109410		0	0	0	0	0	0	0	0	0	0	0	0	0	0	0	0	0	0	0	0	0.004	0	0	0	0	0	0	0	0	0	0
999250		0	0	0	0	0	0	0	0	0	0	0	0	0	0	0	0	0	0	0	0	0	0	0	0	0	0.004	0	0	0	0	0
292630		0	0	0	0	0	0	0	0	0	0	0	0	0	0	0	0	0	0	0	0	0	0	0	0	0	0	0	0	4	0	0
3208		1	2	0	12.661	1	8.72881	23.4684	20	2	13.0878	3	4.5	0	0	0	0	2	1	0	0	0	5	1	0	3	2.4	2.9661	1	0	6.80166	1
184208		0	0	0	0	0	0	8	0	0	2	0	0	0	0	0	0	0.25	0	0	0	0	0	0	0	0	0	3	0	0	2	0
259643		0	0	0	0	0	0	0	0	0	0	0	0	0	0	0	0	0	0	0	0	0	0	0	0	0	0.008	0	0	0	0	0
1004951		0.0714286	0	0	0	1	0	0	0.333333	0	0	0	1.40476	0	0	0	0	0.1	0	0	0	0	0	0	0	0	0	0	0	1	0	0
655817		0	0.0535167	0.153704	0.0254327	1.28039	0	0	208.161	0	0.0918484	0.118056	0.321429	0	0	0	0	0.0322581	0	0	0.0588235	0	1.02683	0	0.052119	0.309588	0	0	0.0889167	0.280959	0.0526316	0
8976		2.4	0	1	40.3333	9.43333	11.5	65.5682	0	29.5607	31.5906	15.3333	5.57143	2.13718	4.13735	0	3	10.7381	8.9198	0	6.01254	0	0.333333	64.9971	11.9948	0	14.4003	16.3333	0	0	26.4885	3.40314
328562		0	0	0	0	0.0344828	0	0	0	0	0	0	0	0	0	0	0	0	0	0	0	0	0	0	0	0	0	0	0	0	0	0
206379		4.55405	14.4445	13.8333	37.8943	242.7	11.6667	47	14.0732	0	16.125	9.38211	53.0833	6.5	0	0	15.1667	14.3333	0	0	0	0	7.51389	0	7.85486	19.1667	0	17.7667	10.9542	49.2333	20.6667	0
293824		0	0	0	0	0	0	0	0	0.0395725	0	0	0	0	0	0	0	0	0.396654	0	0.00980392	0	0	0.0105359	0	0	0.0648063	0	0	0	0	0
248888		0	0	0	0	0.004	0	0	0	0	0	0	0.00925926	0	0	0	0	0	0	0	0	0	0	0	0	0	0	0	0	0	0	0
434078		0	0	0	0	1	0	0	0	0	0	0	0	0	0	0	1	0	0	0	0	0	0	0	0	0	0	0	0	0	0	0
77686		0	0	0	0	0	0	0	0	0	0	0	0	0	0	0	0	0	0.010101	0	0	0	0	0	0	0	0	0	0	0	0	0
570		4.92072	106.535	2	11.8604	132.546	3.97619	7.5	586.188	0	7	99.3689	6.4	2.10997	0	0	4.30518	13.5	0	0	0	0	62.9895	0	16.0556	16.0062	0	5.76667	96.9058	22.9409	5.5	0
542455		3	0	2	0	6.5	0	0	0	0	1	0	25.125	2.33333	0	0	0	0	0	0	0	0	0	0	0	0	0	0	0	0	2	0
168670		0	0	0	0	0	0	0	0	0	0	0	0	0	0	0	0	0	0	0	0	0	0	0	0	0	0	1	0	0	0	0
883		0	1	0.333333	4	20.4	1.66667	1.83333	1	0	0.5	0.2	0.5	0	0	0	0.333333	5	0	0	0	0	2.4	0	0	5	0	0	0.5	2.66667	0.5	0
269797		0.2	0	0.5	0	0	0	0	0	0	0	0	2	0	0	0	0	0	0	0	0	0	0	0	0	0	0	0	0	0	0	0
106591		0	0	0	0	8.7193	0	0	0	0	0	0	0	0	0	0	1	0.0555556	0	0	0	0	0	0	0	0	0	1.4	0	0	0	0
146508		0	0	0	0	0	0	0	0	0	0	0	0	0	0	0	0	0	0	0	0	0	1.5	0	0	0	0	0	1	0	0	0
985080		0	0	0	0	0	0	0	0	0	0	0	0	0	0	0	0	0	0	0	0	0	0	0	0	0	0	0	0	0.277778	0	0
13335		0	0.0512793	0	0.00101112	0	0	0	0.00337838	0	0	0	0	0	0	0	0	0	0	0	0	0	0.00335571	0	0	0	0	0	0.0241094	0	0	0
1051063		0	0	0	0	0	0	0	0	1.5	0	0	0	0	0	0	0	0	5.66667	0	0	0	0	0	0	0	2.33333	0	0	0	0	0
6058		0	0	0	0.0120482	0	0	0	0	0	0.142857	0	0	0	0	0	0	0	0	0	0	0	0	0	0	0	0	0	0	0	0.333333	0
166035		0	0	0	0	0	0	0	0	0	0.00389105	0	0	0	0	0	0	0	0.024	0	0	0	0	0	0	0	0	0	0	0	0	0
6199		0	0	0	0	0	0	0	0	0.75	2	0	0	0	0	0	0	0	0	0	0	0	0	0	0	0	0	0	0	0	0	0
431600		0	0	0	0	0	0	0	0	0	0	0	0	0	0	0	0	0	0	0	0	0	0	0	0	0	0.004	0	0	0	0	0
342897		0	0	0	0	0.004	0	0	0	0	0	0	0	0	0	0	0	0	0	0	0	0	0	0	0	0	0	0	0	0	0	0
10243		0	0	0	0	0	0	0	0	0	0	0	0.875	0	0	0	0	0	0	0	0	0	0	0	0	0	0	0	0	0	0	0
1084360		0	0	0	0	0	0	0	0	0	0	0.004	0	0	0	0	0	0	0	0	0	0.004	0	0	0	0	0	0	0	0	0	0
295405		0.666667	0	0.583333	0	0	0	0	0	0	0	0	2.83333	1.33333	0	0	0.333333	2.66667	0	0	0	0	0	0	0	1.25	0	0	0	1.33333	0.666667	0
723612		0	0	0	0	0.5	0	0	0	0	0	0	1	0	0	0	0	0	0	0	0	0	0	0	0	13.0769	0	0	0	24.5	0	0
1027455		0	0	0	0	0	0	0	0	0	0	0	0	0	0	0	0	0	0.016	0	0	0	0	0	0	0	0	0	0	0	0	0
54304		0	0	0	0	0	0	0	0	0	0	0	0	0	0	0	0	0.5	0	0	0	0	0	0	0	0	0	0	0	0	0	0
933091		0.5	0	0	0	0	0	0	0	0	0	0	0	0	0	0	0	0	0	0	0	0	0	0	0	0	0	0	0	0	0	0
998086		0	0	0	0	0	0	0	0	0	0	0	0	0	0	0	0	0	0	0	0	0	0	0	0	0	0	0	0	1	0	0
652910		0	0	0	0	0	0	0	0	0	0	0	0	0	0	0	0	0	0.00505051	0	0	0	0	0	0	0	0	0	0	0	0	0
8330		0	0	0	0	0	0	0	0	0	0.333333	0	0	0	0	0	0	0	0	0	0	0	0	0	0	0	0	0	0	0	0	0
37972		0	0	0.0708749	0	0	0	0	0	0	0	0	0	0	0	0	0	0	0	0	0	0	0	0	0	0	0	0	0	0	0	0
55309		0	0	0	0	0	0	0	0	0	0	0	0	0.467511	0	0	0	0	0	0	0	0	0	0	0	0	0	0	0	0.0914691	0	0
58172		0	0	0	0	0	0	0	0	0	0	0	0	0	0	0	0	0	0	0	0	0	0	0	0.004	0	0	0	0	0	0	0
7241		0	0	0	0	3.33333	0	0	0	0	1	0	0	0	0	0	0	0	0	0	0	0	0	0	0	0	0	0	0	0	0	0
245713		0	0	0	0	0	0	0	0	0.5	0	0	0	0	0	0	0	0	0	0	0	0	0	0	0	0	0	0	0	0	0	0
51112		0	0	0	0	0	0	0	0	1	0	0	0	0	0	0	0	0	0	0	0	0	0	0	0	0	0	0	0	0	0	0
73010		0	0	0	0	5	0	0	0	0	0	0	0	0	0	0	0	0	0	0	0	0	0	0	0	0	0	0	0	0	0	0
138176		0	0	0	0	0	0	0	0	0	0.00389105	0	0	0	0	0	0	0	0	0	0	0	0	0	0	0	0	0	0	0	0	0
542390		1	0	0	0	0	0	0	0	0	0	0	4.5	0	0	0	0	0	0	0	0	0	0	0	0	0	0	0	0	0	0	0
999248		0	0	0	0	0	0	0	0	0	0	0	0	0	0	0	0	0	0	0	0	0	0	0	0	0	0.004	0	0	0	0	0
940296		0.0555556	0	0.333333	3.61038	2.01293	0.803114	3.51201	0	0	3.36438	0	0.117647	0	0	0	0.0769231	0.0555556	0	0	0	0	0	0	0.142857	0	0	1.89915	0	0	2.18044	0
237153		0	0	0	3.9	0	4.51014	6.48333	0	0	5.05628	0	0	0	0	0	0	0	0	0	0	0	0	0	0	0	0	1.3	0	0	2.59348	0
851736		0	0	0	0	0	0	0	0	1.86911	0	0	0	0	0	0.25	0	0	0.0666667	0	0.05	0	0	0	0	0	1.52414	0	0	0	0	0
102814		0	0	0	0	0	0	1	0	11.7355	0	0	0	0	3.55014	0	0	0	0.372937	0	5.36848	0	0	22.5427	0	0	5.07745	0	0	0	0	1.0396
119053		0	0	0	0	0	0	0	0	0	0	0	0	0	0	0	0	0	0	0	0	0	0	0	0	0	0	0	1	0	0	0
9722		0	0	0	0	0	0	0	0	0	0	0	0	0	0	0	0	0	0	0	0	0	0	0	0.222222	0	0	0	0	0	0	0
120882		0	0	0	0	0	0	0	0	0	0	0	0	0	0	0	0	0	0.010101	0	0	0	0	0	0	0	0	0	0	0	0	0
221988		1	0	2	0.833333	2	0	2	0	0	1	0	3	0	0	0	0	1.5	0	0	0	0	0	0	0	2	0	0	0	1	1	0
4956		2	0	0	1	1	2	1	0	0	0	0	1	1	0	0	0	1	0	0	0	0	0	0	0	0	2	0	0	0	0	0
107842		0	0	0	0	0	0	0	0	0	0	0	1	0	0	0	0	0	0	0	0	0	0	0	0	0	0	0	0	0	0	0
7049		0	0	0	1	0	0	0	0	0	0	0	0	0	0	0	0	0	0	0	0	0	0	0	0	0	0	0	0	0	0	0
28980		0	0	0	0.0472222	0	0	0.0627413	0	0	0	0	0	0	0	0	0	0	0	0	0	0	0	0	0	0	0	0	0	0	0.030303	0
256850		0	0.784324	0	0	0	0	0	1.15283	0	0	0.942686	0	0	0	0	0	0	0	0	0	0	0	0	0.161712	0	0	0	0.595	0	0	0
30955		0	0	0	0	0	0	0	0	0	0	0	0	0	0	0	0	0	0	0	0	0	0	0	0.00404858	1	0	0	0	0	0	0
274703		0	0	0	0	0	0	0	0	0	0	0	0	0	0	0	0	0	0	0	0	0	0	0	0.0114286	0	0	0	0	0	0	0
172918		0	0	0	0	0	0	0	0	0	0	0	0	0	0	0	0	0	0	0	0	0	0	0	0.0166667	0	0	0	0	0	0	0
138751		0	0	0	0	2.66667	0	0	0	0	0	0	0	0	0	0	0.333333	1	0	0	0	0	0	0	0	0	0	0	0	0	0	0
45349		8	0	35.3333	54.25	10.3333	22.5	67.25	0	32.4279	37.7599	0	72.8333	6	6.38639	1	2.33333	8.75	8.91667	0	10.8406	0	0	71.4074	0	49.5	14.4583	23.7935	0	13.5	29.5	4
45127		0	0	0	0	1	0	0	0	0	0	0	0	0	0	0	0	0	0	0	0	0	0	0	0	0	0	0	0	0	0	0
666292		0	0	0	0	0	0	0	0	0	1	0	0	0	0	0	0	0	0	0	0	0	0	0	0	0	0	0	0	0	0	0
104707		0	0	0	0	0	0	0	0	0	0	0	0	0	0	0	0	0	0.00505051	0	0	0	0	0	0	0	0	0	0	0	0	0
13488		6	0	0	3.5	0.0232558	1	6.75	22	1	2.03571	2728.29	0	0	0	0	0	1	0	1	0	9	168.9	0	3913.04	0	0.5	0.05	0	0	1.02703	0
6609		0	0	0	0	0	0	0	0	0	0	0	0	0	0	0	0	0	0	0	0	0	0	1	0	0	0	0	0	0	0	0
7826		0	0	0	0	0	0	0	0	3.66852	0.166667	0	0	0	0.799817	0	0	0	0.0932343	0	0.693768	0	0	4.2011	0	0	0.509901	0	0	0	0	0.00990099
63232		0	0	0	0	0	0	0	0	0	0	0	0	0	0	0	0	0	0	0	0	0	0	0	0	0	0	0.0042735	0	0	0	0
1051607		0	0.004	0	0	0	0	0	0.0156884	0	0	0.004	0	0	0	0	0	0	0	0	0	0	0.00390625	0	0.00390625	0	0	0	0	0	0	0
68346		0	0	0	0	0	0	0	0	0	0	0	17.75	13.7	0	0	0	0	0	0	0	0	0	0	0	0	0	0	0	0	0	0
2133		0	0	0	0	2	0	1	0	0	0	0	0.25	0	0	0	0	1	0	0	0	0	0	0	0	0	0	0	0	1	0	0
36327		0	0	0	1	0	0	0	0	0	0	0	0	0	0	0	0	0	0	0	0	0	0	0	0	0	0	0	0	0	1	0
32346		5	0	0.0078125	36.7682	4.5	9.16667	26.3118	1.71429	3.83333	25.6944	0	2.06667	0	0	0	9	7.74242	4	0	0	0	0	1	0	1.55191	1	13.45	0	2	11.3	0
34515		0	0	0	0	0	0	0	0	0	0	0	0	0	0	0	0	0	0	0	0	0	0	0	0	0	0.0135135	0	0	0	0	0
3487		0	0	0	0	0	0	0	0	0	0	0	0	0	0	0	0	0	0	0	0	0	0	0	0	0	0	0	0	0	0	0
1051582		0	0.0255976	0	0	0	0	0	0.0490019	0	0	0	0	0	0	0	0	0	0	0	0	0	0.00458716	0	0.00875294	0	0	0	0.0131229	0	0	0
1035731		0	0	0	0	0.004	0	0	0	0	0	0	0	0	0	0	0	0	0	0	0	0.004	0	0	0	0	0	0	0	0	0	0
767892		55.0667	0	11.5	10.5	251.833	0.5	4.5	0	0	5	0	633.733	69.8333	0	0	14.4	151.4	0	0	0	0	0	0	0	25.5	0	3.5	0	26.7	7	0
223927		0	0.0977398	0	2	0	0	0	0.0977328	0	1	0.0134228	0	0	0	0	0	0	0	0	0	0	0.0373333	0	0.0119365	0	0	0	0.0259225	0	0	0
99806		0	0	0	0.0472222	0	0	0.0627413	0	0	0	0	0	0	0	0	0	0	0	0	0	0	0	0	0	0	0	0	0	0	0.030303	0
315752		0	0	0	0	0	0	0.5	0	0	0	0	0	0	0	0	0	0	0	0	0	0	0	0	0	0	0	0	0	0	0	0
6033		0	0	0	2	0	0	0.5	0	0	0	0	0	0	0	0	0	0	0	0	0	0	0	0	0	0	0	0.5	0	0	1	0
169303		0	0	0	0	0	0	0	0	0	0	0	0.5	0	0	0	0	0	0	0	0	0	0	0	0	0	0	0	0	0	0	0
160492		0.2	5.64286	0	0.166667	9.95	0	0	10.1429	0	0.142857	0	0	0.2	0	0	0.5	0.647619	0	0	0	0	5	0	2	3.325	0	0	8.25	0.5	0	0
926		1.5	16.8478	1.5	32.9913	60.4333	2.14286	19.3929	12.9847	0	4.30952	25.6528	5	0	0	0	4	3	0	0	0	1	23.053	0	5.09801	5.33333	0	9.77143	29.2354	9	11.0476	0
198094		0.0769231	0	0.05	0	0.142157	0	0	0.251166	0	0	0.0361011	0.418478	0.0625	0	0	0	0.214379	0	0	0	0	0.441727	0	0	0	0	0	0.309524	0.125	0	0
114090		0	0.000884956	0	0	0	0	0	0	0	0	0	0	0	0	0	0	0	0	0	0	0	0	0	0	0	0	0	0	0	0	0
1088639		0	0	0	0	0	0	0	0	0	0	0.004	0	0	0	0	0	0	0	0	0	0	0	0	0	0	0	0	0	0	0	0
36814		0	0	2.5	1	13.75	0	0	0	0	0	1	5.87681	0	0	0	1.5	5.02439	0	0	0	0	1	0	0	2	0	0.0454545	0	0	0	0
28262		0	0	1	0	9.5	0	0	0	0	0	0	15.5	0	0	0	0.5	4	0	0	0	0	0	0	0	1	0	0	0	4.33333	0	0
76947		0	0	0	0	2	0	0	0	0	0	0	0	0	0	0	0	0	0	0	0	0	0	0	0	0	0	0	0	0	0	0
6137		0	0	0	5.23377	0	1	2	0	0	2.00389	0	0	0	0	0	0	0	0	0	0	0	0	0	0	0	0	1	0	0	0	0
117553		0	0	0	0	0	0	0	0	0	0	0	0	0	0	0	0	0	0.025	0	0.0196078	0	0	0	0	0	0.0192308	0	0	0	0	0
662		60.6629	3.02381	34.5095	14.4182	140.774	4.575	31.2203	3.10365	0	23.3815	3.032	60.4333	10.1389	0	0	6.71622	157.079	0	0	0	0	0.294444	0	0.875	41.4578	0	17.875	4.11535	127.702	6	0
33034		0	0	0	0	0	0	0	1	0	0	0	0	0	0	0	0	0	0	0	0	0	0	0	0	0	0	0	0	1	0	0
294746		0	0	0	1	3.83333	1	0	0	0	0	0	0	0	0	0	0.333333	0	0	0	0	0	1	0	0	2	0	0	0	0	0	0
6180		4.91304	0	0	13.8384	59	2	15.2081	0	12.1629	8.00389	5.04348	8	0	0	0	4	2.11111	11.9167	0	2	0	0.0526316	1	0.00555556	0	6.74737	7.25	0	0	5.66667	0
45128		0	0	0	0	1	0	0	0	0	0	0	0	0	0	0	0	0	0	0	0	0	0	0	0	0	0	0	0	0	0	0
335849		0	0	0	0	0	0	0	0	0	0	0	0	0	0	0	0	0	0	0	0	0	0.00398406	0	0	0	0	0	0	0	0	0
8007		0	0	0	2	0	2	3.25	0	0	0.5	0.5	0	0	0	0	0	0	0.25	0	0	0	0	0	1	0	0	2.25	0	0	0	0
637518		0	0	0	0	0	0	0	0	0	0	0	0	0	0	0	0	0	0	0	0	0	0	0	0	0	0.004	0	0	0	0	0
723590		0	0	0	0	0	0	0	0	0	0	0	0.416667	0	0	0	0	0	0	0	0	0	0	0	0	0	0	0	0	0	0	0
124		0	0	0	0	0	0	0	0	0	0	0	0	0	0	0	0	1	0	0	0	0	0	0	0	0	0	0	0	0	0	0
578833		45	33.3283	51	16.3333	340.851	3.25	25.15	21.362	0	6.67424	13.0661	25.65	2.91667	0	0	11.25	16.9333	0	0	0	0	29.0768	0	8.7136	36.0083	0	5.76948	17.0946	129.738	6.68182	0
262768		0	0	0	0	2.66667	0	0	0	0	0	0	0	0	0	0	0	1.2	0	0	0	0	0	0	0	0	0	0	0	0	0	0
725031		0	0	0	0	0	0	0	0	0	0	0	0	0	0	0	0	0	0	0	0	0	0	0	0.00555556	0	0	0	0	0	0	0
9821		0	0	0.0078125	13.4061	2	6.09848	25.502	1.00204	2.96127	13.2195	3.22222	0	0	1.2663	0	1.5	1.5	2.60314	0	1.38754	0	0	5.84982	6.51111	0.00645161	5.26689	8.25	0	0	5.08736	1.58647
860376		0	0	0	0	0	0	0	0	0	0.0114943	0	0	0	0	0	0	0	0	0	0	0	0	0	0	0	0	0.0042735	0	0	1.23077	0
319652		0	0.000884956	0	0	0	0	0	0	0	0	0	0	0	0	0	0	0	0	0	0	0	0	0	0	0	0	0	0	0	0	0
72060		0	0	0	0	0	0	0	0	0	0	0	0	0	0	0	0	0	0	0	0	0	0	0	0.0282814	0	0	0	0	0	0	0
433734		0	0	0	0	0	0	0	0	0	0.00389105	0	0	0	0	0	0	0	0	0	0	0	0	0	0	0	0	0	0	0	0	0
743059		0	0	0	0	1	0	0	0	0	0	0	0	0	0	0	0	0	0	0	0	0	0	0	0	0	0	0	0	0	0	0
1031709		0	6.8447	0	0	0.25	0	0	10.0048	0	0	0.619048	0.405052	0.142857	0	0	0	0.25	0	0	0.25	0.309524	10.5995	0	5.93929	0.125	0	0	12.4718	0	0	0
102317		0	0	0	0.125	0	0	0	0	0	0	0	0	0	0	0	0	0	0	0	0	0	0	0	0	0	0	0	0	0	0	0
9480		0	0	0	15.0246	0.7	1.64348	10.3442	0.00204499	8.14706	10.3205	2.16667	0	0.75	0	0	1	0	2.25	0	0.05	0	0	2.13793	0	0	1.89744	4.08333	0	1	5.18015	0
762550		0.166667	0.00442478	0	0	1.05882	0	0	0	0	0	0	1	0	0	0	0	1	0	0	0	0	0	0	0.5	0	0	0	0	0	0	0
37710		0	0	0	1	0	0	0	0	0	0	0	0	0	0	0	0	0	0	0	0	0	0	0	0	0	0	0	0	0	0	0
42852		0	0	0	0	0	0	0	0	0	0	0	0	0	0	0	0	0.333333	0	0	0	0	0	0	0	0	0	0	0	0	0	0
155077		2	0	11	6	181.75	0.5	9	1	0	8	1	23.9	1	0	0	4.97619	9.30882	0	0	0	0	0.5	0	0	18.8333	0	6.5	1	53.8571	4.66667	0
438753		2.14286	3	9.25	12.3333	195.583	1.5	8.58333	6.25	0	5.2	10.1167	7	0	0	0	8.5	0	0	0	0	0	1	0	1.25	17.9167	0	3.33333	3.33333	11.5	5.5	0
497704		0	0	0	0	0	0	0	0	0	0	0	0	0	0	0	0	0	0	0	0	0	0	0	0.00976287	0	0	0	0	0	0	0
212042		0	0	0	0.00323625	1	0	0	0	0	0	0	3	0	0	0	0	0	0	0	0	0	0	0	0	0	0	0	0	0	0	0
266673		0	0	0	0	0	0	0	0	0	0	0	0	0	0	0	0	0.004	0	0	0	0	0	0	0	0	0	0	0	0	0	0
629286		0	0	0	0	0	0	0	0	0.166667	0	0	0	0	1	0	0	0	0	0	0	0	0	1.33333	0	0	0	0	0	0	0	0
660051		0	0	0	0	0	0	0	0.00392157	0	0	0	0	0	0	0	0	0	0	0	0	0	0.00392157	0	0	0	0	0	0	0	0	0
6694		0	0	0	3	0	0.333333	3	0	0	1	0	0	0	0	0	0	0	0	0	0	0	0	0	0	0	0	3	0	0	1.66667	0
7222		0	0	0	7.95	1	3.5	5.36667	1	6	1	0	1	0	0	0	1	0.5	2	0	0	0	0	1	0	1	0	2.16667	0	0	1.16667	0
927079		0	0	0	0	0	0	0	0	0	0	0	0	0	0	0	0	0.142857	0	0	0	0	0	0	0	0	0	0	0	0	0	0
37061		0	0	0	0	0	0	0	0	0	1	0	0	0	0	0	0	0	0	0	0	0	0	0	0	0	0	0	0	0	0	0
1126004		0	0	0	0	0.004	0	0	0	0	0	0	0	0	0	0	0	0	0	0	0	0.004	0	0	0	0	0	0	0	0	0	0
1108359		0	0	0	0	0	0	0	0.004	0	0	0	0	0	0	0	0	0	0	0	0	0	0	0	0.00675676	0	0	0	0.01	0	0	0
351		3	9.25	13.3889	36.8667	331.483	6.75	25.95	9	0	6.5	9.25	14.2	0	0	0	15.7333	7.33333	0	0	0	0	5	0	1.5	23.5	0	10.25	4	32.8333	9.79167	0
580165		0.5	3.0115	0	0	2	0	0	4	0	0	4	3	0	0	0	0	1	0	0	0	0	4.625	0	0	0	0	0	0	3.25	0	0
1035720		0	0	0	0	0.004	0	0	0	0	0	0	0	0	0	0	0	0	0	0	0	0.004	0	0	0	0	0	0	0	0	0	0
1094352		0	0	0	0	0	0	0	0.0243418	0	0	0	0	0	0	0	0	0	0	0	0	0	0	0	0	0	0	0	0.00396825	0	0	0
395019		1	18.0112	5.33333	12.5123	18.6957	1.28571	5.33333	25.2718	0	4.01515	13.6452	1.83333	0	0	0	2.15385	0.666667	0	0	0	0	17.027	0	9.46414	10.8	0	2.18182	15.906	4.22222	3.98268	0
1072122		0	0	0	0	0	0	0	0.0569918	0	0	0.0627628	0	0	0	0	0	0	0	0	0	0	0	0	0	0	0	0	0	0	0	0
542383		2	0	16	0	0.5	0	0	0	0	0	0	6.5	0	0	0	0	1	0	0	0	0	0	0	0	4	0	0	0	0	0	0
251535		3.64286	0	0	0.00101112	1	0	0	0	0	0	0	5	1	0	0	0	2.16667	0	0	0	0	0	0	0	0	0	0	0	0	0	0
6863		0	0	0	0	0	1	1	0	0	0	0	0	0	0	0	0	0	2	0	0	0	0	0	0	0	0	0	0	0	0	0
11052		0	0.841818	0	0	0	0	0	2.5	0	0	1	0	0	0	0	0	0	0	1.08718	0	1.53391	1.18182	0	1.14815	0	0	0	0	0	0	0
57514		0	0	0	0	0.944444	0	0	0	0	0	0	1	0	0	0	0	0	0	0	0	0	0	0	0	0	0	0	0	0	0	0
136231		0	0	0	0	0	0	0	0	0	0	0	0	0	0	0	0	0	0	0	0	0	0	0	0.00976287	0	0	0	0	0	0	0
162027		2.33333	0	6.5	10.8398	49.6667	3.83333	16.5	1.5	0	4.25	0.5	6	0	0	0	3	17.5	0	0	0	0	1	0	0	15.8095	0	2	0	2.5	4	0
293400		1	0	0	0	0	0	0	0	0	0	0	1	2.165	0	0	0	1.08	0	0	0	0	0	0	0	0	0	0	0	0	0	0
927521		0	0	0	0	0	0	0	0	0	0	0	0	0	0	0	0	0	0	0	0	0	0.004	0	0	0	0	0	0	0	0	0
562024		0	0	0	0	0	0	0	0	0	0	0	0.0434783	0	0	0	0	0	0	0	0	0	0	0	0	0	0	0	0	0	0	0
314974		0	0	0	0	0.0151515	0	0	0	0	0	0	0	0	0	0	0	0	0	0	0	0	0	0	0	0	0	0	0	0	0	0
37572		0.25	0	0	2	0	0	3.5	0	6.72326	1	0	1	0	0.700415	0	0	1	2.90124	0	0.890738	0	0	11.6203	0	0	6.45157	1.66667	0	0	0	0.60081
745062		0	0	0	0.5	0	1.5	0	0	0	0	0	0	0	0	0	0	0	0	0	0	0	0	0	0	0	0	0	0	0	0	0
41356		0	0	0	0	0	0	1	0	1	0	0	0	0	0	0	0	0	0	0	0	0	0	0	0	0	0	0	0	0	0	0
582863		0	0.024359	0	0	0	0	0	0.0380694	0	0	0	0	0	0	0	0	0	0	0	0	0	0.0804604	0	0.0332719	0	0	0	0.0555462	0	0	0
887388		0	0	0.0270468	0	0	0	0	0	0	0	0	0	0	0	0	0	0	0	0	0	0	0	0	0	0	0	0	0	0	0	0
75546		0	0	0	0	0	0	0	0	1	0	0	0	0	0	0	0	1	0	0	0	0	0	0	0	0	0	0	0	0	0	0
41878		2	0	0	0	0	0	0	0	0	0.0155642	0	1.5	0	0	0	0	1	0	0	0	0	0	0	0	0	0	0	0	0	2	0
1027258		0	0	0	0	0	0	0	0	0	0	0.004	0	0	0	0	0	0	0	0	0	0	0	0	0	0	0	0	0	0	0	0
88345		0	0	0	0	0	0	0	0	0	0	0	0	0	0	0	0	0	0	0	0	0	0	0	0	0	0	0	0	0	1	0
319781		0	0	0	1	0	0	0	0	0	0.333333	0	0	0	0	0	0	0	0	0	0	0	0	0	0	0	0	0	0	0	0.5	0
561729		0	0	0	1	0	0	0	0	0	1	0	0	0	0	0	0	0	0	0	0	0	0	0	0	0	0	0	0	0	1	0
31265		0	0	0	1	0	0	0	0	0	1	0	0	0	0	0	0	0	0	0	0	0	0	0	0	0	0	1	0	0	0	0
465509		0	0	0	0	0	0	0	0	0	0	0	0	0	0	0	0	0	0	0	0	0	0	0	0	0	0	0	0	0	0	0
1112856		0	0	0	0	0.25	0	0	0	0	0	0.6	0	0	0	0	0	0	0	1.8	0	0.6	0.2	0	0	0	0	0	0	0	0	0
7033		0	0	0	0	0	0	0	0	0	1	0	0	0	0	0	0	0	0	0	0	0	0	0	0	0	0	0	0	0	0	0
34649		0	0	0	0	0	0	0	0	0	0	0	0	0	0	0	0	0	0	0	0	0	0	0	0	0	0	0.0042735	0	0	0.0147059	0
212403		0	0	3.28944	0	0	0	0	0	0	0	0	0	0	0	0	0	0	0	0	0	0	0	0	0	0	0	0	0	0	0	0
193175		0	0	0	0	0	0	0	0	0	0	0	0	0	0	0	0	1	0	0	0	0	0	0	0	0	0	0	0	0	0	0
70786		0	0	0	0	0	0	0	0	0	0	0	0	0	0	0	0	0	0	0	0	0	0	0	0.333333	0	0	0	0	0	0	0
75885		0	0	0	0	0	0	0	0	0	0.0363636	0	0	0	0	0	0	0	0	0	0	0	0	0	0	0	0	0	0	0	0	0
13554		0	0	0	0	0	0	0	0	0	0	0	0	0	0	0	0	0	0.336	0	0	0	0	0	0	0	0	0	0	0	0	0
443751		0	0	0	0	0	0	0	0	0	0	0	0	0	0	0	0	0	0	0	0	0	0	0	0.0292886	0	0	0	0	0	0	0
335975		0	0	0.0384615	0	0	0	0	0	0	0	0	0	0	0	0	0	0	0	0	0	0	0	0	0	0	0	0	0	0	0	0
981368		0.5	1.12857	2.66667	14.0762	32.2321	0.583333	4.2	0.833333	0	3.9	2.2	0.583333	0.5	0	0	1.58333	2.64286	0	0	0	0	2.95833	0	0.25	1.6	0	3.06667	4.17619	1.86667	3.16667	0
348605		0	0	0	0	0	0	0	0	0	0	0	0.333333	0	0	0	0	0	0	0	0	0	0	0	0	0	0	0	0	0	0	0
700821		0	0	0	0	0	0	0	0	0	0	0	0	0	0	0	0	0	0	0	0	0	0	0	0	0	0	0.0869565	0	0	0	0
2242		0	0	0	0	3.5	0	0	0	0	1	0	0	0	0	0	0	2.5	0	0	0	0	0	0	0	1	0	0.666667	0	0	0	0
311329		0	0	0	0	0	0	0	0	0	0	0	0	0	0	0	0	0	0	0	0	0	0	0	0.0964646	0	0	0	0	0	0	0
32061		1	2	2.16667	14.5	77.1667	3	13.5	6	0	9	0.5	6.66667	2	0	0	2.5	5.75	0	0	0	0	0	0	1	5.75	0	5	0	3	4.5	0
183939		4.5	0	1	0	12.8889	0	0	0	0	0	0	25.3333	4.45833	0	0	0	19.75	0	0	0	0	0	0	0	1	0	1	0	9.41667	0	0
83456		0	0	0	0	0.0535714	0	0	0	0	0	0	0	0	0	0	0	0	0	0	0	0	0	0	0	0	0	0	0	0	0	0
211878		0	0	0	0	0	0	0	0	0	0	0	0	0	0	0	0	0	0	0	0	0	0	0	0	0	0	0.0042735	0	0	0	0
644		2.33333	9	4	5.66667	114.73	3.5	5.13333	4.5	0	1.83333	6.5	5.5	0.983554	0	0	6.26351	3.75	0	0	0	0	3.54762	0	1.7	4.01299	0	6.16667	5.31111	10.8167	1.5	0
552536		0.142857	0.333333	0	0	0.0666667	0	0	0.215909	0	0	0	0.4	0	0	0	0	0.0625	0	0	0	0	0.5	0	0	0	0	0	0	0.333333	0	0
338963		0	0.5	6.5	7.5	24.25	4.5	6.33333	0	0	2.5	0	0	0	0	0	2	3	0	0	0	0	0	0	0.666667	18.7	0	2.16667	1	39.5	2	0
754521		0	0	0	0	5.33333	0	0	0	0	0	0	0	0	0	0	0	0	0	0	0	0	0	0	0	0	0	0	0	0.5	0	0
1802		0	0	0	0	0	0	0	0	0	0	0	0	0	0	0	0	0	0	0	0	0	0	0	0	0	0	0.0454545	0	0	0	0
400634		1	2.50796	5	0	0	0	0	4	0	0	4.25	7.58333	1.83333	0	0	0	5	0	0	0	0	4.16667	0	0	2	0	0	0	3.66667	0	0
927074		0	0	0	0	0	0	0	0	0	0	0	0	0	0	0	0	0.142857	0	0	0	0	0	0	0	0	0	0	0	0	0	0
2273		0	0	0	0	0	0	0	0	0	0	0	0	0	0	0	0	0	0	0	0	0	0	0	0	0	0	0	0	8	0	0
52627		0	0	0	0.0222222	0	0	0	0	0	0.0192757	0	0	0	0	0	0	0	0	0	0	0	0	0	0	0	0	1.00427	0	0	0.0303309	0.5
57616		0	0	0	0	0	0	0	0	0	0.0153846	0	0	0	0	0	0	0	0	0	0	0	0	0	0	0	0	0.0042735	0	0	0.0303309	0
3330		0	0	1	3.42424	0.333333	0.5	1.59091	0	2	0	0	1.61111	0	0	0	0	0	0	0	0	0	2	1	0	0	0	1.59091	0	1	2.5	0
214229		0	0	0	0.0472222	0	0	0.0627413	0	0	0	0	0	0	0	0	0	0	0	0	0	0	0	0	0	0	0	0	0	0	0.030303	0
469321		0	0	0	0	0	0	0	0	0	0	0	0	0	0	0	0	0	0	0	0	0	0	0	0	0	0	0	0	0	0.0588235	0
359164		0	0	0	0	0	0	0	0	0	0	0	0	0	0	0	0	0	0.008	0	0	0	0	0	0	0	0	0	0	0	0	0
292414		28.1667	0	314.791	13	309.788	4.66667	10.0833	0	0	8.5	0	259.031	27.3333	0	0	16.5	33.8333	0	0	0	0	0	0	0	325.9	0	5.5	0.5	73.9833	3	0
148365		0	0	0.0679724	0	0	0	0	0	0	0	0	0	0	0	0	0	0	0	0	0	0	0	0	0	0	0	0	0	0.0322581	0	0
299187		0	0	0	0	0	0	0	0	0	0	0	0	0	0	0	0	0	0	0	0	0	0	0	0	0.0434783	0	0	0	0	0	0
248468		0	0	0	0	0	0	0	0	0	0	0	0	0	0	0	0	0.0236686	0	0	0	0	0	0	0	0	0	0	0	0	0	0
304274		0	0	0	0	0	0	0	0	0	0	0	0	0	0	0	0	0	0	0	0	0	0	0	0.125	0	0	0	0	0	0	0
3646		2.5	65.3006	5	9.89744	63.1469	5.93333	10.6633	95.4211	44.674	7.25	54.1667	12	0	7.49473	0.375	4	8	10	0	7.0073	0	65.0323	113.891	47.3333	2	10.5	6.125	88.8333	3	5.4	1.5
175860		0	0	0	0	0	0	0	0	0	0	0	0	0	0	0	0	0	0	0	0	0	0	0	0	0	0.004	0	0	0	0	0
748102		0	0	0	0	0	0	0	0	0	0	0	0	4.06991	0	0	0	0	0	0	0	0	0	0	0	0	0	0	0	0.146269	0	0
7996		1	0	0	3.5	0.5	0.666667	5	0	4	3	60.3333	0	0	0	0	2	0	3	0	0	0	0	2	2	0	1.33333	2	0	0	0	0
996631		0	0	0	0	0	0	0	0	0	0.0192757	0	0	0	0	0	0	0	0.00505051	0	0	0	0	0	0	0	0	0.0042735	0	0	0.0303309	0
86044		0	0	0	1	0	0	2	0	0	0	0	0	0	0	0	0	0	0	0	0	0	0	0	0	0	0	0	0	0	0	0
191373		0	0	0	0	5.5	0	1	0	0	0	0	0	0	0	0	0	0	0	0	0	0	0	0	0	0	0	0	1	0	0	0
983328		0	0	0	0	0.2	0	0	0	0	0	0	0	0	0	0	0	0	0	0	0	0	0	0	0	0	0	0	0	0	0	0
2331		1.5	0	3	0.012945	7.33333	0	0	0	0	0	0	18.25	2	0	0	0	10.0833	0	0	0	0	0	0	0	0.1	0	0	0	4.83333	0	0
341045		0	6.83727	0	0	0	0	0	12.5178	0	0	2.33525	0	0	0	0	0	0	0	0	0	0	5.16548	0	3.38357	0	0	0	3.44538	0	0	0
1902		1.16667	2	2	0	16.475	0	1	0	0	0.5	2.25	8.65	0	0	0	0	3	0	0	0	0	3	0	1	4	0	0	1.5	2.125	0	0
760570		0	2	0	0	1	0	0	0	0	0	0	1.33333	1	0	0	0	0	0	0	0	0	0	0	0.2	0	0	0	1	0.5	0	0
52929		0.25	0	0	0	0	0	0	0	0	0.0153846	0	0	0	0	0	0	0	0.00505051	0	0	0	0	0	0	0	0.036	0.0042735	0	0	0.0303309	0
2001		0.166667	0	1.5	3.01942	42.0833	3	1	0	0	1	1	10	0	0	0	1	12	0	0	0	0	0	0	0	7.5	0	1.5	0	2	0.142857	0
743064		1	0	0	0	0	0	0	0	0	0	0	0	1	0	0	0	0	0	0	0	0	0	0	0	0	0	0	0	0	0	0
221146		0	0	0	0	0	0	0	0	0	0	0	0	0	0	0	0	0	0	0	0	0	0	0	0.00540541	0	0	0	0	0	0	0
170180		0	0	1	0	0	0	0	0	0	0	0	0	0	0	0	0	0	0	0	0	0	0	0	0	0	0	0	0	0	0	0
317811		0	0	0	0.5	0	0	1	0	0	0.5	0	0	0	0	0	0	0	0	0	0	0	0	0	0	0	0	0	0	0	0.5	0
5796		5	0	0	5.46154	5.004	2.32692	5.58654	0	3.85714	3.18108	0	7	0	0	0	0	6	0.4	0	0	0.25	0	1.28571	0	0	1	3.07692	0	1.08333	0.153846	0
1029718		1.5	0	0.5	0	1.66667	0	0.333333	0	0	0	0	2.41667	0	0	0	0	3.73333	0	0.5	0	0.5	0	0	0	0.125	0	0	0	1	0	0
3695		0	0	0	0	0	0	0	0	9	1	0	0	0	1	0	0	0	0	0	0	0	0	5	0	0	3	0	0	0	0	0
118576		0	0	0	0	0	0	0	0	0	0	0	0	0	0	0	0	0	0.00505051	0	0	0	0	0	0	0	0	0	0	0	0	0
414644		0	0	0	0	0.25	0	0	0	0	0	0	0	0	0	0	0	0	0	0	0	0	0	0	0	0	0	0	0	0	0	0
279585		0	0	0	0	4.81667	0	0	0	0	0	0	0	0	0	0	0	0	0	0	0	0	0	0	0	0	0	0	0	0	0	0
234876		0	0	0	0	0	0	0	0	0	0	0	0	0.483554	0	0	0	0	0	0	0	0	0	0	0	0	0	0	0	0	0	0
542413		0	0	0	0	0	0	0	0	0	0	0	0	0	0	0	0	0	0	0	0	0	0	0	0	0	0	0	0	0	1	0
30857		0	0	0	0	0	0	0	0	0	0	0	0	0	0	0	0	0	0	0	0	0	0	0	0.175439	0	0	0	0	0	0	0
170588		0	0	0	0.625	0	0	0	0	0	0.628571	0	0	0	0	0	0	0	0	0	0	0	0	0	0	0	0	0	0	0	0	0
570021		0	0	0	0	0	0.166667	0.25	0	0	0	0	0	0	0	0	0	0	0	0	0	0	0	0	0	0	0	0	0	0	0.25	0
58139		0	0	0	0	0	0	0	0	0	0	0	0	0	0	0	0	0	0	0	0	0	0	0	0	0	0	0	0	0	1	0
633351		0	0	0	0	0	0	0	0	0	0	0	0	0	0	0	0	1	0	0	0	0	0	0	0	2	0	0	0	0	0	0
864788		0	0	0	0	0.004	0	0	0	0	0	0.004	0	0	0	0	0	0	0	0	0	0.004	0	0	0	0	0	0	0	0	0	0
40343		0	0	0	0	0	0	0	0	0	0	0	0	0	0	0	0	0	0	0	0	0	0	0	0	0	0	0.0042735	0	0	0	0
117999		0	0	2	0	6.4	0	1	0	0	0	0	2	1	0	0	0	2	0	0	0	0	0	0	0.5	0	0	0	0	5	0	0
44386		0	0	0	0	0	0	0	0	0	0	0	0	0	0	0	1	0	0	0	0	0	0	0	0	0	0	0	0	0	0	0
523846		0	0	0	0	0	0	0	0	0	0	0	2.5	1	0	0	0	5	0	0	0	0	0	0	0	0	0	0	0	1	0	0
242395		0	0	0	1	0	1.83333	0	0	0	0	0	0	0	0	0	0	0	0	0	0	0	0	0	0	0	0	0	0	0	0	0
542526		0	0	0	0.030303	2.83333	0	0	0	0	0	0	1	0	0	0	0	1.5	0	0	0	0	0	0	0	0	0	0	0	0	0	0
227157		0	0	0	0	0.004	0	0	0	0	0	0	0.00925926	0	0	0	0	0	0	0	0	0	0	0	0	0	0	0	0	0	0	0
338565		0	9.77072	5	0.166667	14.6667	0	2	9.32697	0	1	7.25	1.575	1	0	0	0	2	0	0	0	0	2.2	0	1.00691	3.5	0	1	4.61299	5	0	0
688270		41.4762	0	493.083	4	36.4167	0	6	0	0.25	5.5	0	501.817	56.1667	0	0	2	83.3333	0	0	0	0	0	0	0	93.1667	0	1	0	81.5833	0	0
500765		0	0	0	0	0	0	0	0	0	0	0	0	0	0	0	0	0	0.0384615	0	0	0	0	0	0	0	0	0	0	0	0	0
89279		0.0769231	0	0	0	11	0	0	0	0	0	0	14.7167	10.0333	0	0	8.25	0.132479	0	0	0	0	0	0	0	0	0	0	0	0	0.5	0
1122255		0	0	0	0	0	0	0	0.02	0	0	0	0	0	0	0	0	0	0	0	0	0	0.008	0	0	0	0	0	0.008	0	0	0
410004		0	0	0	0.0183548	0	0	0	0	0	0	0	0	0	0	0	0	0	0	0	0	0	0	0	0	0	0	0	0	0	0	0
44122		0	0	0	0	0.004	0	0	0	0	0	0	0.00925926	0	0	0	0	0	0	0	0	0	0	0	0	0	0	0	0	0	0	0
759362		5.66667	0	24.5833	2.97333	69.6167	0	3.25	0	0	0.75	0	43.9719	8.83333	0	0	2.5	3.83333	0	0	0	0	0	0	0	69.5389	0	1.5	0	17.8333	1.75	0
117606		0	0	0	0	1	0	0	0	0	0	0	0	0	0	0	0	0	0	0	0	0	0	0	0	0	0	0	0	0	0	0
366602		4	7	24.3929	10.9444	107.833	0	4.83333	5.33333	0	3.7	3	3.5	0	0	0	7.5	5	0	0	0	0	2	0	1	36.8333	0	0.5	3.33333	24.25	9	0
187760		0	0	0	0	0	0	0	0	0	0.00389105	0	0	0	0	0	0	0	0	0	0	0	0	0	0	0	0	0	0	0	0	0
364548		0	0	0	0	0	0	0.00943396	0	0	0	0	0	0	0	0	0	0	0	0	0	0	0	0	0	0	0	0	0	0	0	0
114627		2	3	0	1	3	0	0.2	2.1	0	0	0	10.5833	3.5	0	0	0	10.6667	0	0	0	0	3.6	0	1	1	0.166667	0	0	5	0	0
59600		41.4762	0	493.083	4	36.4167	0	6	0	0.25	5.5	0	501.817	56.1667	0	0	2	83.3333	0	0	0	0	0	0	0	93.1667	0	1	0	81.5833	0	0
872309		0	0	0	0	0	0	0	0.004	0	0	0	0	0	0	0	0	0	0	0	0	0	0	0	0	0	0	0	0	0	0	0
311783		0	0	0	0	1	0	0	0	0	0	0	0	0	0	0	0	0	0	0	0	0	0	0	0	0	0	0	0	0	0	0
521096		1	0	0.5	1	10.7	1	0	3	0	0	0	4.83333	3	0	0	0.2	0.166667	0	0	0	0	2	0	0	2.5	0	0	0	2	0	0
75984		0	0	0	0	0	0	0	0.00204499	0	0	0	0	0.428571	0	0	0	0	0	0	0	0.25	0	0	0	0	0	0	0	0.333333	0	0
582204		0	0	0	0	0	0	0.00833333	0	0	0	0	0	0	0	0	0	0	0	0	0	0	0	0	0	0	0	0	0	0	0	0
882378		1	1.36645	3	12	28.5	1.83333	5.7	0.914835	0	6.33333	0.3	2.33333	0	0	0	1	2	0	0	0	0	0.371949	0	2.16595	2.83333	0	3.16667	1.85261	2	4	0
42895		0	0.142857	0	0	0	0	0	0	0	0	0	0	0	0	0	0	0	0	0	0	0	0	0	0	0	0	0	2	0	0	0
34143		0	0	0	0	0	0	0	0	0	0	0	0.5	0	0	0	0	0	0	0	0	0	0	0	0	0	0	0	0	0	0	0
933820		0	0	0	0	0	0	0	0	0	0	0	0	0	0	0	0	0	0.016	0	0	0	0	0	0	0	0	0	0	0	0	0
1086523		0	0	0	0	0	0	0	0.00395257	0	0	0	0	0	0	0	0	0	0	0	0	0	0	0	0	0	0	0	0	0	0	0
31468		1	0	0	0	0	0	0	0	0	0	0	3.1	0	0	0	0	0.027027	0	0	0	0	0	0	0	0	0	0	0	1	0	0
483		0	0	0	0	0	0	0	0	0	0	0	1	0	0	0	0	0	0	0	0	0	0	0	0	0	0	0	0	0	0	0
1090433		0	0	0	0	0	0	0	0.00395257	0	0	0	0	0	0	0	0	0	0	0	0	0	0.00395257	0	0	0	0	0	0	0	0	0
114657		0	0	0	0.169492	0	0.135593	0.233326	0	0	0.152542	0	0.2	0	0	0	0	0	0	0	0	0	0	0	0	0	0	0.0169492	0	0	0.103977	0
663915		0	0	0.147619	0	1.03468	0	0	0	0	0	0	0	0	0	0	0.027027	0.0416667	0	0	0	0	0	0	0	0.275974	0	0	0	1.84286	0	0
90126		0	0	0	0	0	0	0	0	0	0	0	0	0.483554	0	0	0	0	0	0	0	0	0	0	0	0	0	0	0	0	0	0
206251		0	0	0.142857	0	0	0	0	0	0	0	0	0	0	0	0	0	0	0	0	0	0	0	0	0	0	0	0	0	0	0	0
97247		0	0	0	0	0	0	0	0	0	0.0153846	0	0	0	0	0	0	0	0	0	0	0	0	0	0	0	0	0.0042735	0	0	0.0303309	0
151416		0	0	0	0	1	0	0.117647	0	0	0	0	0	0	0	0	0	0	0	0	0	0	0	0	0	0	0	0	0	0	0	0
743101		0	0	0	0	0	0	0	0	0	0	0	0	0	0	0	0	1	0	0	0	0	0	0	0	0	0	0	0	0	0	0
121475		0	0	0	0	52.9333	0	0	0	0	0	0	0	0	0	0	0	0	0	0	0	0	0	0	0	0	0	0	0	0	0	0
118624		0	0	0	0	0	0	0	0	0	0	0	0	0	0	0	0	0	0.00505051	0	0	0	0	0	0	0	0	0	0	0	0	0
399726		0	0.170206	0.111111	0	0.352778	0	0	0.0242424	0	0	0	1.39167	0.3	0	0	0	0.7	0	0	0	0	0.0510204	0	0	0	0	0	0.0445349	0.5	0	0
7983		0	0	0	0	0	0	0	0	0	0	0	0	0	0	0	0	0	0	0	0	0	0	0	0.00404858	0	0	0	0	0	0	0
4767		0	0	0	0	0	0	0	0	0	0	0	0	0	0	0	0	0	0	0	1	0	0	0	0	0	1	0	0	0	0	0
542511		0	0	0	0	0	0	0	0	0	0	0	0	0	0	0	0	0	0	0	0	0	0	0	0	0	0	0	0	1	0	0
1047783		0	0	0	0	0	0	0	0	0	0	0.004	0	0	0	0	0	0	0	0	0	0	0	0	0	0	0	0	0	0	0	0
483338		0	0	0	0	0.222222	0	0	0	0	0	0	0	0	0	0	0	0	0	0	0	0	0	0	0	0	0	0	0	0	0	0
146785		1	0	0	2	18.7	1	1.25	0	0	0.5	0	0	0	0	0	0	0	0	0	0	0	0	0	0	0	0	0.5	0	2	2	0
59814		0	0	0	0	0	0	0	0.004	0	0	0	0	0	0	0	0	0	0	0	0	0	0	0	0	0	0	0	0	0	0	0
219049		0	0	0.062037	0.428571	4.16667	0	0	0	0	0	0	0	0	0	0	1	0.228	0	0	0	0	0	0	0	0	0	0	0	0	0	0
857907		0	0	0	0	0	0	0	0	0	0	0	0	0	0	0	0	0	0	0	0	0	0	0	0	0	0	0.0454545	0	0	0	0
204728		0	0	0	0	0	0	0	0	0	0	0	0	0	0	0	0	0	0	0	0	0	0	0	0	1	0	0	0	0	0	0
6045		0	0	0	35.8462	270.826	8	38.75	0	0	14	0	0	0	0	0	3	0	0	0	0	0	0	0	0	0.1	0	13	0	0	13.9167	0
34601		0	0	0	0	0	1	0	0	0	0	0	0	0	0	0	0	0	0	0	0	0	0	0	0	0	0	0	0	0	0	0
884218		0	0	0	0	0	0	0	0	0	0	0	0	0	0	0	0	0	0	0	0	0	0	0	0	0	0.004	0	0	0	0	0
1114557		0	0.008	0	0	0	0	0	0.008	0	0	0	0	0	0	0	0	0	0	0	0	0	0	0	0	0	0	0	0.004	0	0	0
654128		0	2	0	0	3	0	0	2	0	0.0344828	4	0	0	0	0	0	0	0	0	0	0	2	0	0	0	0	0	5	0	0	0
329444		0	0	0	0	0	0	0	0	0.0174097	0	0	0	0	0	0	0	0	0.0264167	0	0	0	0	0	0	0	0.0208063	0	0	0	0	0
1032719		0	0	0	0	0	0	0	0	0	0	0	0	0	0	0	0	0	0	0	0	0	0	0	0	0	0	0	0.00395257	0	0	0
452333		1	2	0	3.5	5	1	10	10	0	4.1763	4	0.5	0	0	0	0	2	0	0	0	0	2.5	0	0	0.5	0	3	5	1	2	0
198214		0.166667	0.254593	0.303228	0.0254327	0.503997	0	0.0571429	1.16282	0	0.0149254	0	0.284483	0	0	0	0	0.0590909	0	0	0.0357143	0	0.0472394	0	0.025092	0.125	0	0	0.128917	0.253181	0	0
165446		0	0	0	0	0	0	0	0	0	0	0	2	0	0	0	0	0	0	0	0	0	0	1	0	0	5	0	0	0	0	0
931046		0	0	0	0	0	0	0	0.004	0	0	0	0	0	0	0	0	0	0	0	0	0	0	0	0	0	0	0	0	0	0	0
7628		0	0	0	4	0	0	2	0	0	1.16667	0	0	0	0	0	0	0	0	0	0	0	0	0	0	0	0	0	0	0	0	0
363767		0	0	0	0	0	0	0	0	0	0	0	0	0	0	0	0	0	0	0	0	0	0	0	0	0	0.004	0	0	0	0	0
4536		0	0	0	0	0	0	0	0	0	0	0.0217391	0	0	0	0	0	0	0	0	0	0	0	0	0.0181818	0	0	0	0	0	0	0
27553		0	0	0	0	0	0	1	0	1	2	0	0	0	0	0	0	0	0	0	0	0	0	0	0	0	0.5	0	0	0	0	0
361189		0	0	0	0.133333	0	0	0.266667	0	0	0.0666667	0	0	0	0	0	0	0	0	0	0	0	0	0	0	0	0	0	0	0	0	0
127537		0	0	0	0	1	0	0	0	0	0	0	0	0	0	0	0	0	0	0	0	0	0	0	0	0	0	0	0	0	0	0
1007965		0	0	0	0	0	0	0	0	0	0	0.004	0	0	0	0	0	0	0	0	0	0	0	0	0	0	0	0	0	0	0	0
3593		0	0	0	0	0	0	0	0	0	0	0	0	0	0	0	0	0	0	0	0	0	1	0	0	0	0	0	0	0	0	0
451756		0	0	0	0	0	0	0	0	0	0	0	0	0	0	0	0	1	0	0	0	0	0	0	0	0	0	0	0	0	0	0
413067		1	0	0	0	1.5	0	0	0	0	1	0	6	1	0	0	0	10	0	0	0	0	0	0	0	0	0	1	0	0	1	0
627230		0	0	0	0	0	0	0	0	4	0	0	0	0	0	0	0	1	0	0	0	0	0	0	0	0	0	0	0	0	0	0
306901		0	0	0	0.333333	2	0	0	6.75	0	0	0	1	0	0	0	0	0	0	0	0	0	29	0	0	0	0	0	0	1	0	0
168275		0	0	0	0	0	0	0	0	0	1	0	0	0	0	0	0	0	0	0	0	0	0	0	0	0	0	0	0	0	0	0
89593		74.1476	71.5727	14.5995	729.019	261.594	306.615	865.843	173.638	1353.42	616.533	3899.06	49.5452	9.88718	5428.31	8169.15	81.6905	121.673	1946.2	29.5	11398.7	32.439	616.879	8858.66	5918.03	14.647	1219.57	365.827	105.563	21.9384	357.949	25.5202
186801		104.879	33.3301	28.9742	18.5396	299.69	7.5	18.5333	67.0428	0	13	18.2454	602.508	85.15	0	0	17.75	303.9	0	4	0	1	45.2307	4	7.5	61.9333	0.333333	8.41667	20.7843	249.286	13	0
85149		0	0	0	0	0	0	0	0	0	0	0	0	0	0	0	0	0	0.00505051	0	0	0	0	0	0	0	0	0	0	0	0	0
1409		0	0	0	0	0	0	0	1	0	0	0	0	0	0	0	0	0	0	0	0	0	0	0	0	0	0	0	0	0	0	0
100860		0	0	1	2	2.5	0	6	0	0.025	1	0	1	0	0	0	0	1	0	0	0	0	0	0	0	0	0	2	0	0	3	0
42467		0	0	0	0	5	0	0	0	0	0	0	0	0	0	0	0	0	0	0	0	0	0	0	0	0	0	0	0	0	0	0
368466		0	0	0	0	0	0	0	0	0.0434619	0	0	0	0	0	0	0	0	0.038961	0	0	0	0	0	0	0	0.0227273	0	0	0	0	0
57986		0	0	0	0	0	0	0	0	0	0	0	0	0	0	0	0	0	0	0	0	0	0	0	0.00555556	0	0	0	0	0	0	0
34503		0	0	0	0	0	0	0	0	0	0	0	0	0	0	0	0	0	0	0	0	0	0	0	0	0	2	0	0	0	0	0
9739		0	0	0	0	0	0	0	0	0	0	0	0	0	0	0	0	0	0	0	0	0	0	0	0.111111	0	0	0	0	0	0	0
329450		0	0	0	0	0	0	0	0	0	0	0	0	0	0	0	0	0	0.048	0	0	0	0	0	0	0	0	0	0	0	0	0
13105		0	0	0	0	0	0	0	0	0	0	0.047619	0	0	0	0	0	0	0	0	0	0	0	0	2.59863	0	0	0	0	0	0	0
367158		0	0	0	0	0	0	0	0	0	0	0	0	0	0	0	0	0	0	0	0	0	0.00371747	0	0.004	0	0	0	0	0	0	0
35493		30.5488	76.605	12.0469	92.6825	140.581	50.798	121.56	125.845	361.897	68.6336	115.667	124.717	8.99233	90.4368	5.83333	8.5	76.6162	103.338	8.78205	126.396	11.1635	139.587	1499.86	51.4825	17.0387	116.903	56.7436	96.7474	19.5995	51.6115	18.3248
43692		0	0	0	0	0	0	0	0	0	0	0	0	0.0149254	0	0	0	0	0	0	0	0	0	0	0	0	0	0	0	0.0914691	0	0
979		63.8333	0	632.933	0	43.1667	1	2	0	0	4.5	0	548.15	79.6667	0	0	2	116.583	0	0	0	0	0	0	0	124.167	0	3	0	81.0833	3	0
3603		4.61071	0.166667	1	8.03333	6.66667	0.35119	11.2857	1	1	3.7	0	4.33333	0	0	0	1	6.13571	5	1.91667	0	3	3	0	0	1	0	0.625	0.857143	2	3.92593	0
232264		1	0	0	0	0	0	0	0	0.25	1	0	0	0	0	0	0	0	0	0	0	0	0	0	0	0	0	0	0	0	0	0
414621		0	0	0	0	0.25	0	0	0	0	0	0	0	0	0	0	0	0	0	0	0	0	0	0	0	0	0	0	0	0	0	0
29007		0	0	0	0	0	0	0	2	0	0.0344828	0	1	0	0	0	0	0	0	0	0	0	0	0	0	0	0	0	0	0	0	0
593117		0	0	0	0	0	0	0	0	0	0	0	0	0	0	0	0	0.0909091	0	0	0	0	0	0	0	0	0	0	0	0	0	0
541742		0	0	0	0	0	0	0	0	0	0	0	0	0	0	0	0	0	0	0	0	0	0	0	0.00675676	0	0	0	0.01	0	0	0
267890		32.1314	4.44397	173.357	13.7111	374.227	5	60.9872	8.79868	0	62.6	5.8836	123.336	13	0	0	15.6801	67.8833	0	0	0	0	3.02633	0	2.22465	70.6905	3	24.75	5.46419	1024.75	9.55556	0
243404		0	0	0	0	0	0	0	0	0	0	0	0.25	0	0	0	0	0	0	0	0	0	0	0	0	0	0	0	0	0	0	0
117769		0	0	0	0	1	0	0	0	0	0	0	5.75	0.25	0	0	0	1	0	0	0	0	0	0	0	0	0	0	0	0	0	0
766733		0.4	0	0	0	0	0	0	0	0	2	0	0	0	0	0	0	0	2	0	0	0	0	1	0	0	5	0	0	0	0	0
758487		0	0	0	0	0	0	0	0	0	0	0	0	0	0	0	0	0	0.032	0	0	0	0	0	0	0	0	0	0	0	0	0
50671		0	0	0	0	1	0	0.5	0	0	2	0	0	0	0	0	0	0	0	0	0	0	0	0	0	1	0	0	0	0	0	0
1707		1.83333	0	12	1	9.2381	0	1	0	0	0	1	21.0333	1	0	0	0.4	5.67619	0	0	0	0	0	0	0.5	2.66667	0	2	0	0.5	1	0
655174		0	0	0	0	0	0	0	0	0	1	0	0	0	0	0	0	0	0	0	0	0	0	0	0	0	0	0	0	0	0	0
1090673		0	0	0	0	0.004	0	0	0	0	0	0.004	0	0	0	0	0	0	0	0	0	0.004	0	0	0	0	0	0	0	0	0	0
165436		1.15385	0	7	0	4	0	0	0	0	1	0	12.5	17.75	0	0	0	3	0	0	0	0	0	0	0	1	0	0	0	2	0	0
8038		0	0	0	0	0	0	0	0	0	0	0	0	0	0	0	0	0	0	0	0	0	0	0	0.00404858	0	0	0	0	0	0	0
1090374		0	0	0	0	0	0	0	0.00395257	0	0	0	0	0	0	0	0	0	0	0	0	0	0.00395257	0	0	0	0	0	0	0	0	0
653733		3	0	1	0.583333	32	0	2	0	0	0.5	0	1	1	0	0	0	0	0	0	0	0	0	0	0	5	0	0	0	4.5	0	0
45669		0	0	0	0	0	0	0	0.016	0	0	0	0	0	0	0	0	0	0	0	0	0	0	0	0	0	0	0	0	0	0	0
660912		0	0	0	0.0714286	0	0	0	0	0	0	0	0	0	0	0	0	0	0	0	0	0	0	0	0	0	0	0	0	0	0	0
353569		0	0	0	0	0	0	0	0.00204499	0	0	0	0	0	0	0	0	0	0	0	0	0	0	0	0	0	0	0	0	0	0	0
356623		0	1.5	0	0	0	0	0	56	0	0	1	0	0	0	0	0	0	0	0	0	0	1	0	19.5	0	0	0	2	0	0	0
938082		6	0	0	0	1	0	0	0	0	0	0	7	6	0	0	0	1	0	0	0	0	0	0	0	0	0	0	0	0	0	0
247835		0	0	0	0	0	0	0	0	0	0	0	0	0.0625	0	0	0	0	0	0	0	0	0	0	0	0	0	0	0	0	0	0
997126		0	0.00389105	0	0	0	0	0	0	0	0	0	0	0	0	0	0	0	0	0	0	0	0	0	0	0	0	0	0	0	0	0
914247		0	0	0	0	0.0227273	0	0	0	0	0	0	0	0	0	0	0	0	0	0	0	0	0	0	0	0	0	0	0	0	0	0
55730		0	0	0	0	0	0	0	0	0	0	0	0	0	0	0	0	0	0.48	0	0	0	0	0	0	0	0	0	0	0	0	0
120436		0	0	0	0	0	0	0	0	0	0	0	0	0	0	0	0	0	0.768	0	0	0	0	0	0	0	0	0	0	0	0	0
795638		0	0	0	0	12	0	0	0	0	0	0	0	0	0	0	13.5	0	0	0	0	0	0	0	0	0	0	0	0	0	0	0
516534		0	0	0	0	0	0	0	0	0	0	0	0	0	0	0	0	1	0	0	0	0	0	0	0	0	0	0	0	0	0	0
40677		0	0	0	0.454545	0	0	1	0	0	1	0	0	0	0	0	0	0	0	0	0	0	0	0	0	0	0	0	0	0	0	0
8009		0	0	0	2	0	2	3.25	0	0	0.5	0	0	0	0	0	0	0	0.25	0	0	0	0	0	0	0	0	2.25	0	0	0	0
451365		0	0	0	0	0	0	0	0.00204499	0	0	0	0	0	0	0	0	0	0	0	0	0	0	0	0	0	0	0	0	0	0	0
52195		0	0	0	0	0	0	1	0	0	0	0	0	0	0	0	0	0	0	0	0	0	0	0	0	0	0	0	0	0	0	0
266265		1	19.7108	7.25	17.3721	44.25	3.5	20.5	14.2618	0	7.2	16.6054	6.2193	0	0	0	3.5	2.33333	0	0	0	0	16.9954	0	5.7638	14.5229	0	2	20.5763	9.60714	6	0
416005		0	0	0	0	0	0	0	0	0	0	0	0	0	0	0	0	0	0.032	0	0	0	0	0	0	0	0	0	0	0	0	0
1035719		0	0	0	0	0.004	0	0	0	0	0	0	0	0	0	0	0	0	0	0	0	0.004	0	0	0	0	0	0	0	0	0	0
41030		0	0	0	0	0	0	0	0	0	0	0	0	0	0	0	0	0	0	0	0	0	0	0	0	0	0	0	0	0	0.823529	0
554819		0	0.609649	0	0	0	0	0	1.75325	0	0	0.112121	0	0	0	0	0	0	0	0	0	0	0.406593	0	0.666667	0	0	0	1.09454	0	0	0
264275		0	0	0	0.0909091	0	0	0	0	0	0	0	0	0	0	0	0	0	0	0	0	0	0	0	0	0	0	0	0	0	0	0
118592		0	0	0	0	0	0	0	0	0	0.00389105	0	0	0	0	0	0	0	0.00505051	0	0	0	0	0	0	0	0	0	0	0	0	0
681645		0	0	0	0	0.47619	0	0	0	0	0	0	0.12439	0	0	0	0	0	0	0	0	0	0	0	0	0	0	0	0	0	0	0
204918		0	0	0	0	0	0	0	0	0	0	0	0	0	0	0	0	0	0	0	0	0	1	0	0	0	0	0	0	0	0	0
231250		0	0	0	0	0	0	0	0	0	0.0153846	0	0	0	0	0	0	0	0	0	0	0	0	0	0	0	0	0.0042735	0	0	0.196998	0
498214		0	0	0	0	0.25	0	0	0	0	0	0	3.87302	0.111111	0	0	0	3.50758	0	0	0	0	0	0	0	0	0	0	0	1.60794	0	0
1007970		0	0	0	0	0	0	0	0	0	0	0.004	0	0	0	0	0	0	0	0	0	0	0	0	0	0	0	0	0	0	0	0
28221		40.3095	14.4773	113.033	112.6	1237.07	40.0833	108.833	17.0571	0	35.7833	15.7	107.038	24.0833	0	0	88.9444	250.264	0	0	0	0	20.4905	0	2.66667	231.518	0	42.1667	19.6143	658.206	35.8333	0
86661		5.42308	28.5165	2.9	2.33333	21.1157	0	1	53.9109	0	1.125	26.6158	50.2958	7.33333	0	0	0	20.2856	0	0	0	0	33.792	0	10.5	6.50645	0	1.66667	26.6905	17.6359	0	0
37894		0	0	0	0	0	0	0	0	0	0	0	0.25	0	0	0	0	0	0	0	0	0	0	0	0	0	0	0	0	0	0	0
870563		0	0	0	0	0	0	0	0	0	0	0	0	0	0	0	0	0	0.00505051	0	0	0	0	0	0	0	0	0	0	0	0	0
27829		0	0.5	0	0	0	0	0	0.5	0	0	0	0	0	0	0	0	0	0	0	0	0	0	0	0	0	0	0.042735	0	0	0	0
214908		0	0	0	0	0	0	0	0.04	0	0	0	0	0	0	0	0	0	0	0	0	0	0	0	0	2	0	0	0.0434783	0	0	0
369890		0	0	0	0	0	1	0	0	0	0	0	0	0	0	0	0	0	0	0	0	0	0	0	0	0	0	0	0	0	0	0
866345		0	0	0	0	0	0	0	0	0	0	0	0	0	0	0	0	0.0238095	0	0	0	0	0	0	0	0.142857	0	0	0	0.0902778	0	0
9307		2	0	0	1	0	0	1	0	0	0	0	0	0	0	0	0	0	0	0	0	0	0	0	0	0	1	0	0	0	0	0
43845		9	0	1.67448	64.1682	23	21	60.7118	2.71429	14.8333	47.9611	0	6.4	2.83333	0	0	11.6667	14.8091	6	0	0	0	0.533333	4	1	4.73372	8	29.2833	0	2	27.1	1
325284		0	0	0	0	0	0	0	0	0	0	0	0	0	0	0	0	1	0	0	0	0	0	0	0	0	0	0	0	0	0	0
940284		0	0	0	0.125	0	0	0	0	0	0	0	0	0	0	0	0	0	0	0	0	0	0	0	0	0	0	0	0	0	0	0
84301		0	0	0	0	0	0	0	0	0	0	0	0	0	0	0	0	0.00591716	0	0	0	0	0	0	0	0	0	0	0	0	0	0
560996		0	0	0	0	0	0	0	0	0	0	0	0	0	0	0	0	0	0	0	0	0	0	0	0	0	0	0.0042735	0	0	0.0303309	0
869002		0	0	0	0	0	0	0	0	0	0	0	0	0	0	0	0	0.004	0	0	0	0	0	0	0	0	0	0	0	0	0	0
221354		0	0	0	0	0	0	0	0	0	0	0	0	0	0	0	0	0.00416667	0	0	0	0	0	0	0	0	0	0	0	0	0	0
9779		1	0	0	19.5909	2	4.54348	9.3968	0	2.16667	7.43089	2.16667	0	0	0	0	2	1.5	0	0	0	0	0	2.25	0.5	0	0.976923	5.3	0	1	10.5333	0
455586		0	0	0	0	1	0	0	0	0	0	0	3.5	2	0	0	0	0.5	0	0	0	0	0	0	0	0	0	0	0	0	0	0
1005790		0	0.0165996	0	0	0	0	0	0.0200924	0	0	0	0	0	0	0	0	0	0	0	0	0	0.00423729	0	0.00396825	0	0	0	0.00423729	0	0	0
560978		0	0	0	0	0	0	0	0	0	0.0307692	0	0	0	0	0	0	0	0	0	0	0	0	0	0	0	0	0.00854701	0	0	0.0606618	0
4606		0	0	0	0	0	0	0	0	0	0	0.0326087	0	0	0	0	0	0	0	0	0	0	0	0	0.0181818	0	0	0	0	0	0	0
641777		0	0	0	0	9.57143	0	0	0	0	0	0	0	0	0	0	1.83333	0	0	0	0	0	0	0	0	0	0	0	0	0	0	0
70852		0	0	0	0	0	0	1	0	0	0	0	0	0	0	0	0	0	0	0	0	0	0	0	0	0	0	1	0	0	0	0
383630		0	0	0	0	0	0	0	0	0	0	0	1.7482	2.57681	0	0	0	0	0	0	0	0	0	0	0	0	0	0	0	0	0	0
433625		0	0	0	0	0.004	0	0	0	0	0	0	0	0	0	0	0	0	0	0	0	0	0	0	0	0	0	0	0	0	0	0
9481		0	0	0	15.0246	0.7	1.64348	10.3442	0.00204499	8.14706	9.3205	2.16667	0	0.75	0	0	1	0	2.25	0	0.05	0	0	2.13793	0	0	1.89744	4.08333	0	1	5.18015	0
108520		0	0	0	0	0	0	0	0	0	0	0	0	0	0	0	0	0	0	0	0	0	0	0	0	0	0.0135135	0	0	0	0	0
1108490		0	0.008	0	0	0	0	0	0.0159683	0	0	0	0	0	0	0	0	0	0	0	0	0	0.004	0	0.004	0	0	0	0.004	0	0	0
36827		4.36667	1.25	0	0	2.5	0	0	0.934524	0	0.166667	0	20.6627	7.56944	0	0	0	17.0985	0	0	0	0	0	0	0	0	0	0	0	4.92302	0	0
5581		0	0	0	0	0	0	0	0	0	0	0	0	0	0	0	0	0	0	0	0	0	0.0514464	0	0	0	0	0	0	0	0	0
412861		0	0	0	0	0	0	0	0.0345874	0	0	0	0	0	0	0	0	0	0	0	0	0	0.0185874	0	0.012	0	0	0	0	0	0	0
6914		0	0	0	0	0	0	1	0	0	0	0	0	0	0	0	0	0	0	0	0	0	0	0	0	0	0	0	0	0	1	0
589342		3	0	0	0	1	1	0	0	0	0	0	3.33333	0	0	0	0	5.69369	0	0	0	0	0	0	0	0	0	0	0	0	0	0
907457		0	0	0	0	0	0	0	0	0	0	0	0	0	0	0	0	0	0.096	0	0	0	0	0	0	0	0	0	0	0	0	0
216816		2.2	0.166667	1	9.4	7.04274	1	5.8	5.33333	0	2.9	0	4.71429	0	0	0	0	2	0	0	0	0	0.4	0	0	0	0	2.71818	0	2	1.71429	0
213468		2	1	1	9.50324	51.5	1	2.5	0	0	1	2	3	0	0	0	1	3	0	0	0	0	1	0	0.5	7	0	2.5	0	10.1667	0	0
7119		0	0	0	0	0	0	0	0	0	0	0	0	0	0	0	0	0	2	0	0	0	0	0	0	0	8	0	0	0	0	1
484380		0	0	0	0	0	0	0	0	0	0	0	0	0	0	0	0	0	0	0	0	0	0	0	0	0	0	0	0	0.309524	0	0
61679		0	0	0	0.0625	0	0	0	0	0	0	0	0	0	0	0	0	0	0	0	0	0	0	0	0	0	0	0	0	0	0	0
240818		0	0	0	0	0	0	0	0	0	0.0192757	0	0	0	0	0	0	0	0.0370505	0	0	0	0	0	0	0	0.008	0.0042735	0	0	0.0303309	0
1095859		0	0	0	0	0	0	0	0	0	0	0	0	0	0	0	0	0	0	0	0	0	0.00390625	0	0.00390625	0	0	0	0	0	0	0
43263		0	0	0	0	0	0	1	0.378968	0	0	0.142857	0	0	0	0	0	0	0	0	0	0	0.142857	0	0.309524	0	0	0	0.253968	2	0	0
587821		0	0	0	0	0	0	0	0	0	0	0	0	0	0	0	0	0	0	0	0	0	0	0	0	0	0	0	0.25	0	0	0
177452		0	0	0	0	0	0	0	0	0	0	0	0	0	0	0	0	0	0.00505051	0	0	0	0	0	0	0	0	0.0042735	0	0	0	0
308745		0	0	0	0.08	0	0.0196078	0.02	0	0	0	0	0	0	0	0	0	0	0	0	0	0	0	0	0	0	0	0	0	0	0	0
69583		0	0	0	0	0	0	0	0	0.4	0	0	0	0	0	0	0	0	0	0	0	0	0	0	0	0	0	0	0	0	0	0
1076190		0	0	0	0	0	0	0	0	0	0	0	0	0	0	0	0	0	0.016	0	0	0	0	0	0	0	0	0	0	0	0	0
188937		0.8	0	0	0	0	0	1	0	0	0	0	1	0	0	0	0	0	0	0	0	0	0	0	0	0	0	0	0	4	0	0
290396		0	0	0	0	0	0	0	0	0	0	0	0	0	0	0	0	0	0	0	0	0	0	0	0	0.111111	0	0	0	0	0	0
999278		0	0	0	0	0	0	0	0	0	0	0	0	0	0	0	0	0	0	0	0	0	0	0	0	0	0.004	0	0	0	0	0
431666		0	0	0	0	0.004	0	0	0	0	0	0	0.00925926	0	0	0	0	0	0	0	0	0	0	0	0	0	0	0	0	0	0	0
47707		0	0	0	0	0	0	0	0	0	0	0.047619	0	0	0	0	0	0	0	0	0	0	0	0	0.241486	0	0	0	0	0	0	0
41361		0	0	0	0	0	0	1	0	0	0	0	0	0	0	0	0	0	2	0	0	0	0	1	0	0	2	0	0	0	0	0
236244		0	0	0	0	0	0	0	0	0	0	0	0	0	0	0	0	1	0	0	0	0	0	0	0	0	0	0	0	0	0	0
743558		0	0	0	0	0	0	0	0	0	0	0	0	0	0	0	0	2.5	0	0	0	0	0	0	0	0	0	1	0	0	0	0
39952		0	0	0	0	0	0	0	1	0	0	0	0	0	0	0	0	0	0	0	0	0	0	0	0	0	0	0	0	0	0	0
1084521		0	0.0158888	0	0	0	0	0	0.0198413	0	0	0	0	0	0	0	0	0	0	0	0	0	0	0	0.00396825	0	0	0	0.00396825	0	0	0
75399		0	0	0	0	0	0	0	0	0	0	0	0	0	0	0	0	0	0	0	0	0	0	0	0	1	0	0	0	0	0	0
687800		0	0	0	0	0	0	0	0	0	0	0	0	0	0	0	0	4	0	0	0	0	0	0	0	0	0	0	0	0	0	0
489646		0	0.0166667	0	0	0	0	0	0.0380694	0	0	0	0	0	0	0	0	0	0	0	0	0	0.0689661	0	0.0265152	0	0	0	0.0455462	0	0	0
6416		0	0	0	0	0	0	0	0	0	2	0	0	0	0	0	0	0.2	1.172	0	0	0	0	0	0	0	0	0.25	0	0	0	0
3659		0	0	0	1.01205	0	4	0	0	0	0	0	0	0	0	0	0	1	0	0	0	0	0	0	0	0	0	0	0	0	0.012987	0
1076181		0	0	0	0	0	0	0	0	0	0	0	0	0	0	0	0	0	0.016	0	0	0	0	0	0	0	0	0	0	0	0	0
21472		0	0	0	0.0606061	0	0	0	0	0	0	0	0	0	0	0	0	0	0	0	0	0	0	0	0	0	0	0	0	0	0	0
936476		2	1	4	0.333333	13.7077	0.333333	5	1	0	0	0	21.5	2.5	0	0	0	7.83333	0	0	0	0	0	0	0	11	0	1.66667	0	91.8333	0	0
680		0	0.0194553	0	0	0	0	0	0	0	0	0	0	0	0	0	0	0	0	0	0	0	0	0	0	0	0	0	0	0.333333	0	0
8826		0	0	0	0	0	0	0	0	0	0	0	0	0	0	0	0	0	0	0	2	0	0	0	0	0	0	0	0	0	0	0
244320		0.166667	0.268696	0.161376	0.0254327	0.335492	0	0.0333333	0.952153	0	0.0149254	0.0454545	0.1	0.0769231	0	0	0	0.559091	0	0	0	0	0.0280086	0	1.10843	0.0557594	0	0	0.068716	0.0640506	0	0
36156		0	0	0	0	0	0	0	0	0	0	0	0	0	0	0	0	0	0	0	0	0	0	0	0	0	0	0.0434783	0	0	0	0
33072		2	0	0	12.4	11.25	1	7.83333	0	0	4	1	0	0	0	0	0	1	0	0	0	0	0	0	0	2.5	0	1.56667	0	2	6.7	0
1082811		0	0	0	0	0	0	0	0	0	0	0	0	0	0	0	0	0.004	0	0	0	0	0	0	0	0	0	0	0	0	0	0
358574		3	0.0119206	1	0	51.3333	0	1	0.0357779	0	1	0	4.33333	0	0	0	1	2.5	0	0	0	0	0	0	0.00796825	0	0	0	0	0	1	0
378381		0	0	0	0	0	0	0	0	0.0304816	0	0	0	0	0	0	0	0	0.159476	0	0	0	0	0.0105359	0	0	0.027258	0	0	0	0	0
7735		0	0	0	64.1742	36.0833	25	77.9167	0	18.5	65.6769	0	0	0	0	0	16	2.5	8.0101	0	1	0	0	0.5	1.01111	0	9.5	30.5	0	1	31.3333	2
83143		0	0	0	0	0	0	0	0	0	1	0	0	0	0	0	0	0	0	0	0	0	0	0	0	0	0	0	0	0	0	0
515618		0	0	0	0.00202225	0	0	0	0	0	0	0	3	0	0	0	0	2.5	0	0	0	0	0	0	0	0	0	0	0	1	0	0
81032		6	0	91.8333	1.83333	114.104	0	4.5	0	0	3	0	8.7	2	0	0	3.5	34.8333	0	0	0	0	0	0	0	463.333	0	1.5	0	764	1	0
1003110		0	0	3.5	3	5.75	3	2.25	0	0	2.5	0	6.16667	1	0	0	0	5.7	0	0	0	0	1	0	0	2.16667	0	0	0	0	2	0
379395		0	0	0	0	0	0	0	0	0	0	0	0.333333	0	0	0	0	3	0	0	0	0	0	0	0	0	0	0	0	0	0	0
6650		0	0	0	0	0	0	0	0	1	0	0	0	0	0	0	0	0	8.912	0	0	0	0	2	0	0	6.02703	0	0	0	0	0
160618		1.5	0	0	0	1.5	0	1.07692	0	0	0	0	0	0	0	0	0	10	0	0	0	0	0	0	0	0	0	0	0	0	0	0
85683		0	0	0	0	9	0	0	0	0	0	3.23333	0	2	0	0	0	1	0	0	0	0	2	0	1	0	0	0	0	0.5	0	0
8400		0	0	0	0.166667	0	0	2	0	1.5	0	0	0	0	0	0	0	0	1	0	0	0	0	1	1	0	4	0	0	0	0	0
44535		0	0	0	1	0	0	2	0	0	0	0	0	0	0	0	0	0	0	0	0	0	0	0	0	0	0	0	0	0	0	0
1680		0	2.16667	0	0	1.66667	0	0	0	0	0	0	0	1	0	0	0	0.2	0	0	0	0	1	0	0	0	0	0	0	0	0	0
2879		0	0	0	0	0	0	0	0	0	0	0	0	0	0	0	0	2	0	0	0	0	0	0	0	0	0	0	0	0	0	0
55134		0	0	0	0	0	0	0	0	0	0	0	0	0	0	0	0	0	0	0	0	0	0	0	0.00555556	0	0	0	0	0	0	0
4043		0.0666667	0	0	0	0	0	0	0	0	0	0	0	0	0	0	0	0	0	0	0	0	0	0	0	0	0	0	0	0	0	0
335927		0	0	1	0	0	0	0	0	0	0	0	0.427632	1	0	0	0	0	0	0	0	0	0	0	0	0	0	0	0	0	0	0
421695		0	0	0	0	0	0	0.00943396	0	0	0	0	0	0	0	0	0	0	0	0	0	0	0	0	0	0	0	0	0	0	0	0
60919		0	0	13	0	6.5	1	0	0	0	0	0	14.5789	0	0	0	0	3.06667	0	0	0	0	0	0	0	3.5	0	1	0.0666667	0	0	0
42156		0	0	0	0	0	0	0	0	0	0	0	0	0	0	0	0	0	0	0	0	0	0	0	0	0	4	0	0	0	0	1
455067		0	0	0	0	0	0	0	0	0	0	0	0	1	0	0	0	0	0	0	0	0	0	0	0	0	0	0	0	0	0	0
290402		3	0	0	0	2.83333	0	0	1	0	0	0	31.0833	4.11111	0	0	0	7.33333	0	0	0	0	0	0	0	2	0	0	0	15.0667	0	0
412420		0	0	0	0	0	0	0	0	0	0	0	0	0	0	0	0	0	0	0	0	0	0	0	0.0526316	0	0	0	0	0	0	0
28228		11.8333	0	17	1	12	0	2	2	0	3	0	44.5	6	0	0	0	24.1667	0	0	0	0	0	0	0	23	0	0.5	0	183.4	0.333333	0
434131		0	0	0	3	1.5	1	1.2	0	0	1	0	1.5	0	0	0	0	0.5	0	0	0	0	0	0	0	0	0	2	0	0	1	0
32335		1	0	0	7.45	0	3	8	0	2	2	0	0	1	0	0	0	4	0	0	0	0	0.2	0	0	0	1	0	0	0	4.46667	0
933093		0.484921	0.00258398	0	0.3	3.11468	0	1.5	0.0113816	0	0.666667	0	3.54048	0.512195	0	0	0.166667	2.18373	0	0	0	0	0	0	0	0.236111	0	0	0.00258398	0.311111	0.176923	0
434756		0	0	0	0	0	0	0	0	1	0	0	0	0	0	0	0	0	1	0	0	0	0	0	0	0	0	0	0	0	1	0
165392		0	0	0	0	0	0	0	0	0	0	0	0	0	0	0	0	0.25	0	0	0	0	0	0	0	0	0	0	0	0	0	0
41		1	0	4	1	21.5	2	4.47619	0	0	2.5	0	0.5	0	0	0	2	9.86667	0	0	0	0	0	0	0	2.5	0	6	0	7	0	0
302485		0	0	0	0	2	0	0	0	0	0	0	2	0.672932	0	0	0	0	0	0	0	0	0	0	0	0	0	0	0	0	0	0
927080		0	0	0	0	0	0	0	0	0	0	0	0	0	0	0	0	0.142857	0	0	0	0	0	0	0	0	0	0	0	0	0	0
59943		0	0	0	0	0	0	0	0	0	0.0385513	0	0	0	0	0	0	0	0.010101	0	0	0	0	0	0	0	0	0.00854701	0	0	0.0606618	0
985006		0	0.00530974	0	0	0.112637	0	0	0.0416667	0	0	0	0.174564	0	0	0	0	0.0715198	0	0	0	0	0	0	0	0.0955556	0	0	0	0.0357143	0	0
111663		0	0	0	0	0	0	0	0	0	0	0	0.2	0	0	0	0	0	0	0	0	0	0	0	0	0	0	0	0	0	0	0
2223		0.5	0	1.33333	0	7.5	0	0	0	0	0	0	0	0	0	0	0	0	0	0	0	0	0	0	0	0	0	0	0	0	0	0
9612		1.8	0	0	11.4352	3.2	7.58333	20.1988	4	4.5	10.995	1	1.1	0	0	0	2	2	2.16667	0	0	0	17	1	1.01667	0.111111	2.31069	6.83333	0	1	3.08333	0
76528		0	0	0	0	0	0	0	0	0	0	0	0	0.0155425	0	0	0	0	0	0	0	0	0	0	0	0	0	0	0	0	0	0
41997		0	0	0	0	0	0	0	0.0769231	0	0	0.142857	0	0	0	0	0	0	0	0	0	0	0	0	0	0	0	0	0	0	0	0
542406		0	0	0	0	0	0	0	0	0	0	0	1	0	0	0	0	0	0	0	0	0	0	0	0	0	0	0	0	0	0	0
153663		0	0	0	0	0	0	0	0	0	0	0	0	0	0	0	0	0	0	0	0	0	0.0119522	0	0	0	0	0	0	0	0	0
481653		0	0	0	0	0	0	0	0	2.24737	0	0	0	0	0	0	0	0	5.08333	0	0	0	0	1.02661	0	0	2.83333	0	0	0	0	0
71240		15.7631	66.5872	10.0312	44.0044	102.664	24.9393	58.415	100.508	203.089	36.6845	56.3667	101.439	5.45066	31.0287	4.5	6.5	51.2591	65.0705	8.78205	75.667	11.1635	71.8656	585.296	48.4815	9.02581	60.5238	33.1818	91.734	13.0995	21.9769	12.2969
480118		9	0	1.67448	64.1682	23.5	23	61.7118	2.71429	14.8333	51.4611	0	7.4	2.83333	0	0	11.6667	14.8091	6	0	0	0	4.53333	4	1	4.73372	8	32.5768	1	2	27.1	1
65736		0	0	0	0	0	0	0	0.00925926	0	0	0	0	0	0	0	0	0	0	0	0	0	0	0	0	0	0	0	0	0	0	0
8081		0	0	0	0.0075188	0	0	0	0	4.40174	0.176871	0	0	0	2.86973	0	0	0	2.58333	0	3.29063	0	0	18.6824	4	0	1.225	0	0	0	0.166667	0
896		1.25	1	8	0.00323625	46.3333	0	2	0	0	0	0	0	0	0	0	2	8.83333	0	0	0	0	0	0	0	2.5	0	1	0	22.8889	0	0
179479		0	0	0	0	0	0	0	0.00840336	0	0	0	0	0	0	0	0	0	0	0	0	0	0	0	0	0	0	0	0	0	0	0
716659		0	2	0	0	0	0	1	1	0	0	2	0	0	0	0	0	0	0	0	0	0	3	0	0	1	0	0	0	0	0	0
1071604		0	0	0	0	0	0	0	0	0	0.00389105	0	0	0	0	0	0	0	0.004	0	0	0	0	0.004	0	0	0	0	0	0	0	0
34371		0	0	0	0	0	0	0	0	0	0	0	0	0	0	0	0	1	0	0	0	0	0	0	0	0	0	0	0	0	0	0
265570		2	0	1	0	2	0	1	0	0	0	0	2.5	0	0	0	0	2	0	0	0	0	0	0	0	6	0	0	0	52.9333	0	0
200642		0	0	0	0	0	1	0	0	0	0	0	0	0	0	0	0	0	0	0	0	0	0	0	0	0	0	0	0	0	0	0
336723		12	0	0	1	0	0	0	0	0	0	0	9.66667	2	0	0	0	49.5	0	0	0	0	0	0	0	0	0	0	0	0	0	0
212194		0	0	0	0	0	0	0	0	0	0	0	0.142857	0	0	0	0	0	0	0	0	0	0	0	0	0	0	0	0	0	0	0
308587		0	0	0	4.64286	0	3.25	3	0	0	6.75	0	0	0	0	0	0	0	0	0	0	0	0	0	0	0	0	1.25	0	0	4.5	0
345073		0.340909	0	0	0.888889	4.91808	0.45	0.25	0.285714	0	0.535714	0	0.5	0.722222	0	0	0	1.12558	0	0	0	0	0	0	0.25	0.5	0	0.25	0	1.66865	0	0
35143		1	0	0	0	0	0	0	0	0	0	0	0	0	0	0	0	0	0	0	0	0	0	0	0	0	0	0	0	0	0	0
993604		0	0	0	0	0	0	0	0	0	0	0	0	0	0	0	0	0	0.024	0	0	0	0	0	0	0	0	0	0	0	0	0
3609		0	0	0	0	0	0	0	0	0	0	0	0	0	0	0	0	0	0	0	0	0	0	0	0	0	0	0	0	0	0	0
1090472		0	0	0	0	0	0	0	0.00395257	0	0	0	0	0	0	0	0	0	0	0	0	0	0.00395257	0	0	0	0	0	0	0	0	0
439842		0	0	0	0	0	0	0	0.146947	0	0	1	0	0	0	0	0	0	0	0	0	0	0	0	0	0	0	0	1	0	0	0
1100069		4	1	8.16667	3	72.8333	1	4	0	0	1	0	12	0	0	0	3.33333	43.25	0	0	0	0	2	0	0	30.3333	0	3	0	6.4	2	0
662036		0	0	0	0.0714286	0	0	0	0	0	0	0	0	0	0	0	0	0	0	0	0	0	0	0	0	0	0	0	0	0	0	0
1094248		0	0	0	0	0	0	0	0	0	0	0.004	0	0	0	0	0	0	0	0	0	0.004	0	0	0	0	0	0	0	0	0	0
6225		0	0	0	0	0	0	0	0	0	0.0856031	0	0	0	0	0	0	0	0	0	0	0	0	0	0	0	0	0	0	0	0	0
31212		0	0	0	1	0	0	0	0	6	0	0	0	0	0	0	0	0	3	0	0	0	0	4	0	0	3	0	0	0	0	0
427281		0	0	0	0	0	0	0	0	0	0	0	0	0	0	0	0	0	0.008	0	0	0	0	0	0	0	0	0	0	0	0	0
2768		0	0	0	0	0	0	0	0	0	0	0	0.5	0	0	0	0	1	0	0	0	0	0	0	0	0	0	0	0	0	0	0
46623		0	0	0	0	0	0	0	0	0	0	0	0	0.467511	0	0	0	0	0	0	0	0	0	0	0	0	0	0	0	0.0914691	0	0
9526		19.8786	58.3532	3.04196	66.2336	46.7781	32.7033	57.0861	97.0374	15.5817	32.4413	33.0333	4.85714	0	23.9665	25.2	5.90336	52.25	11.0932	13	19.1872	2.975	42.2821	43.4291	26.3879	3.12581	15.6797	16.7417	77.8333	4.17754	20.3534	1.0099
332317		0	0	0	0	0	0	0	0	0	0	0	0	0	0	0	0	0	0	0	0	0	0.0159841	0	0	0	0	0	0	0	0	0
1102		2	0	0	0.00323625	79.5	0	0	0	0	0	0	1.5	0	0	0	3	0.5	0	0	0	0	0	0	0	5.5	0	0	0	3	0	0
515256		1.66667	0	0.333333	0	1.54167	0	0	0	0	1	0	10.1667	2.5	0	0	0	7.08333	0	0	0	0	0	0	0	1.5	0	0	0	1.5	0	0
188168		0	0	0	4.91525	0	3.9322	6.93529	0	0	4.42373	0	0	0	0	0	0	0	0	0	0	0	0	0	0	0	0	0.491525	0	0	2.86147	0
446468		1.5	0	0	0.333333	24.5718	0	1	0	0	1	2	5.5	1	0	0	0	4.5	0	0	0	0	0	0	0	1.33333	0	0	1.5	2	3	0
509173		0.125	0.129543	13.9167	0	0.505843	0	0	0.0601258	0	0	0.285031	3.38452	0.574463	0	0	0	0.458333	0	0	0	0	0.439823	0	0.0579832	0.57702	0	0	0.0437658	1	0	0
312063		0	0	0	0	0	0	0	1	0	0	0	0	0	0	0	0	0	0	0	0	0	0	0	0	0	0	0	1	0	0	0
1116372		0	0.004	0	0	0	0	0	0.004	0	0	0.008	0	0	0	0	0	0	0	0	0	0	0	0	0	0	0	0	0	0	0	0
799885		0	0	0	0	0	0	0	0	0	0	0	0	0	0	0	0	0	1	0	0	0	0	0	0	0	0	0	0	0	0	0
857890		0	0	0	0	0	0	0	0	0	0	0	0.0227273	0	0	0	0	0	0	0	0	0	0	0	0	0	0	0	0	0	0	0
65495		0	0	0	0.111111	0	0	1	0	4.13934	0	0	0	0	0	0	0	0	5.81398	0	0	0	0	2.08614	0	0	2.12984	0.0128205	0	0	0	1
54981		0	0	0	0	0	0	0	0	0	0.0153846	0	0	0	0	0	0	0	0	0	0	0	0	0	0	0	0	0.0042735	0	0	0.0303309	0
43599		0	0	0	1	0	0	0	0	0	0	0	0	0	0	0	0	0	0	0	0	0	0	0	0	0	0	0	0	0	0	0
85561		0	0	0	0	3.16667	0	0	0	0	0	0	0	0	0	0	0.5	0	0	0	0	0	0	0	0	0	0	0	0	0	0	0
1090389		0	0	0	0	0	0	0	0.00395257	0	0	0	0	0	0	0	0	0	0	0	0	0	0.00395257	0	0	0	0	0	0	0	0	0
18		0.142857	2.14396	6.5	10.5	49.25	5.5	7.33333	6.55714	0	2.5	0	2	2.25	0	0	4	6	0	0	0	0	2.59048	0	0.666667	19.7	0	2.16667	4.94762	45.2	4	0
376		0	0	0	0	1	0	0	0	0	0	0	0	0	0	0	0	0	0	0	0	0	0	0	0	0	0	0	0	0	0	0
264062		0	0	0	0	0	0	0	0	0	0.00389105	0	0	0	0	0	0	0	0	0	0	0	0	0	0	0	0	0	0	0	0	0
283558		0	0	0	0	6	0	0	0	0	0	0	0	0	0	0	0	0	0	0	0	0	0	0	0	0	0	0	0	0	0	0
985081		0	0	0	0	0	0	0	0	0	0	0	0	0	0	0	0	0.0238095	0	0	0	0	0	0	0	0	0	0	0	0.277778	0	0
42906		0	38.25	0	0	0	0	0	36.25	0	0	18	0	0	0	0	0	0	0	0	0	0	3	0	15	0	0	0	11	0	0	0
98825		0	0	0	0	0	0	0	0	0	0	1	0	0	0	0	0	0	0	0	0	0	0	0	14.2	0	0	0	0	0	0	0
156653		0	0	0	0	0	0	0	0	0	0	0	0	0	0	0	0	0.5	0	0	0	0	0	0	0	0	0	0	0	0	0	0
1115984		0	0.008	0	0	0	0	0	0.008	0	0	0.008	0	0	0	0	0	0	0	0	0	0	0.00790625	0	0.00390625	0	0	0	0	0	0	0
669461		0	0	0	0	0	0	0	0.00371747	0	0	0	0	0	0	0	0	0	0	0	0	0	0.00371747	0	0	0	0	0	0	0	0	0
138740		0	0	0	0	0.333333	0	0	0	0	0	0	0	0	0	0	0	0	0	0	0	0	0	0	0	0	0	0	0	0	0	0
37861		0	0	0	3	0	0	0	0	0	0	0	0	0	0	0	0	0	0	0	0	0	0	0	0	0	0	1.00855	0	0	0	0
266117		0	0	2	8.5	18.6667	2.25	5.5	0	0	2	1.33333	1.5	2	0	0	0	4	0	0	0	0	0	0	0	3	0	0	0	1.5	1	0
542357		0	0	0	0	0	0	0	0	0	0	0	0.5	0	0	0	0	0	0	0	0	0	0	0	0	0	0	0	0	0	0	0
317906		0	0	0	0	0	0	0	0	0	0	0	0	0	0	0	0	0	0	0	0	0	0	0	0	0	0.213514	0	0	0	0	0
110456		0	0	0	0	0	0	0	0	0	0	1	1	0	0	0	0	0	0	0	0	0	0	0	0	0	0	0	0	0	0	0
1087263		0	0	0	0	0	0	0	0.004	0	0	0	0	0	0	0	0	0	0	0	0	0	0	0	0	0	0	0	0	0	0	0
84337		1	0.0274254	0	1	0	0	0	0.0128205	0	0	0	0	0	0	0	0	2	0	0	0	0	0.0149254	0	0	0	0	0	0.0147059	0	0	0
8383		0	0	0	0	0	0	1	0	0	0	0	0	0	0	0	0	0	0	0	0	0	0	0.5	0	0	0	0	0	0	0	0
81539		0.0434783	0	0	0	0	0	0	0	0	0	0	0	0	0	0	0	0	0	0	0	0	0	0	0	0	0	0	0	0	0	0
483915		0	0	0	0	0	0	0	0	0	0	0	0	0	0	0	0	0	0	0	0	0	0	0	0.004	0	0	0	0	0	0	0
257388		2	0	0	0	0	0	0	0	0	0	0	16.1667	2	0	0	0	5.004	0	0	0	0	0	0	0	0	0	0	0	0	0	0
196119		1	0	0	0	0.111111	0	0	0	0	0	0	8	2.33333	0	0	0	0	0	0	0	0	0	0	0	0	0	1	0	0	0	0
1115974		0	0.008	0	0	0	0	0	0.008	0	0	0.008	0	0	0	0	0	0	0	0	0	0	0.00790625	0	0.00390625	0	0	0	0	0	0	0
6659		0	0	0	0	0	0	0	0	24.6243	2	0	0	0	2.38754	0	0	0	0.343234	0	5.34212	0	0	26.7833	0	0	3.58186	0.5	0	0	0	1.0099
652440		0	0	0	0	0	0	0	0	0	0	0	0	0	0	0	0	0.004	0	0	0	0	0	0	0	0	0	0	0	0	0	0
157		3	10	1	11.0065	19	0	2	3	0	0	0	6	1	0	0	1	2.5	0	0	0	0	0.5	0	0	5	0	5	1	15	5	0
948525		0	0	0	0	0.004	0	0	0	0	0	0	0	0	0	0	0	0	0	0	0	0	0	0	0	0	0	0	0	0	0	0
747365		1	0	0	0	1	0	0	0	0	0	1	1.83333	1	0	0	0	3.25	0	0	0	0	0	0	0	1	0	0	0	0	2	0
37989		0	0	0	0	0	0	0	0	0	0	0	0	0	0	0	0	0	0	0	0	0	0.00398406	0	0	0	0	0	0	0	0	0
33975		0	0	0	0	0	0	0	0	0	0	0	0	0	0	0	0	0	0	0	0	0	0	0	0.00675676	0	0	0	0.01	0	0	0
47877		0	0	0	0	0.333333	0	0	0	0	0	0	0	0	0	0	0.333333	0	0	0	0	0	0	0	0	0	0	0	0	0.2	0	0
683737		0	0	0	0	0	0	0	0.00371747	0	0	0	0	0	0	0	0	0	0	0	0	0	0.00371747	0	0.004	0	0	0	0	0	0	0
166032		0	0	0	0	0	0	0	0	0	0	0	0	0	0	0	0	0	0.024	0	0	0	0	0	0	0	0	0	0	0	0	0
1213		0	0	0	0	0	0	2	0	0	0	0	0	0	0	0	0	0	0	0	0	0	0	0	0	0	0	0	0	0	0	0
1043211		0	0	0	0	0.004	0	0	0	0	0	0.004	0	0	0	0	0	0	0	0	0	0.004	0	0	0	0	0	0	0	0	0	0
198252		1758.71	0	2	17	68.8333	10	37.2	0	0	74.6429	0	8951.68	1502.93	0	0	5	2325.94	0	0	0	0	0	0	0	1.33333	0	21	0	0	57	0
414005		0	0	0	0	0.5	0	0	0	0.5	0	0	0	0	0	0	0	0	0	0	0	0	0	0	0	0	0	0	0	0	0	0
80811		6	1	9	5.16667	179.067	9.5	22.1667	0	0	8.7	1	5.76667	3.5	0	0	8.83333	54.7667	0	0	0	0	2	0	0	17	0	13	2.66667	14.6667	4	0
6209		0	0	0	0	0	0	0	0	0.75	0	0	0	0	0	0	0	0	0	0	0	0	0	0	0	0	0	0	0	0	0	0
216366		0	0	0	0	0	0	0	0	5.09412	0.0153846	0	0	0	1.0542	0	0	0	1.01495	0	3.0271	0	0	19.6954	0	0	1.08857	0.0042735	0	0	0.0303309	0.00990099
435192		0	0	0	0	0	0	0	0	0	0	0	0	0	0	0	0	0	0	0	0	0	0	0	0.004	0	0	0	0	0	0	0
868998		0	0	0	0	0	0	0	0	0	0	0	0	0	0	0	0	0.004	0	0	0	0	0	0	0	0	0	0	0	0	0	0
8421		0	0	0	0	0	0	0	0	0	0	0	0	0	0	0	0	0	0	0	0	0	1	0	0.170715	0	0	0	0	0	0	0
6080		5	0	8	11	9.83333	11	14.8333	0.5	20.8333	12.8528	0	14.5	3	0	0	0	5	3.83333	0	1	0	0	13.5	0.25	1.5	14.4881	11	0	3.5	14	2
100002		0	0.025683	0	0	0	0	0	0.0447628	0	0	0.00724638	0	0	0	0	0	0	0	0	0	0	0.0111817	0	0.0223395	0	0	0	0.0197541	0	0	0
52798		0	0	0	0	0	0	0	0	0	0	0	0	0	0	0	0	0	0	0	0	0	0	0	0	0	0.0135135	2.25	0	0	0	0
55079		0	0	0	0	1	0	0	0	0	0	0	0	0	0	0	0	1	0	0	0	0	0	0	0	0	0	0	0	0	0	0
352452		0	0	0	0	0	0	0	0	0.0104167	0	0	0	0	0	0	0	0	0.0348822	0	0	0	0	0	0	0	0.0208063	0	0	0	0	0
238743		0	0	0	0	0	0	0	0	0	0	0	0	0	0	0	0	0	0	0	0	0	0	0	1	0	0	0	0	0	0	0
44335		0	0	0	0	0	0	0	0	0	0	0	1	0	0	0	0	0	0	0	0	0	0	0	0	0	0	0	0	0	0	0
328605		0	0	0	0	0	0	0	0	0	0	0	0	0	0	0	0	0	0	0	0	0	0	0	0	0	0.0135135	0	0	0	0	0
76747		0	0	0	0	0	0	0	0	0	0	0	0	0	0	0	0	0	0	0	0	0	0	0	0	0	0	0.6	0	0	0	0
33386		0	9	0	5.5	3	2.5	6.14286	0	10	9.9	3	1	0	0	0	0	1.5	2.83333	0	2	0	0	7.66667	0.333333	0	11.9167	3.17391	4	0	5	2
76633		0	1	0.0909091	0	0	0	0	0	0	0	0	0	0	0	0	0	0	0	0	0	0	0	0	0	0	0	0	0	0	0	0
3323		0	0	0	0	0	0	0	0	0	0	0	0	0	0	0	0	0	0	0	0	0	0	0	0	0	0	0	0	0	0.030303	0
209260		0	0	0	0.00323625	0	0	0	0	0	0	0	0	0	0	0	0	0	0	0	0	0	0	0	0	0	0	0	0	0	0	0
1129369		0.333333	0	0.5	0	0.583333	0	0	0	0	0	0	0.333333	0	0	0	0.2	0	0	0	0	0	0	0	0	0	0	0	0	0	0	0
1034721		0	0	0	0	0	0	0	0	0.25	0	0	0	0	0	0	0	0	0	0	0	0	0	0	0	0	0	0	0	0	0	0
541229		0.333333	0.928171	0.05	0	0.833333	0	0	7.66209	0	0	1.96368	1.29348	0	0	0	0	3	0	0	0	0	2.22222	0	0.5	0.2	0	0	0.842857	1.01087	0	0
5141		0	0	0	1.71429	0	0	3	4.5	0	0	0	0	0	0	0	0	0	0	0	0	0	27.7348	0	0	2	0	4	1	0	0	0
952		1.5	0	0	0.012945	17	0	0	0	0	1	0	20.3333	4.33333	0	0	0	10.5	0	0	0	0	0	0	0	1	0	0	0	1	0	0
6758		0	0	0	0	0	0	0	0	0	1	0	0	0	0	0	0	0	0	0	0	0	0	0	0	0	0	0	0	0	0	0
4498		0	0	0	0	0.553571	0	0	0	0	0	0	0	0	0	0	0	0	0	0	0	0	0	0	0	0	0	0	0	0	0	0
932089		0	0	0	0	0	0	0	0	0	0	0	0	0	0	0	0	0	0.024	0	0	0	0	0	0	0	0	0	0	0	0	0
554131		0	0	0	0	0	0	0	0	0	0	0	0	0	0	0	0	0	0	0	0	0	0.142857	0	0	0	0	0	0	0	0	0
87757		0	0	0	0	0	0	0	0	0	0	0.047619	0	0	0	0	0	0	0	0	0	0	0	0	0.0986291	0	0	0	0	0	0	0
863956		0	0	0	0	0	0	0	0	0	0.00389105	0	0	0	0	0	0	0	0	0	0	0	0	0	0	0	0	0	0	0	0	0
927211		0	0	0	0	0	0	0	0	0	0	0	0	0	0	0	0	0	0	0	0	0	0.004	0	0	0	0	0	0	0	0	0
66447		0	0	0	0	0	0	0	0	0	0	0	0	0	0	0	0	0	0	0	0	0	0	0	0.00571429	0	0	0	0	0	0	0
191675		9.14286	1.05292	2	2.01375	10.7381	0	5	0.204538	0	4	1.5	24.7	5.5	0	0	3	10.5	0	0	0	0	1.60543	0	1.1716	1	0	2	1.51621	2.26667	1	0
383407		0.25	2.06275	3	7.48615	16.9631	0.333333	4.96667	0.833333	0	2.43333	1.75	2.1	1	0	0	0	0.142857	0	0	0	0	2.41429	0	0.25	3.55	0	3.9	1.45952	1.25	3.16667	0
29575		1	0.0201681	0	0	0	0	0	0.02048	0	0	0	21.8333	0	0	0	0	8.5	0	0	0	0	0.0204119	0	0.0103093	1.5	0	0	0.0378613	1.5	0	0
89902		0	0	0	0	0	0	0	0	0	0	0	0	0	0	0	0	0	0.5	0	0	0	0	0	0	0	0	0	0	0	0	0
211390		0	0	0	0.125	0	0	0.166667	0	0	0.166667	0	0	0	0	0	0	0	0	0	0	0	0	0	0	0	0	0	0	0	0	0
544718		0	0	0	0.00647249	0	0	0	0	0	0	0	0	0	0	0	0	0	0	0	0	0	0	0	0	0	0	0	0	8.06667	0	0
1129024		0	0	0	0	0	0	0	0.00395257	0	0	0	0	0	0	0	0	0	0	0	0	0	0.00395257	0	0	0	0	0	0	0	0	0
283985		0	0	0	0	0	0	0	0	0	0	0	0	0	0	0	0	0	0	0	0	0	0	0	0	0	0	0	0	0	0	0
411153		19.8667	0	186.5	0	18	0	0	0	0	0.5	0	228.233	28.75	0	0	0	54.1667	0	0	0	0	0	0	0	27.5	0	1	0	32.6667	0	0
409367		0	0	0	0	0	0	0	0	0	0.00389105	0	0	0	0	0	0	0	0.00505051	0	0	0	0	0	0	0	0	0.125	0	0	0	0
515198		0	0.278351	0	0	0	0	0	0.24824	0	0	0.0425292	0	0	0	0	0	0	0	0	0	0	0.0872459	0	0.0520767	0	0	0	0.0993134	0	0	0
31847		0	0	0	0	0	0	0	0.00840336	0	0	0	0	0	0	0	0	0	0	0	0	0	0	0	0	0	0	0	0	0	0	0
252739		0	0.000884956	0	0	0	0	0	0	0	0	0	0	0	0	0	0	0	0	0	0	0	0	0	0	0	0	0	0	0	0	0
710834		0	0	0	0	0.5	0	0	0	0	0	0	0	0	0	0	0	0	0	0	0	0	0	0	0	0	0	0	0	0	0	0
708588		0	0	0	0	0	0	0	0	0	0	0	0.25	0	0	0	0	0	0	0	0	0	0	0	0	0	0	0	0	0	0	0
5949		0	0	0	0	0	0	0	0	1	0	0	0	0	0	0	0	0	0	0	0	0	0	0	0	0	0	0	0	0	0	0
30496		0	0	0	0	0	0	0	0	0	0	0	0	0	0	0	0	0	0	0	0	0	0	0	0.00555556	0	0	0	0	0	0	0
37528		0	0	0	2	0	1	1.5	0	0	0	0	0	0	0	0	0	0	0	0	0	0	0	0	0	0	0	1	0	0	0.5	0
714599		0	0	0	0	0	0	0	0	0	0	0	0	0	0	0	0	0	0.024	0	0	0	0	0	0	0	0	0	0	0	0	0
80864		16	470.836	83.1667	163.322	944.767	38	127.352	470.555	0	51.8	453.663	64.4833	5.16667	0	0	42.2833	46.9978	0	0	0	0	272.974	0	195.903	134.053	0	50.0262	350.241	89.7222	57.9833	0
107920		0	0	0	0	0	0	0	0	0	0	0	1	0	0	0	0	0	0	0	0	0	0	0	0	0	0	0	0	0	0	0
753618		0	0	0	0	0	0	0	0	0	0.5	0	0	0	0	0	0	0	0	0	0	0	0	0	0	0	0	0	0	0	0	0
100272		1	0	0	0.392857	0	0.0196078	0	0	0.442486	2.01818	0	0	0	0	0	0	1.40986	3.15518	0	0.362745	0	1.01198	0.109359	0.00404858	0	0.739507	2.04348	0	0	0	0
1105171		0	0	0	0	0	0	0	0	0	0	0	0	1	0	0	0	0	0	0	0	0	0	0	0	0	0	0	0	0	0	0
640510		0.1	8.23842	5	17.1667	31.3667	3	11	10.6864	0	3.5	6.71667	4	0	0	0	2.5	1	0	0	0	0	3.56117	0	4.01718	7.33333	0	5	4.96126	3.25	10	0
542446		0	0	5	0	1	0	0	0	0	0	0	0	0	0	0	0	0	0	0	0	0	0	0	0	1	0	0	0	0	0	0
1051836		0	0	0	0	0	0	0	0	0	0	0.004	0	0	0	0	0	0	0	0	0	0.004	0	0	0	0	0	0	0	0	0	0
41710		0	0	0	0	0	0	0	0	0	0	0	0	0	0	0	0	0	0	0	0	0	0	0	0.00555556	0	0	0	0	0	0	0
459968		0	0	0	0	0	0	0.0666667	0	0	0.0714286	0	0	0	0	0	0	0	0	0	0	0	0	0	0	0	0	0	0	0	0	0
204042		0	7.22982	0.54	5.82374	23.6667	0	3.5	12.3275	0	1.5	6.58333	2.5	0	0	0	0.166667	1	0	0	0	0	3.5076	0	3.67358	2	0	0	13.7926	11.3333	1.575	0
24942		0	0	0	0	0	0	0	0	0	0	0	0	0	0	0	0	0	0	0	0	0	0	0	0	0	0	0	0	0	0	0
110618		1	3	0	2.5	3	2.33333	6	53.1667	0	1	1	0	0	0	0	0	1.5	0	0	0	0	322.874	0	0	0	0	1	5.5	0	2	0
445870		0	0	0	0	0	0	0	0	0	0	0	0	0	0	0	0	0.004	0	0	0	0	0	0	0	0	0	0	0	0	0	0
937653		0	0.00795257	0	0	0	0	0	0.0159051	0	0	0.00790514	0	0	0	0	0	0	0	0	0	0	0.019764	0	0	0	0	0	0.0118588	0	0	0
336170		0	0.272392	0	0	0	0	0	0.253643	0	0	0.0352828	0	0	0	0	0	0	0	0	0	0	0.101825	0	0.0249525	0	0	0	0.115084	0	0	0
117558		0	0	0	0	1	0	0	0	7.26471	0	0	0	0	0	0	0	0	11.102	0	3.05882	0	0	2.06322	0	0	9.44266	0	0	0	0	2
58226		0	0	0	0	1	0	0	0	0	0	0	0.166667	0	0	0	0	0	0	0	0	0	0.25	0	0	0	0	0	0	0	0	0
258		1	0	0	0	0	0	0	0	0	0	0	0	0	0	0	0	0	0	0	0	0	0	0	0	0	0	0	0	0	0	0
297243		0	0	0	0	0	0	0	0	0	0	0	0	0	0	0	0	0	0	0	0	0	0	0	0	0	0	0	0	1	0	0
1107343		0	0	0	0	0	0	0	0	0	0	0	0	0	0	0	0	0	0	0	0	0.004	0	0	0	0	0	0	0	0	0	0
212790		6	0	1	0	14.6667	0	0	1	0	1	0	15.5	4.04762	0	0	0	6.5	0	0	0	0	0	0	0	1	0	0	0	9.25	0	0
81466		1	0	0	0	3.05263	0	0	0	0	0	0	0	0	0	0	0	1	0	0	0	0	0	0	0	0	0	0	0	1	0	0
32261		0	0	0	0	0	2	0	0	0	0	0	1	0	0	0	0	0	0	0	0	0	0	0	0	0	0	0.0042735	0	0	1	0
196809		0	0	0.062037	0	0	0	0	0	0	0	0	0	0	0	0	0	0	0	0	0	0	0	0	0	0	0	0	0	0	0	0
232262		0	0	0	0	0	0	0	0	0	1	0	0	0	0	0	0	0	0	0	0	0	0	0	0	0	0	0	0	0	0	0
49351		0	0	0	0	0	0	0	0	0	0	0	0	0	0	0	0	0	0	0	0	0	0	0	0	0	0	0.0042735	0	0	0	0
289376		0	0	1	0	9.5	0	0	0	0	0	0	15.5	0	0	0	0.5	4	0	0	0	0	0	0	0	1	0	0	0	4.33333	0	0
412963		1	1.36645	3	12	28.5	1.83333	5.7	0.914835	0	6.33333	0.3	2.33333	0	0	0	1	2	0	0	0	0	0.371949	0	2.16595	2.83333	0	3.16667	1.85261	2	4	0
592022		0.5	5.00973	0	0	2.08333	0	0	10.75	0	0	3.16667	3.5	0	0	0	0	1.33333	0	0	0	0	6.7	0	1.5	0.833333	0	0	4.66667	0	0	0
214729		0	0	0	0	0	0	0	0	0	0	0	0	0	0	0	0	0	0	0	0	0	0	0	0	0	0	0	0.00657895	0	0	0
498404		0	0	0	0	0	0	0	0	0	0	0	0	0.483554	0	0	0	0	0	0	0	0	0	0	0	0	0	0	0	0	0	0
308613		0	0	0	0.571429	0	0	4	0	0	1.125	0	0	0	0	0	0	0	0	0	0	0	0	0	0	0	0	1	0	0	0	0
33424		0	0	0	1	0	0	1	0	0	0	0	0	0	0	0	0	0.0909091	0	0	0	0	0	0	0	0	0	1	0	0	0	0
983545		6	0	5.5	2	74.2619	1.58333	1.58333	0	0	1.75	0	29.2619	2	0	0	1.5	3.575	0	0	0	0	0	0	0	7	0	1	1	15.75	1.25	0
41875		0	0	0	0	0.0526316	0	1	0	0	0	0	0	0	0	0	0	0	0	0	0	0	0	0	0	0	0	0	0	0	0	0
265456		0	0	0	0	0	0	0	0	0	3	0	0	0	0	0	0	0	0	0	0	0	0	0	0	0	0	0	0	0	0	0
491042		0	0	0	0	0.004	0	0	0	0	0	0	0	0	0	0	0	0	0	0	0	0	0	0	0	0	0	0	0	0	0	0
714616		0	0	0	0	0	0	0	0	0	0	0	0	0	0	0	0	0	0.024	0	0	0	0	0	0	0	0	0	0	0	0	0
65702		0	0	0	0	0	0	1	0	0	0	0	0	0	0	0	0	1	0	0	0	0	1	0	0	0	0	0	0	0	0.333333	0
928888		0	0	0	0	0	0	0	0.004	0	0	0	0	0	0	0	0	0	0	0	0	0	0	0	0	0	0	0	0	0	0	0
3590		0	0	0	0	0	0	0	0	0	0	0	0	0	0	0	0	0	0	0	0	0	0	0	0	0	0	0	0	0	0	0
1060		15.75	5	217.667	34.58	765.355	16.5	24.1667	7	0	10.1667	1	135.546	10.5833	0	0	44.1429	29.6667	0	0	0	0	0.5	0	4.5	838.083	0	10	1.58333	86.7167	13.95	0
1033978		1	0.5	0	0	1	0	0	10.75	0	0	0	0	0	0	0	0	0.5	0	0	0	0	72.0199	0	0	1.5	0	0	1	0	0	0
2104		0	0	0	0	0.75	0	0	0	0	0	1.8	0	0	0	0	0	0	0	5.4	0	1.8	0.6	0	0	0	0	0	0	0	0	0
941636		0	0	0	0	0	0	0	0	0.0224747	0	0	0	0	0	0	0	0	0.0263158	0	0	0	0	0.0471184	0	0	0.0113636	0	0	0	0	0
1071744		0	0	0	0	0	0	0	0	0	0.00389105	0	0	0	0	0	0	0	0	0	0	0	0	0	0	0	0	0	0	0	0	0
455611		0	0	0	0	1	0	0	0	0	0	0	3.33333	0	0	0	0	0	0	0	0	0	0	0	0	0	0	0	0	0	0	0
445877		0	0	0	0	0	0	0	0	0	0	0	0	0	0	0	0	0.004	0	0	0	0	0	0	0	0	0	0	0	0	0	0
225937		18.75	1	17	9	195.917	1	3.63333	0	0	4.5	1	19.05	2.5	0	0	11.5	12.5	0	0	0	0	3	0	0	75.5	0	2	0	401.5	3	0
972		7	0.00707965	4	0.02589	12.6667	1	2	0.5	0	1	0.5	61.1	6	0	0	1	20.5833	0	0	0	0	1	0	0	4.1	0	0	0	10.3958	0	0
470631		0	0	0	0	0	0	0	0	0	0	0	0	0	0	0	0	0	0	0	0	0	0.0117647	0	0	0	0	0	0	0	0	0
7787		0	0	0	0	0	0	1	0	0	0	0	0	0	0	0	0	0	0	0	0	0	0	0	0	0	0	0	0	0	0	0
65596		0	0	0	0	0	0	0	0	0	0	0	0	0	0	0	0	4	0	0	0	0	0	0	0	0	0	0	0	0	0	0
1073861		0	0	0	0	0	0	0	0.00371747	0	0	0	0	0	0	0	0	0	0	0	0	0	0.00371747	0	0	0	0	0	0	0	0	0
1055407		0	0	0	0	0.004	0	0	0	0	0	0.004	0	0	0	0	0	0	0	0	0	0	0	0	0	0	0	0	0	0	0	0
668336		0	0	0.5	4	11	2.5	7.33333	0.508677	0	3	0.5	2.36782	0	0	0	0.0526316	1	0	0	0	0	1.00434	0	0.00493583	0	0	0.333333	0.00974965	3.5	2.5	0
573569		4.9	0	1	0.5	5.5	0.5	1	0	0	0.5	0	13.4531	0	0	0	0	13.9444	0	0	0	0	0	0	0	1.5	0	0	0	2.33333	0	0
69681		0	0	0	0	0	0	0	0	0	0	0	0	0	0	0	0	0	0.00505051	0	0	0	0	0	0	0	0.024	0	0	0	0	0
128464		0	0	0	0	1	0	0	0	0	0	0	0	0	0	0	0	0	0	0	0	0	0	0	0	0	0	0	0	0	0	0
5130		0	0	0	0	0	0	0	0	0	0	0	0	0	0	0	0	0	0	0	0	0	1	0	0	0	0	0	0	0	0	0
171414		0	0	0	0	1	0.333333	0	0	0	1.86667	1.1875	0	0	0	0	0	0	0	0	0	0	0	0	15.0114	0	0	0.333333	0	0	0	0
5684		0	0	0	0.0075188	0	0	0	0	0	0	0	0	0	0	0	0	0	0	0	0	0	0	0	0	0	0	0	0	0	0	0
6243		1.95238	1.00265	4	19.3333	3.75	4.16667	21.2725	10.5667	11.5	16.2931	9	6.78571	1	0	0	0.891304	5.66667	5	0	0	0	7	1	1	1	7.08333	11.5107	0.00239234	2.5	6.83333	0
1116368		0	0	0	0	0	0	0	0	0	0	0.004	0	0	0	0	0	0	0	0	0	0.004	0	0	0	0	0	0	0	0	0	0
1118959		0	0.00442478	0	0	0.0741758	0	0	0.375	0	0	0	1.16804	0	0	0	0	0.0344828	0	0	0	0	0	0	0	0.0555556	0	0	0	0.0357143	0	0
86203		0	0	0	0	0	0	0	0	0	0	0	0	0	0	0	0	0	0	0	0	0	0	0	0.00976287	0	0	0	0	0	0	0
97084		4	0	1	0	7.5	0	1	0	0	1	0	20.4333	2	0	0	1	12	0	0	0	0	0	0	0	1	0	0	0	11.5	0	0
81684		0	0	0.0384615	0	0	0	0	0	0	0	0	0	0	0	0	0	0	0	0	0	0	0	0	0	0	0	0	0	0	0	0
38605		0	0	1	23.6667	4.25	11.6583	36	0	10.1742	31.7293	0	2.33333	1	0	0	1	1	10	0	0	0	0	5.2	3.5	0	10.5769	12	0	0	12.125	1
2830		25	0	0	3.85714	0	0	1	1	7.91026	0	0	1.5	0	0	0	0	14.8604	2.16667	0	0	0	0	3.33333	0	0	0.5	0	0	0.333333	0	0
568817		1	0	0	0	2	0	1	0.00300201	0	0	0	4.5	0	0	0	2	0	0	0	0	0	0	0	0	0	0	0.166667	0	0	0.333333	0
497965		3	0	0	2	7.5	1	3.5	0	0	0	0	4	1	0	0	0	7	0	0	0	0	0	0	0	2	0	0	0	0	0	0
66219		0	0.00707965	1	0	1	0	0	2	0	0	0	9	0	0	0	0	4	0	0	0	0	0.5	0	0	0	0	0	0	1	0	0
35676		1	0	0	0	0	0	0	0	0	0	0	0	0	0	0	0	1	0	0	0	0	0	0	0	0	0	0	0	0	0	0
332272		5	0	0	0	0	0	0	0	0	0	0	13	3	0	0	0	5	0	0	0	0	0	0	0	0	0	0	0	0	0	0
670885		0	0	0	0	0	0	0	0	0	0	0	0.004	0.004	0	0	0	0	0	0	0	0	0	0	0	0	0	0	0	0	0	0
2969		0	0	0	0	0	0	0	0	3	0	0	0	0	0	0	0	0	0	0	0	0	0	0	0	0	0	0	0	0	0	0
84378		2	0	0	0	2	0	0	0	0	0	0	4.5	1	0	0	0	1	0	1	0	0	0	0	0	2.25	0	0	0	3.25	0	0
7898		24.7238	1	7	248.775	65.0333	100.754	281.859	57.6667	1088.42	226.44	3757.62	10	0	5358.08	8142.95	37.1324	24.4351	1826.86	2	11331.6	15	519.196	8071.6	5820.13	4.5	1059.82	121.753	1	4.33333	117.833	5.1839
202595		0	0	0	0	0	0	0	0	0	0.333333	0	0	0	0	0	0	0	0	0	0	0	0	0	0	0	0	0	0	0	0	0
466008		0	0	0	0	0	0	0	0	0	0	0	0.0049505	0	0	0	0	0	0	0	0	0	0	0	0	0	0	0	0	0	0	0
561304		0	0	0	0.1	0.583333	0	0.1	0	0	0	0	1	0	0	0	0.666667	0.0243902	0	0	0	0	0	0	0	0	0	0.1	0	0	0	0
560721		0	0	0	0	1	0	0	0	0	0	0	0	0	0	0	0	0	0	0	0	0	0	0	0	0	0	0	0	0	0	0
559292		0	0	0	0.4	0	0	0.4	0	0.25	0.257782	0	0	0	0	0	0	0.5	0	0	0	0	0	0	0	0	0	0.333333	0	0	0	0
182082		0	0	0	0	0	0	0	0	0	0	0	0.2	0	0	0	0	0.225641	0	0	0	0	0	0	0	0	0	0	0	0.166667	0	0
5148		1.125	0.366667	11	4.85714	35.3333	0	4.66667	9.83333	0	4	1	2	0	0	0	0	0	0	0	0	0	102.568	0	0	10.25	0	5.5	1	1	2	0
222809		0	0	0	0	1	0	0	0	0	0	0	0	0	0	0	0	0	0	0	0	0	0	0	0	0	0	0	0	0	0	0
568814		0.0714286	0	0.111111	0	0	0	0	0	0	0	0	0.196429	0	0	0	0	0.190909	0	0	0	0	0	0	0	0	0	0	0	0	0	0
394684		0	0	0	0	0	0.0434783	0	0	0	0.518182	0	0	0	0	0	0	0	0	0	0	0	0	0	0	0	0	0	0	0	0.0434783	0
129831		0	0	0	0	0	0	0	0	0	0.0192757	0	0	0	0	0	0	0	0.00505051	0	0	0	0	0	0	0	0	0.0042735	0	0	0.0303309	0
51511		0	0	0	0	0	0	0	0	0	1	0	0	0	0	0	0	0	0	0	1	0	0	0	0	0	0	0	0	0	0	0
3065		3	0	0	3	5	0	0	0	0	1	0	2.33333	0.666667	0	0	1	1.55405	0	0	0	0	0	0	0	0	0	1	0	0	3	0
199682		0	0.349333	0	0	0	0	0	0	0	0	0	0	0	0	0	0	0	0	0	0	0	0.032	0	0	0	0	0	0.016	0	0	0
66162		0	0	0	0	0	0	0	0	0	0	0	0	0	0	0	0	0	0	0	0	0	0	0	0	0	0	0	0.00657895	0	0	0
864958		0	0	0	0	0	0	0	0.004	0	0	0	0	0	0	0	0	0	0	0	0	0	0	0	0	0	0	0	0	0	0	0
223555		0	0	0	0	1	0	0	0	0	0	0	0	0	0	0	0	0	0	0	0	0	0	0	0	0	0	0	0	0	0	0
235681		0	0	4	0	1	0	0	0	0	0	0	0	0	0	0	0	0	0	0	0	0	0	0	0	1	0	0	0	0	0	0
320122		0	0	0	0	0	0	0	0	0	0	0	0.5	0	0	0	0	0	0	0	0	0	0	0	0	0	0	0	0	0	0	0
34519		0	0	0	0	0	0	0	0	0.127859	0.00389105	0	0	0	0	0	0	0	0.803719	0	0	0	0	0.0526797	0	0	0.23311	0	0	0	0	0
237082		0.130435	0	0	0	0	0	0	0	0	0	0	0	0	0	0	0	0	0	0	0	0	0	0	0	0	0	0	0	0	0	0
10743		0	0	0	0	0	0	0	0.0608974	0	0	0	0	0	0	0	0	0	0	0	0	0	0	0	0	0	0	0	0	0	0	0
656917		0	0	0	0	0	0	0	0	0	0	0	0	0	0	0	0	0	0	0	0	0	1	0	0	0	0	0	0	0	0	0
163113		0	0	0	0	0	0	0	0	0	0	0.110119	0	0	0	0	0	0	0	0	0	0	0	0	0.0986291	0	0	0	0	0	0	0
14		5	0	1	0	1.86364	0	0	0	0	0	0	17.9167	0.666667	0	0	0	7	0	0	0	0	0	0	0	1	0	0	0	2.25	0	0
264049		0	0	0	0	0	0	0	0	0	0.00389105	0	0	0	0	0	0	0	0	0	0	0	0	0	0	0	0	0	0	0	0	0
864013		0	0	0	0	0	0	0	0	0	0.00389105	0	0	0	0	0	0	0	0.00505051	0	0	0	0	0	0	0	0	0	0	0	0	0
455595		0	0	0	0	0	0	0	0	0	0	0	2	0	0	0	0	0	0	0	0	0	0	0	0	0	0	0	0	0	0	0
186818		2	11.0106	0	0	0	0	0	52.5	0	0	4	7.5	0.333333	0	0	0	2	0	0	0	0	9.5	0	0	0	0	0	3.06667	9.25	0	0
292629		0	0	1	0.00647249	6	0	1	2	0	0	0	2	0	0	0	0	3.5	0	0	0	0	0	0	0	4	0	0	3	7	1	0
412833		0	0	0	0	0	0	0	0	0	0.0181818	0	0	0	0	0	0	0	0	0	0	0	0	0	0	0	0	0	0	0	0	0
765962		0	0	0	0	0	0	0	0	0	0	0	0.2	0	0	0	0	0.0238095	0	0	0	0	0	0	0	0	0	0	0.5	0.0902778	0	0
113604		0	0	1	0.0944444	1	1	0.0540541	0	0	2.00389	0	16.6667	0	0	0	0	0	0	0	0	0	0	0	0	0	0	0.5	0	0	0	0
46534		0	0	0	0	0	0	0	0.00840336	0	0	0	0	0	0	0	0	0	0	0	0	0	0	0	0	0	0	0	0	0	0	0
585413		0	0	0	0	0	0	0.2	0	0	0	0	0	0	0	0	0	0.0788015	0	0	0	0	0	0	0	0	0	0	0	0	0	0
102665		0	0	0	0	0	0	0	0	0.0584812	0	0	0	0	0	0	0	0	0.0588235	0	0	0	0	0.0266127	0	0	0	0	0	0	0	0
469817		0	0	0	0	0	0	0	0	0	0	0	0	0	0	0	0	0	0	0	0	0	0.030303	0	0	0	0	0	0	0	0	0
234		1.71818	0.811594	23.564	17.4945	476.166	2	10.8028	0	0	4.86364	0.818182	9.80451	3	0	0	29.8807	6.94737	0	0	0	0	0	0	0	50.3985	0	2	0	28.4751	2.875	0
743561		0	0	0	0	0	1	0	0	0	0	0	0	0	0	0	0	6	0	0	0	0	0	0	0	0	0	0	0	0	0	0
651585		0	0	0	0	0	0	0	2	0	0	0	0	0	0	0	0	0	0	0	0	0	0	0	0	0	0	0	0	0	0	0
4580		0	0	0	0	0	0	0	0	0	0	0.382279	0	0	0	0	0	0	0	0	0	0	0	0	0.00909091	0	0	0	0	0	0	0
591003		0	0	0	0	0	0	0	0	0	0	0	0	0	0	0	0	0	0	0	0	0	0.030303	0	0	0	0	0	0	0	0	0
180281		0	0.000884956	0	0	0	0	0	0	0	0	0	0	0	0	0	0	0	0	0	0	0	0	0	0	0	0	0	0	0	0	0
120567		0	0	0	0	0	0	0	0	0	0	0	0	0	0	0	0	0	0	0	0	0	0	0	0	0	0.0135135	2.25	0	0	0	0
638303		0	0	0	0	0	0	0	0	0	0	0	0	0	0	0	0	0.333333	0	0	0	0	0	0	0	0	0	0	0	0	1	0
3554		0	0	0	0	0	0	1	0	0	0	0	0	0	0	0	0	0	0	0	0	0	0	0	0	0	0	0	0	0	0	0
155977		3	1	0	0	11.2	0	4	7.33333	0	0	0	1	0	0	0	1	5.52703	0	0	0	0	0	0	2	2.25	0	0	1	2.25	0	0
1005807		0	0	0	0	0	0	0	0.004	0	0	0	0	0	0	0	0	0	0	0	0	0	0	0	0	0	0	0	0	0	0	0
887371		0	0	0.0270468	0	0	0	0	0	0	0	0	0	0	0	0	0	0	0	0	0	0	0	0	0	0	0	0	0	0	0	0
565050		1.92424	0	15.4167	3.83333	58.2833	0.583333	4	0	0	0.2	1	0	0.333333	0	0	1.66667	4.16667	0	0	0	0	0.333333	0	0.333333	16.8333	0	0.7	0.5	7.5	1.29167	0
71673		0	0	0	0	0	0	0	0	0	0	0	0	0	0	0	0	0	0	0	0	0	0	0	0.00555556	0	0	0	0	0	0	0
6936		0	0	0	0	0	1	0	0	5.54112	0	0	0	0	0.825415	0	0	0	1.25839	0	2.39074	0	0	13.0501	0	0	5.93907	0	0	0	0.5	1.10081
666509		0	0	0	0	0	0	0	0	0	0	0	0.008	0.008	0	0	0	0	0	0	0	0	0	0	0	0	0	0	0	0	0	0
134875		0	0	0	0	0.129032	0	0	0	0	0	0	0	0	0	0	0	0	0	0	0	0	0	0	0	0	0	0	0	0	0	0
8410		0	0	0	2	0	0	0	0	0	1	0	0	0	0	0	0	0	0	0	0	0	0	0	0	0	0	0	0	0	0	0
1007064		0.0714286	0	0	0	0.5	0	0	0	0	0	0	0.0714286	0.142857	0	0	0	0.0909091	0	0	0	0	0	0	0	0	0	0	0	0	0	0
1127671		0	0.0535976	0	0	0	0	0	0.0890019	0	0	0	0	0	0	0	0	0	0	0	0	0	0.0285872	0	0.0127529	0	0	0	0.0251229	0	0	0
442694		0	0	0	0	0	0	0	0	0	0	0	0	0	0	0	0	0	0	0	0	0	0	0	0	0	0	0	0	1	0	0
3502		0	0	0	0	0	0	0	0	24.0937	0	0	0	0	1.51954	0.5	0	0	6.12657	0	9.56773	0	0.5	72.7517	0	0	3.5599	0	0	0	0	1.2599
933837		0	0	0	0	0	0	0	0	0	0	0	0	0	0	0	0	0	0.016	0	0	0	0	0	0	0	0	0	0	0	0	0
6669		1	0.0274254	0	0	0	0	0	0.0128205	0	0	0	0	0	0	0	0	0	0	0	0	0	0.0149254	0	0	0	0	0	0.0147059	0	0	0
869216		0	0.0434783	0	0	0.0434783	0	0	0.0434783	0	0	0	0.533333	0.0416667	0	0	0	0	0	0	0	0	0	0	0	0	0	0	0	0.111111	0	0
162484		0	0.111111	0.5	1	0	0	2	0	0	0	0	5.5	1	0	0	0	0	0	0	0	0	0	0	0	0	0	0	0	0	0.5	0
193		4.5	3	16.25	18.2778	258.125	6	17.25	3.5	0	5.02778	10.375	9.33333	0	0	0	23	5	0	0	0	0	5.375	0	3.2	45.6667	0	4.2	4.5	53.5833	2.33333	0
1096805		0	0	0	0	0.004	0	0	0	0	0	0.004	0.0434783	0	0	0	0	0	0	0	0	0.004	0	0	0	0	0	0	0	0	0	0
140110		0	1.5	0	0.5	1	1.33333	0	31.8333	0	0	1	0	0	0	0	0	1.5	0	0	0	0	183.417	0	0	0	0	0	4.5	0	0	0
54980		0	0	0	0	0	0	0	0	0	0.0153846	0	0	0	0	0	0	0	0	0	0	0	0	0	0	0	0	0.0042735	0	0	0.0303309	0
119		2.5	0	2	8	28.75	0	0.5	0	0	0.5	0	13.5	0	0	0	3	5.33333	0	0	0	0	0	0	0	20.5	0	2	0	11	1	0
133076		0	9	0	5.5	3	2.5	7.14286	0	10	9.9	3	1	0	0	0	0	1.5	2.83333	0	2	0	0	7.66667	0.333333	0	11.9167	3.17391	4	0	5	2.33333
10222		3	0	0	31.5	3	14	48.9583	0	91.3333	27.3333	0	3.2	1.5	4	0	1.33333	0	40.6667	0	7	0	0	39.8333	0.0111111	2	56.0864	17.7778	0	2	17.6667	5
993582		0	0	0	0	0	0	0	0	0	0	0	0	0	0	0	0	0	0.048	0	0	0	0	0	0	0	0	0	0	0	0	0
129949		0	1	0	7.01259	1	4	7.50746	6	7.17145	5.67687	95.2887	0	0	3.14573	0	2	2	9.61018	0	3.46059	1	15	21.5668	168.173	0	4.00276	1.25	0	0	2.16667	0.509901
159775		0	0	0	0	0	0	0	0	0	0	0	0.196429	0.142857	0	0	0	0	0	0	0	0	0	0	0	0	0	0	0	0	0	0
110061		0	0	0	0	2.07143	0	0	0	0	0	0	0	0	0	0	0	0	0	0	0	0	0	0	0	0	0	0	0	0	0	0
331636		0	0	0	0	1.36905	0	0	0	0	0	0	0.452381	0	0	0	0	0.0769231	0	0	0	0	0	0	0	0	0	0	0	0.571429	0	0
331529		0	0	0.0708749	0	0	0	0	0	0	0	0	0	0	0	0	0	0	0	0	0	0	0	0	0	0	0	0	0	0	0	0
429248		0	0	0	0	0	0	0	0	0	0	0	0	0	0	0	0	0	0	0	0	0	0.0199203	0	0	0	0	0	0	0	0	0
1085892		0	0.004	0	0	0	0	0	0.00395257	0	0	0.00395257	0	0	0	0	0	0	0	0	0	0	0.0198588	0	0	0	0	0	0.0158114	0	0	0
7946		0	0	0	0	0	0	0	0	0	0	0	0	0	0	0	0	0	0	0	0	0	0	0	0.00404858	0	0	0	0	0	0	0
641779		0	0	0.533333	0	0	0	0	0	0	0	0	0	0	0	0	0	0	0	0	0	0	0	0	0	0.111111	0	0	0	0	0	0
91844		2	0	0	0.0161812	0	0	0	0	0	0	0	0	1	0	0	0	0	0	0	0	0	0	0	0	0	0	0	0	0	0	0
67825		1	18.3465	0.2	5.00708	26.9127	0.5	3.33333	35.2947	0	0.5	11.4583	3.2	2	0	0	2.14286	0	0	0	0	0	7.5076	0	5.20691	4.02128	0	2.5	19.3045	7.64444	1	0
1090409		0	0	0	0	0	0	0	0.00395257	0	0	0	0	0	0	0	0	0	0	0	0	0	0.00395257	0	0	0	0	0	0	0	0	0
248758		0	0	0	0	0	0	0	0	0	0	0	0	0	0	0	0	0.00591716	0	0	0	0	0	0	0	0	0	0	0	0	0	0
84992		0	0	0	0	17.1	0	0	0.004	0	0	0	5	1	0	0	0.5	8.004	0	0	0	0	0	0	0	2	0	0	0	0.0909091	0	0
44055		5	0	0	0	2	0	0	0	0	0	0	0	0	0	0	0	9.02703	0	0	0	0	0	0	0	0	0	0	0	0	1	0
202485		0	0	0	0	0	0	0	0	0	0	0	0	0	0	0	0	0	0	0	0	0.25	0	0	0	0	0	0	0	0	0	0
8370		0	0	0	0	0	0	0	0	0	0	28.5	0	0	0	0	0	0	0	0	0	0	0	0	0	0	0	0	0	0	0	0
55447		0	0	0	0	0	0	0	0	0	0	0	0	0	0	0	0	0	0	0	0	0	0	0	0	0	0	0	0	0.5	0	0
126387		1	0	0	0	0	0	0	0	0	0	0	0	0	0	0	0	0	0	0	0	0	0	0	0	0	0	0.0042735	0	0	0	0
31022		0.695238	0	0	6	9.2	3	8.94595	0.666667	907.548	11.85	36.4048	2	0	5325.07	8139.45	6	1.5	1755.01	0	11280.6	0	9	7675.86	121.253	0	999.898	10.5	0	0	8.03448	0.648373
307972		1	0	0	0	0	0	0	0	0	0	0	0	0	0	0	0	0	0	0	0	0	0	0	0	0	0	0	0	0	0	0
1073847		0	0	0	0	0	0	0	0	0	0	0	0	0	0	0	0	0	0.016	0	0	0	0	0	0	0	0	0	0	0	0	0
6637		0	0	0	0	0	0	0	0	1	0	0	0	0	0	0	0	0	0	0	0	0	0	1	0	0	0.5	0	0	0	0	0
7601		0	0	0	0	0	0	0	0	0	0	0	0	0	0	0	0	0	0	0	0	0	0	0	0	0	0	0.0042735	0	0	0	0
1070319		0	0	0	0	0	0	0.5	0	0	0	0	0	0	0	0	0	0	0	0	0	0	0	0	0	0	0	0	0	0	0	0
57642		0	0	0	0	0	0	0	0	0	0	0	0	0	0	0	0	0	0	0	0	0	0	0	0	0	0.008	0	0	0	0	0
33260		1	0	0	0	0	0	0	0	0	0	0	0	0	0	0	0	0	0	0	0	0	0	0	0	0	0	0.0042735	0	0	0	0
391896		1.5	0	0	0.00323625	3.5	0	0	0	0	0	0	3.1	1	0	0	0	2.625	0	0	0	0	0	0	0	0.333333	0	0	0	2.5	0	0
5765		5.5	2	0	3.2	1	0	0.5	1	2	5	4	1.58333	1	0	0	0	3.33333	0	0	0	0	1	0	0	0	1.5	1.7	2	5	1	0
68889		0	0	0	1	0	0	0	0	0	1	0	0	0	0	0	0	0	0	0	0	0	0	0	0	0	0	0	0	0	0	0
7186		0	0	0	0	0	0	0	0	0	0	0	0	0	0	0	0	0	0	0	0	0	0	0	0.039283	0	0	0	0	0	0	0
221358		0	0	0	0	0	0	0	0	0	0	0	0	0	0	0	0	0.00398406	0	0	0	0	0	0	0	0	0	0	0	0	0	0
108466		0	0	0	0	0	0	0	0	0	0	0	0	0	0	0	0	0	0	0	0	0	0	0	0	0	0	0.0042735	0	0	0	0
129957		0	0	0	0	5.5	0	0	4	0	0	0	1.5	0	0	0	0	1	0	0	0	0	0	0	0	0	0	0	0	2	0	0
986136		0	0	0	0	0	0	0.00943396	0	0	0	0	0	0	0	0	0	0	0	0	0	0	0	0	0	0	0	0	0	0	0	0
490502		0	0	0	0	0	0	0	0.00204499	0	0	0	0	0	0	0	0	0	0	0	0	0	0	0	0	0	0	0	0	0	0	0
1095419		0	0	0	0	0	0	0	0	0	0	0	0	0	0	0	0	0	0	0	0	0.004	0	0	0	0	0	0	0	0	0	0
187594		0	0	0	0	0	0	0	0	0	0.00389105	0	0	0	0	0	0	0	0	0	0	0	0	0	0	0	0	0	0	0	0	0
644652		2	0	0.5	0	6.5	0	0	0	0	0	0	0	1	0	0	0	3.66667	0	0	0	1	0	0	0	0	0	0	0	0	0	0
8071		0	0	0	0	0	0	0	0	0	0	0.110119	0	0	0	0	0	0	0	0	0	0	0	0	0.689538	0	0	0	0	0	0	0
560808		0	0	0	0	0.0555556	0	0	0	0	0	0	0	0	0	0	0	0	0	0	0	0	0	0	0	0	0	0.0434783	0	0	0	0
936386		0	0	0	0	0	0	0	0	0	0	0	0	0	0	0	0	0	0.008	0	0	0	0	0	0	0	0	0	0	0	0	0
451868		1.2	0	0	3.125	5.2	1	2	3	1	4	0	2	7	0	0	0	4.33333	1	0	0	0	28.7	0	0	0	0	2	0	0.0833333	1.14286	0
266669		0	0	0	0	0	0	0	0	0	0	0	0	0	0	0	0	0.004	0	0	0	0	0	0	0	0	0	0	0	0	0	0
217090		0	0	0	0	0	0	0	0.00371747	0	0	0	0	0	0	0	0	0	0	0	0	0	0.00371747	0	0	0	0	0	0	0	0	0
768492		0	342.028	1.11111	0.673745	24.6588	0.333333	1	229.226	0	0	297.688	0.702703	0	0	0	1.91667	1.2	0	0	0	0.333333	209.847	0	126.392	2.11667	0	0.916667	337.432	3.25	0.5	0
644058		0	0	0	0	0	0	0	0	0	0	0	0	0	0	0	0	0	0	0	0	0	0	0	0	0	0	0	0	0	0	0
942669		0	0	0	0.266667	0	0.222222	0.977778	0	0	0.133333	0	0	0	0	0	0	0	0	0	0	0	0	0	0	0	0	0	0	0	0	0
939289		0.00561798	0	0	0	0	0	0	0	0	0	0	0	0	0	0	0	0	0	0	0	0	0	0	0	0	0	0	0	0	0	0
222558		0	0	0	0	0.004	0	0	0	0	0	0	0.00925926	0	0	0	0	0	0	0	0	0	0	0	0	0	0	0	0	0	0	0
196155		0	0	0	0	0	0	0	0	0	0	0	0	0	0	0	0	0	0	0	0	0	0	0	0	1	0	0	0	0	0	0
206387		0	0	0	0	0.004	0	0	0	0	0	0	0.00925926	0	0	0	0	0	0	0	0	0	0	0	0	0	0	0	0	0	0	0
121236		0	0	0	0.166667	0	0	2	0	1.5	0	0	0	0	0	0	0	0	1	0	0	0	0	1	1	0	4	0	0	0	0	0
436491		4.9	0	1	61.4268	13.6333	29	97.7182	0	40.4893	45.0406	24.6667	6.57143	2.13718	5.63735	0	6	12.7381	12.9198	0	8.01254	0	0.666667	66.4971	13.6059	0	23.7336	28.5	1	0	44.2405	5.40314
1073845		0	0	0	0	0	0	0	0	0	0	0	0	0	0	0	0	0	0.016	0	0	0	0	0	0	0	0	0	0	0	0	0
1111732		0	0	0	0.00323625	0	0	0	0	0	0	0	0	0	0	0	0	0	0	0	0	0	0	0	0	0	0	0	0	0	0	0
8990		0	0	0	0	0	0	0	0	16.2274	0	0	0	0	3.63735	0	0	0	2.9198	0	4.21254	0	0	60.4305	0	0	4.3948	0	0	0	0	2.40314
199891		0	0.0147059	0	0.00970874	0	0	0	0.0166178	0	0	0	0	0	0	0	0	0	0	0	0	0	0	0	0	0	0	0	0	0	0	0
743578		0	0	0	0	1	0	0	0	0	1	0	0	0	0	0	0	27	0	0	0	0	0	0	0	0	0	0	0	0	0	0
364317		0	20.921	10	19.0406	115.583	7	20	13.6498	0	5.66667	23.389	4.66667	0	0	0	5	1	0	0	0	0	4.60628	0	7.37735	11.3333	0	6.14286	7.97392	9.33333	7.2	0
496866		0.25	0.170206	0.111111	0	0.686111	0	0	0.0242424	0	0	0.25	4.55833	0.8	0	0	0	0.2	0	0	0	0	0.0510204	0	0	0	0	0	0.0445349	0.333333	0	0
1260		5	0	0.5	0	1	0	0	0	0	0	0	5	0.333333	0	0	0	5	0	0	0	0	0	0	0	0	0	0	0	1	0	0
167964		0	0	1	0.00647249	6	0	1	2	0	0	0	2	0	0	0	0	3.5	0	0	0	0	0	0	0	4	0	0	3	7	1	0
97264		0	0	0	0	0	0	0	0	0	0.00389105	0	0	0	0	0	0	0	0	0	0	0	0	0	0	0	0	0	0	0	0	0
238034		0	0	0	0	0	0	0	0	0	0	0	0	0	0	0	0	0	0	0	0	0	0	0	0	0	0	0.111111	0	0	0	0
1708		1.33333	0	4	1	6	0	1	0	0	0	0.5	4.4	0	0	0	0	4.06667	0	0	0	0	0	0	0.5	0.333333	0	1.5	0	0.5	1	0
58666		0	0	0	0	0	0	0	0	0	0	0	0	0	0	0	0	0	0	0	0	0	0	0	0	0	0	0.393939	0	0	0	0
8043		0	0	0	0	0	0	0	0	0	0	0.110119	1	0	0	0	0	0	0	0	0	0	1	0	1.26371	0	0	0	0	0	0	0
596146		0	0	0	0	0	0	0	0	0	0	0	0	0	0	0	0	0	0	0	0	0	0	0	0.00555556	0	0	0	0	0	0	0
98850		0	0	0	0	0	0	0	0	0	0.0307692	0	0	0	0	0	0	0	0	0	0	0	0	0	0	0	0	0.00854701	0	0	0.0606618	0
545693		3	7.26062	0	0	2.125	0	0	15.0833	0	0	5.66667	4	0	0	0	0	0.833333	0	0	0	0	9.7	0	1.5	1.83333	0	0	3.66667	1	0	0
1390		1	4.54336	0.805195	1	11.1667	0	0	15.1152	0	0	5.5873	5.92308	0.461538	0	0	0	1.46154	0	0	0	0	6	0	1	3.72222	0	0	4.14286	2.66667	0	0
330923		0	0.0924841	0	0.00323625	0	0	0	0.198661	0	0	0.037063	0	0	0	0	0	0	0	0	0	0	0.028624	0	0	0	0	0	0.0318041	0	0	0
182742		0	0	0	0	0	0	0	0	0	0	0	0	0	0	0	0	0	0	0	0	0	0	0	0	0	0.0135135	0	0	0	0	0
246410		0	0	0	0	0	0	0.5	1.5	0	0	0	0	0	0	0	0	1	0	0	0	0	1	0.5	0	0	0	0	0	0	0	0
548221		0	0	0	0	0	0	0	0	0	0	0	0	0	0	0	0	0	0	0	0	0	0	0	0	0	0	0.0434783	0	0	0	0
82367		0	0	5.75	3	33.75	4.33333	2	0	0	0	0	0	0	0	0	1	0	0	0	0	0	0	0	0	3	0	2	7	3	4	0
34450		0	0	0	0	0	0	0	0	0	0	0	0	0	0	0	0	0.75	0	0	0	0	0	0	0	0	0	0	0	0	0	0
102399		0	0	0	0	0	0	0	0	0.020979	0	0	0	0	0	0	0	0	0.46297	0	0	0	0	0.0909091	0	0	0.359684	0	0	0	0	0
723556		0	0	0	0	1	0	0	0	0	0	0	0	0	0	0	0	0	0	0	0	0	0	0	0	1	0	0	0	0	0	0
9788		0	0	0	11.2172	23.4667	1.91667	13.0278	0	1.5172	10.6944	3	0	0	0.0542025	0	1	0	3.18414	0	1.2771	0	0	3.3323	2.09646	0	3.0154	9.25	0	0	0.666667	0.134901
755732		15.3333	0	26	1	19.8333	0	0	2	0	0	0	139.5	15	0	0	0	30.5	0	0	0	0	1	0	0	30.5	0	0	0	101	2	0
182337		2	27.3003	1	0.00707786	10.1667	1	2.33333	23.3194	0	0.533333	27.5833	3.7	1.5	0	0	1.33333	1	0	0	0	0	13.25	0	9.532	7	0	2.25	18.2916	19.75	0.333333	0
231346		0	0	0	0	0	0	0	0	0	0	0	0	0	0	0	0	0	0	0	0	0	0	0	0	0	0.0135135	0	0	0	0	0
499229		3	0	0	0	0.75	0	0	0	0	0	0	3.41667	0	0	0	0	1	0	0	0	0	0	0	0	0	0	0	0	4	0	0
535732		0	0	0	0	0.333333	0	0	0	0	0	0	0	0	0	0	0	0	0	0	0	0	0	0	0	0	0	0	0	0	0	0
118588		0	0	0	0	0	0	0	0	0	0.00389105	0	0	0	0	0	0	0	0.00505051	0	0	0	0	0	0	0	0	0	0	0	0	0
323802		0	0	0	0.027027	0	0	0	0	0	0	0	0	0	0	0	0	0	0	0	0	0	0	0	0.34881	0	0	0	0	0	0	0
36856		0	0	0	0	2.22222	0	0	0	0	0	0	0	1	0	0	0.222222	0	0	0	0	0	0	0	0	0	0	0	0	0	0	0
354393		0	0	0	0	0	0	0	0	0	0	0	0	0	0	0	0	0.004	0	0	0	0	0	0	0	0	0	0	0	0	0	0
114760		0	0	0	0	0	0	0	0	0	0	0	0	0	0	0	0	0	0	0	0	0	0	0	0	0	0.004	0	0	0	0	0
55693		0	0	0	0	0	0	0	0	0	0	0	0	0	0	0	0	0	0.156923	0	0	0	0	0	0	0	0	0	0	0	0	0
150247		1	2.00708	0	0	3.5	0	0	5.70519	0	0	0	6.5	2	0	0	0	2	0	0	0	0.0714286	1.5	0	0	1	0	0	2	2	0	0
13578		0	0	0	0	0	0	0	0	0	0	0	0	0	0	0	0	0	0	0	0	0	0	0	0	0	0	0	0	0	0.333333	0
48194		0	0	0	0	0	0	0	0	0	0	0.047619	0	0	0	0	0	0	0	0	0	0	0	0	0.0986291	0	0	0	0	0	0	0
281038		0	0	0	0	0	0	0	0	0	0.0714286	0	0	0	0	0	0	0	0	0	0	0	0	0	0	0	0	0	0	0	0	0
216780		0	0	0	1	0	0	0	0	0	1	0	0	0	0	0	0	0	0	0	0	0	0	0	0	0	0	2	0	0	0	0
361472		0	0	0	0	0	0	0	0	0	0	0	0	0	0	0	0	0	1.02091	0	0	0	0	0.004	0	0	0	0	0	0	0	0
74546		28.3667	0	0	1	2.25	0	7	0	0	0	0	9.91667	1.5	0	0	0	96.477	0	0	0	0	0	0	0	0	0	1.5	0	0	2	0
62677		0	0	0	0.00647249	0	0	0	0	0	1	0	21.0516	1.17523	0	0	0	6.03175	0	0	0	0	0	0	0	0	0	0	0	0	0	0
314890		0	0	0	0	0.0151515	0	0	0	0	0	0	0	0	0	0	0	0	0	0	0	0	0	0	0	0	0	0	0	0	0	0
3542		0	0	0	0	0	0	0	0	0	0	0	0	0	0	0	0	1	0	0	0	0	0	0	0	0	0	0	0	0	0	0
50634		0	0	0	0	0	0	2	0	0	4	0	0	0	0	0	0	0	0	0	0	0	0	0	0	0	0	2	0	0	0	0
133448		0	0	0	0	0	0	0	0	0	0	0	0	0	0	0	0	0	0	0	0	0	0	0	0	0	0	0	0.0243902	0	0	0
519		0.5	2.8035	2.7	13.8167	50.3052	1.08333	9.35	3.22048	0	3.61667	3.74286	0.25	0	0	0	2.58333	1	0	0	0	0	5.35375	0	2.41031	6.7	0	2.96667	4.15621	3.95	5.95952	0
587754		0	0	0	0	0	0	0	0.004	0	0	0	0	0	0	0	0	0	0	0	0	0	0.00371747	0	0.004	0	0	0	0	0	0	0
1050928		0	0	0	0	0	0	0	0	0	0	0	0	0	0	0	0	0	0	0	0	0.004	0	0	0	0	0	0	0	0	0	0
6383		0	0	0	1	0	0	0.166667	0	0	0.170558	0	0	0	0	0	0	0	0.016	0	0	0	0	0.75	0	0	0	0	0	0	0	0
37692		0	0	0	0	1	0	0	0	0	0	0	1.5	0	0	0	0	3	0	0	0	0	0	0	0	0	0	0	0	2	0	0
45059		0	0	0	0	0	0	1	0	0	0	0	0	0	0	0	0	0	0	0	0	0	0	0	0	0	0	0	0	0	0	0
336179		0	0	1.02705	0	0	0	0	0	0	0	0	0	0	0	0	0	0	0	0	0	0	0	0	0	0	0	0	0	0	0	0
96561		1.25	1	8	0.00323625	45.1667	0	2	0	0	0	0	0	0	0	0	2	8.83333	0	0	0	0	0	0	0	2.5	0	0	0	20.3889	0	0
71617		0	0	0	0	0	0	0	0	0	0	0	0	0	0	0	0	0	0	0	0	0	0.0199203	0	0	0	0	0	0	0	0	0
85300		0	0	0	0	0	0	0	0	0	0	0	0	0	0	0	0	0	0.00505051	0	0	0	0	0	0	0	0	0	0	0	0	0
771870		1.125	0.366667	11	2.14286	35.3333	0	0.333333	5.33333	0	3	1	2	0	0	0	0	0	0	0	0	0	72.3333	0	0	8.25	0	1.5	0	1	2	0
59203		0	6.41735	1	0.0600215	18.5	1	0	14.7453	0	0	8.5	3.5	1.5	0	0	2	3.05882	0	0	0	0	3.0076	0	1.05954	2.04348	0	0	2.8485	3	0	0
497978		0.652027	0.0159151	1.5	0	1.22318	0	0	0.4	0	0	0	1.64405	0.0909091	0	0	0.0135135	0.758333	0	0	0	0	0.211111	0	0	0.215007	0	0	0.0143541	0.75	0	0
866629		0.833333	0.00176991	0	0	0.666667	0	0	0	0	0	0	7.53333	0	0	0	0	1	0	0	0	0	0	0	0	0.111111	0	0	0	0.111111	0	0
36151		0.25	0	0	0	0	0	0	0	11.8839	0	0	0	0	0.804203	0	0	0	3.17657	0	2.5271	0	0	37.1036	0	0	0.676568	0.434783	0	0	0	0.00990099
77654		0	0	0	0	0	0	0	0	0	0	0	0	0	0	0	0	1	0	0	0	0	0	0	0	0	0	0	0	0	0	0
319225		1	0	0	0	9.5	0	1	0	0	0	0	0.5	0	0	0	0	0	0	0	0	0	0	0	0	4.5	0	0	0	0.333333	1.5	0
8139		10	0	0	48.2361	14	13.8333	56.8041	5	6	49.75	634.143	1.19048	0	0	0	6.75	1	1.5	0	1	3	40	3.6	995.542	1	2.41667	28	0	1	25	0
66913		0	0	0	1.25	0	0	2	0	0	2	0	0	0	0	0	1	0	1	0	0	0	0	0	0	0	0	1	0	0	0	0
688394		0	0	0	0	0	0	0.2	0	0	0	0	0	0	0	0	0	0	0	0	0	0	0	0	0	0	0	0	0	0	0	0
9646		0	0	0	7.44359	2.4	4.16667	12.2756	1	2	7.69106	1.5	0	0	0	0	1.5	0	1.33333	0	0	0	0	0	2.5	0	1.21978	4.22619	0	0	4.2	0
743624		0	0	0	0	0	0	0	0	0	0	0	4	2	0	0	0	2	0	0	0	0	0	0	0	0	0	0	0	0	0	0
475616		0	0	0	0	0	0	0	0	0	0	0	0	0	0	0	0	0	0.00505051	0	0	0	0	0	0	0	0	0	0	0	0	0
8112		6	0	1	7.52703	1.18992	3	11.4167	34	6.44466	6.53571	2833.84	0	0	0.219516	0	0	2	4.0198	2	4.37642	9	432.6	9.42809	4166.41	0	2.0698	2.05	0	1.33333	2.02703	0.019802
1074882		0	0	0	0	0.5	0	0	0	0	0	0	0	0	0	0	0	0	0	0	0	0	0	0	0	0	0	0	0	0	0	0
63765		0	0	0	0	0	0	0	0	0	0	0	0	0	0	0	0	0	0	0	0	0	0	0	0	0	0	0	0	0	0	0
56901		0.5	0	0	0	0	0	0	0	0	0	0	0	0	0	0	0	0	0	0	0	0	0	0	0	0	0	0	0	0	0	0
109744		0	0	0	1	0	0	0	0	0	5	0	0	0	0	0	0	0	0	0	0	0	0	0	0	0	0	0	0	0	0	0
55207		0	0	0	0	0	0	0	0	0	0	0	0.018018	0	0	0	0	0	0	0	0	0	0	0	0	0	0	0	0	0	0	0
1072459		0	0.47126	0.0537037	0.692099	0.693042	0	0	2.37324	0	0.514925	0.0625	0.333333	0	0	0	0	0.0322581	0	0	0.0588235	0	0.0268312	0	0.385452	0.603768	0	0	0.900511	0.102698	0.0526316	0
121166		0	0	0	2	0	0	0	0	0	1	0	0	0	0	0	0	0	0	0	0	0	0	0	0	0	0	0	0	0	0	0
297674		0.0434783	0	0	0	0	0	0	0	0	0	0	0	0	0	0	0	0	0	0	0	0	0	0	0	0	0	0	0	0	0	0
743658		0	0	0	0	0	0	0	0	0	0	0	1	0	0	0	0	0	0	0	0	0	0	0	0	0	0	0	0	0	0	0
351600		0	0	0	0	1	0	0	0	0	0	0	0	0	0	0	0	0	0	0	0	0	0	0	0	0	0	0	0	0	0	0
371155		0	0	0	0	0	0	0	0	0	0	1.33333	0	0	0	0	0	0	0	0	0	0	0	0	0	0	0	0	0	0	0	0
33099		0	0	0	0	0	0	0	0	0	0	0	0	0	0	0	0	1	0	0	0	0	0	0	0	0	0	0	0	0	0	0
37752		0	0	0	0	0	0	0	0	0	0	0	1.5	0	0	0	0	0	0	0	0	0	0	0	0	0	0	0	0	0	0	0
551290		1	0	0	0.125	0	0.333333	0	0	3.5	0.333333	0.110119	0	0	0	0	0	0	5.66667	0	0	0	0	1	0.0986291	0	2.83333	0.333333	0	0	0	0
274539		0	0	0	1	4.5	1	1.5	0	0	0	0	0	0.5	0	0	1	3	0	0	0	0	0	0	0	4	0	2	0	3	0	0
247868		0	0	0	0	0	0	0	0	0	0	0	0	0.0625	0	0	0	0	0	0	0	0	0	0	0	0	0	0	0	0	0	0
65344		0	0	0	0	0	0	0	0	0	0	0	0	0	0	0	0	0	0.5	0	0.5	0	0	0	0	0	1	0	0	0	0	0
85078		0	0	0	0	27.6667	0	0	0	0	0	0	0	0	0	0	18.8333	0	0	0	0	0	0	0	0	0	0	0	0	0	0	0
582249		0	0	0	0	0	0	0.00833333	0	0	0	0	0	0	0	0	0	0	0	0	0	0	0	0	0	0	0	0	0	0	0	0
71187		0	0	0	0	0	0	0.027027	0	0	0	0	0	0	0	0	0	0	0	0	0	0	0	0	0	0	0	0	0	0	0	0
884236		0	0	0	0	0	0	0	0	0	0	0	0	0	0	0	0	0	0	0	0	0	0	0	0	0	0.004	0	0	0	0	0
33924		0	0	0	0.00323625	0	0	0	0	0	0	0	0	0	0	0	0	0	0	0	0	0	0	0	0	0	0	0	0	0	0	0
253718		0	0	0	0	0	0	2	0	0	0	0	0	0	0	0	0	0	0	0	0	0	0	0	0	0	0	0	0	0	0	0
714600		0	0	0	0	0	0	0	0	0	0	0	0	0	0	0	0	0	0.024	0	0	0	0	0	0	0	0	0	0	0	0	0
83332		0	0.0588235	0.125	0.225	2.13403	0.0625	0.346324	0	0	0	0.0588235	0.102302	0	0	0	0	0.263361	0	0	0	0	0	0	0	0.1875	0	0.1625	0	0	0.121324	0
243282		0	0	0	0	0	0	0	0	0	0	0	0	0.285714	0	0	0	0	0	0	0	0	0	0	0	0	0	0	0	0	0	0
371109		0	0	0	0	0	0	1	0	0	1	0	0	0	0	0	0	0	0	0	0	0	0	0	0	0	0	1	0	0	0	0
72021		0	0	1	0	0	0	0	0	0	0	0	0	0	0	0	0	0	0	0	0	0	0	0	0	6	0	0	0	0	0	0
1004562		0	0	0	0	0	0	0	0	0	0	0.004	0	0	0	0	0	0	0	0	0	0.004	0	0	0	0	0	0	0	0	0	0
289401		0	0	0	0	50.3333	0	0	0	0	0	0	0	0	0	0	0	0	0	0	0	0	0	0	0	0	0	0	0	0	0	0
151161		0	0	0	0	0.004	0	0	0	0	0	0	0	0	0	0	0	0	0	0	0	0	0	0	0	0	0	0	0	0	0	0
535382		0.25	0	0	1	0	0	0	0	0	0	0	0	0	0	0	0	0	0	0	0	0	0	0	0	0	0	0	0	0	0	0
31276		0	0	0	1	1.5	0	2	0	0	3	0	1	0.25	0	0	0	0	0	0	0	0	0	1	0	0	0	0	0	1	0	0
509932		0	0	0	0	0	0	0.5	0	0	0	0	0	0	0	0	0	0	0	0	0	0	0	0	0	0	0	0	0	0	0	0
301955		0	0	0	0	0	0	0	0	0.0734777	0	0	0	0	0.0691605	0	0	0	11.8465	0	0.0455408	0	0	1.51687	0	0	1.71547	0	0	0	0	0.333333
84635		0	1	0	0	0	0	0	0	0	0	0	0	0	0	0	0	0	0	0	0	0	1	0	1	0	0	0	1	0	0	0
64495		0	0	0	0	0	0	0	0	0	1	0	0	0	0	0	0	0	0	0	0	0	0	0	0	0	0	0	0	0	0	0
215359		0	0	0	0	0	0	0	0	0	0	0	0	0	0	0	0	0	0	0	0	0	0	0	1	0	0	0	0	0	0	0
870570		0	0	0	0	0	0	0	0	0	0	0	0	0	0	0	0	0	0.00505051	0	0	0	0	0	0	0	0	0	0	0	0	0
7659		0	0	0	0	0	0	2	0	1.54352	0	0	0	0	1.13315	0	0	0	0.00990099	0	0.193768	0	0	5.90824	0	0	0.00990099	0	0	0	1	0.00990099
170577		0	0	0	0.0694444	0	0	0	0	0	0.0714286	0	0	0	0	0	0	0	0	0	0	0	0	0	0	0	0	0	0	0	0	0
930946		0	0.000884956	0	0	0	0	0	0	0	0	0	0	0	0	0	0	0	0	0	0	0	0	0	0	0	0	0	0	0	0	0
556		0	0.125	0	0	2.16667	0	0	0.590909	0	0	0.833333	0.00900901	0	0	0	0	1	0	0	0	0	0	0	0	0	0	0	0	0	0	0
82996		0	3.6	0	0	0	0	0	1.25	0	0	5.04286	0	0	0	0	0	0	0	0	0	0	1.258	0	1	0	0	0	0.6	0	0	0
43256		0	0	0	0	0	0	0	0	0	0	0	0	0	0	0	0	0	0	0	0	0	0	0	0.00976287	0	0	0	0	0	0	0
980514		0.152027	0.0106101	1.5	0	1.22318	0	0	0.4	0	0	0	2.14405	0.0909091	0	0	0.0135135	0.758333	0	0	0	0	0.211111	0	0	0.215007	0	0	0.00956938	0.25	0	0
507522		0	11.5159	0.5	1.52644	11.0522	0.25	0.333333	24.4456	0	1.25	19.6802	1	0	0	0	0.333333	1.36667	0	0	0	0	10.8754	0	0.313901	2.83333	0	0	10.636	5.15833	0.333333	0
624186		5.5	0	1.33333	1.5	6.2	0	0	0	0	0	0	12.4167	2.5	0	0	0	5.83333	0	0	0	0	0	0	0	2	0	0	0	1.5	0.166667	0
458032		0	0	0	8	35	0	2.25	0	0	0	0	3	1	0	0	4	4	0	0	0	0	0	0	1	3.5	0	0.5	0	0	0.5	0
151528		0	0	0	0	0	0	0	0	0	0	0	0	0	0	0	0	3.5	0	0	0	0	0	0	0	0	0	0	0	0	0	0
31932		8.5	0	0	0	650.5	7	91	0	0	1	0	330	64.5	0	0	24	79	0	0	0	0	0	0	0	2	0	23	0	0	0	0
529148		0	0	0	0	0	0	0	0	0	0	0	0	0	0	0	0	0	0.064	0	0	0	0	0.016	0	0	0	0	0	0	0	0
279648		0	0	0	0	0	0	0	0	0	0	0	0	0	0	0	0	0	0	0	0	0	0	0	0	0	0	0.0042735	0	0	0	0
244475		0	0	0	0	0	0	0	0	0	0	0	0	0	0	0	0	0	0.004	0	0	0	0	0	0	0	0	0	0	0	0	0
6373		0	0	0	2.66667	0	2.66667	1.66667	0	0	1.00389	0	1	0	0	0	0	0	0.010101	0	0	0	0	0.004	0	0	1	0.00854701	0	0	2	0
69691		0	0	0	0	0	0	0	0	0	0	0	0.5	0	0	0	0	0	0.016	0	0	0	0	0	0	0	0	0	0	0	0	0
562694		0	0	0	0	0	0	0	0	0	0	0	0	0	0	0	0	0.004	0	0	0	0	0	0	0	0	0	0	0	0	0	0
84350		0	0	0	0	0	0	0	0	0	0	0	0	0	0	0	0	0	0.010101	0	0	0	0	0	0	0	0	0	0	0	0	0
32521		0	0	0	0	0	0	0	0	0	0	0	0	0	0	0	0	0	0	0	0	0	0	0	0.149096	0	0	0	0	0	0	0
194699		0	0	0	0	0	0	0	0	0	0	0.333333	0	0	0	0	0	0	0	0	0	0	0	0	0	0	0	0	0	0	0	0
198480		0	0	0.178331	0	0	0	0	0	0	0	0	0	0	0	0	0	0	0	0	0	0	0	0	0	0	0	0	0	0	0	0
46731		0	0	0	0	0	0	0	0	11.6601	0	0	0	0	3.5542	0	0	0	1.3599	0	4.34212	0	0	28.5309	0	0	4.57492	0	0	0	0	0.259901
1501		0	0	0	0	1	0	0	0	0	0	0	2	0	0	0	0	0	0	0	0	0	0	0	0	0	0	0	0	0	0	0
78579		2	1	0	0	4.66667	0	0	5.5	0	0.00389105	0	0	0	0	0	0	1	0	0	0	0	31.1707	0	0	1	0	0	0	2	0	0
749450		0	0	0	0	0	0	0	0	0	0	0	0	0	0	0	0	0	0	0	0	0	0.012	0	0	0	0	0	0.004	0	0	0
549		0	0.617628	0	0	0.473684	0	0	0.593209	0	0	0.289031	0	0	0	0	0	0	0	0	0	0	0.256489	0	0.0579832	0	0	0	0.0294118	0	0	0
399996		0	0	0	0	0	0	0	0	1	0	0	0	0	0	0	0	0	0	0	0	0	0	0	0	0	0	0	0	0	0	0
473531		0	0	4.5	2.66667	128.389	1	0.666667	0	0	0.833333	0	6.75	0	0	0	0.833333	2	0	0	0	0	0	0	0	3.33333	0	1	0	6.5	1.16667	0
521006		0.0555556	0	0.333333	4.21745	4.51293	1.91422	5.84106	0	0	1.55882	0	0.117647	0	0	0	0.0769231	0.0555556	0	0	0	0	0	0	0.142857	0	0	1.56581	0	0.333333	3.02019	0
319701		0	0	0	0	0.5	0	0	0	0	0	0	0.1875	0	0	0	0	0.0769231	0	0.2	0	0	0	0	0	0	0	0	0	0.0666667	0	0
558553		0	0	0	0	1	0	0	0	1	0	0	0	0	0	0	0	0	0.5	0	0	0	0	1	0	0	0	0	0	0	0	0
1050767		0	0.0288737	0	0	0	0	0	0.0379031	0	0	0.00671141	0	0	0	0	0	0	0	0	0	0	0.0261111	0	0	0	0	0	0.0319676	0	0	0
74152		0	0	1	0	1	0	0	0	0	0	0	6	2	0	0	1	2.5	0	0	0	0	0	0	0	1	0	0	1	4	0	0
7230		0	0	0	1	1.66667	1	9.5	0	0	2	0	0	0	0	0	0	0	0	0	0	0	0.333333	1	0	2.18182	1	3	0	0	1	0
458822		0	0	0.062037	0	0	0	0	0	0	0	0	0	0	0	0	0	0	0	0	0	0	0	0	0	0	0	0	0	0	0	0
106604		0	0	0	0	0	0	0	0.00840336	0	0	0	0	0	0	0	0	0	0	0	0	0	0	0	0	0	0	0	0	0	0	0
30300		0	0	0	0	0	0	0	0	0	1	0	0	0	0	0	0	0	0	0	0	0	0	0	0	0	0	0	0	0	0	0
300862		0	0	0	0	0	0	0	0	0	0	0	0	0	0	0	0	0	0	0	0	0	0	0	0	0	0	0	0.00657895	0	0	0
927626		0	0	0	0	0	0	0	7.5	0	0	0	0	0	0	0	0	0	0	0	0	0	0	0	0	0	0	0	0	0	0	0
542504		0	0	0	0	0	0	0	0	0	0	0	1	0.5	0	0	0	0.5	0	0	0	0	0	0	0	0	0	0	0	0	0	0
307596		2	0	0	12.4	11.25	1	7.83333	0	0	4	1	0	0	0	0	0	1	0	0	0	0	0	0	0	2.5	0	1.56667	0	2	6.7	0
117959		0	0	0	0	0	0	0	0	0	0	0	0	0	0	0	0	0.00591716	0	0	0	0	0	0	0	0	0	0	0	0	0	0
32446		0	0	0	0.666667	0	0	2.66667	0	1.98556	0	0	0	0	1.57541	0	0	0	0.258386	0	0.390738	0	1.5	13.1168	0	0	1.06407	0	0	0	0.444444	1.10081
33038		0	0	0	0	0	0	0	0	0	0	0	0	0	0	0	0	0	0	0	0	0	1	0	0	0	0	0	0	0	0	0
640211		0	0	0	0	2	0	0	0	0	0	0	0	0	0	0	0	0	0	0	0	0	0	0	0	0	0	0	0	0	0	0
585294		0	0	0	0	0	0	0	0	0	0	0	0	0	0	0	0	0.004	0	0	0	0	0	0	0	0	0	0	0	0	0	0
223439		0	0	0	0	0.004	0	0	0	0	0	0	0.00925926	0	0	0	0	0	0	0	0	0	0	0	0	0	0	0	0	0	0	0
41071		0.25	0	0	1	0	0	0	0	0	0	0	2	0	0	0	0	0.2	3	0	0	0	0	1	0	0	0	0	0	0	0	0
1115980		0	0.008	0	0	0	0	0	0.008	0	0	0.004	0	0	0	0	0	0	0	0	0	0	0.00390625	0	0.00390625	0	0	0	0	0	0	0
583		1.16667	1.67123	1.00781	0.00101112	12.0425	0	0	1.9914	0	1	0.497835	10.2	3	0	0	0.166667	6	0	0	0	0	0.546327	0	0.452342	1.33978	0	0	2.02113	16.6429	0	0
999257		0	0	0	0	0	0	0	0	0	0	0	0	0	0	0	0	0	0	0	0	0	0	0	0	0	0.008	0	0	0	0	0
313555		0	0	0	0	0	0	0	0	5	0	0	0	0	0	0	0	0	0	0	0	0	0	4	0	0	0	0	0	0	0	0
69685		0	0	0	0	0	0	0	0	0	0	0	0	0	0	0	0	0	0	0	0	0	0	0	0	0	0.008	0	0	0	0	0
69698		0	0	0	0	0	0	0	0	0	0	0	0	0	0	0	0	0	0.00505051	0	0	0	0	0	0	0	0	0	0	0	0	0
984454		0	0	0	0	0	0	0	0	0	0	0	0	0	0	0	0	0	0	0	0	0	0	0	0	0	0	0.0434783	0	0	0	0
613165		0	0	0	0	0	0	0	0	0	0	0	0	0	0	0	0	0	0	0	0	0	0	0	0.00571429	0	0	0	0	0	0	0
41197		1.25	0	0	24.2	3.5	8.33333	20.6667	1.00204	112.782	15.6667	0	7	0	14.8192	1.7875	0	2.88889	29.8272	0	31.8286	0	0	289.556	0	1	51.7265	21.2	0	0	5.30882	6.16698
7535		0	0	0	0	0	0	0	0	0	0	0	0	0	0	0	0	0	0.666667	0	0	0	0	0	0	0	0	0	0	0	0	0
37347		0	0	0	1.1	0	0	0	0	0	0.109856	0	0	0	0	0	0	0	0	0	0	0	0	0	0	0	0	0	0	0	0	0
115871		0	0	0	0	0	0	0	0	0	0	0	0	0	0	0	0	0	0	0	0	0	0	0	0.00976287	0	0	0	0	0	0	0
394564		0	0	0	0	0	0	0	0	0	0	0	0	0	0	0	0	0	0	0	0	0	0	0	0	0	0	0	0	0	0.142857	0
1033854		2	13	9.5	9.10882	626.385	4.33333	21.7833	4.75	1	6.16667	3.25	25.0833	0	0	0	33.8667	21.3333	0	0	0	0	2	0	4.6	27.5833	0	6.5	9.34286	27.6667	5.5	0
96656		0	0	0	0	0	0	0	0	0	0	0	0	0	0	0	0	0	0	0	0	0	0	0	0	0	0	0.00854701	0	0	0	0
2341		0	0.00107643	0	0	0	0	0	0.0231837	0	0	1	0	0	0	0	0	0	0	0	0	0	0	0	1.16667	0	0	0	0	0	0	0
717608		0	0.000884956	1	0	1	0	0	0.5	0	0	0	1	0.5	0	0	0	0	0	0	0	0	0	0	0	1	0	0	0	1.5	0.5	0
85413		0	0.333333	4	0	2	0.333333	0.368627	0.5	0	0	0.333333	0	0	0	0	0.5	0	0	0	0	0	0	0	0	0	0	0	0	1	0	0
1036780		0	0	0	0	0	0	0	0	0	0	0	0	0	0	0	0	0	0	0	0	0	0	0	0	0	0	0	0	0.25	0	0
3827		0	0	0	0	0	0	0	0	0	0	0	1	0	0	0	0	0	0	0	0	0	0	0	0	0	0	0	0	0	0	0
865527		0	0	0	0	0	0	0	0.004	0	0	0	0	0	0	0	0	0	0	0	0	0	0	0	0	0	0	0	0	0	0	0
425944		0	0	0	0	0	0	0	0	0	0	0	0.111111	0	0	0	0	0.222222	0	0	0	0	0	0	0	0	0	0	0	0.1	0	0
211449		0	0	0	0	0	0	0	0	0	0	0	0	0	0	0	1	0	0	0	0	0	0	0	0	0	0	0	0	0	0	0
78331		0	0.0588235	0.125	0.225	30.0956	0.0625	0.346324	0	0	0	0.0588235	0.0588235	0	0	0	5	0.263361	0	0	0	0	0	0	0	0.125	0	0.1625	0	0	0.121324	0
1096258		0	0.0158888	0	0	0	0	0	0.0198413	0	0	0	0	0	0	0	0	0	0	0	0	0	0	0	0.00396825	0	0	0	0.00396825	0	0	0
537683		0	0	0	0	0	0	0	0	0	0	0	0	0	0	0	0	0.004	0	0	0	0	0	0	0	0	0	0	0	0	0	0
869555		0	0.028359	0	0	0	0	0	0.0420694	0	0	0	0	0	0	0	0	0	0	0	0	0	0.0804604	0	0.0332719	0	0	0	0.0555462	0	0	0
890402		1.1	0	0	0.6	0.671429	0	0.2	0.222222	0	0.1	0	0.342857	0	0	0	0	0.166667	0	0	0	0	0	0	0	0	0	0.190909	0	0.1	0.0714286	0
1625		1	0.00619469	0	0	1.5	0	0	0	0	0	0	4	1	0	0	0	1.2	0	0	0	0	0	0	0	0	0	0	0	1	0	0
321956		0	0	0	0	0.2	0	0	0	0	0	0.333333	0.25	0	0	0	0	0	0	0	0	0	0	0	0	0	0	0	0	0	0	0
507533		0	0	0	0	0	0	0	0	0	0	0	0	0	0	0	0	0	0.116	0	0	0	0	0	0	0	0	0	0	0	0	0
78194		0	0	0	0	0	0	0	0	0	0	0	0	0	0	0	0	0	0	0	0	0	0	0	0.0121457	0	0	0	0	0	0	0
52680		0	0	0	0	1	0	0	0	0	0	0	0	0	0	0	0	0	0	0	0	0	0	0	0	0	0	0	0	0	0	0
241670		0	0	0	0	0	0	0	0	0	0	0	0	0	0	0	0	0	0	0	0	0	0	0	0	0	2	0	0	0	0	0
473554		0	0	0	0	0	0	0	0	0	0	0	1	0	0	0	0	0	0	0	0	0	0	0	0	0	0	0	0	0	0	0
332161		1	1	2.33333	6.5	19.95	0	6	0	0	4	1	2	0	0	0	0	6	0	0	0	0	0	0	1	8	0	4.4	0	0	3	0
34018		3	2.16667	3	16	255.487	3.25	14.8333	2	0	6	0.5	7.5	1	0	0	16.5	10.1667	0	0	0	0	2	0	0.5	42.3333	0	9	0	27	6.5	0
1078739		0	0	0	0	0	0	0	0	0	0	0	0	0	0	0	0	0	0	0	0	0	0	0	0	0	0	0.2	0	0	0	0
655439		0	0	0	4.23377	0	1	1	0	0	2.00389	0	0	0	0	0	0	0	0	0	0	0	0	0	0	0	0	1	0	0	0	0
297308		2	0	0	12.4	10.3333	6.5	11.75	0	7.30832	8.5	0	1	0	0.879617	0	5	1	1.64202	0	2.66784	0	0	14.3824	0	1.25	6.09183	8.5	0	0	9	1.23571
481666		0	0	0	0	0	0	0	0	0.712565	0	0	0	0	0	0	0	0	0.606437	0	0.174726	0	0	0.193434	0	0	0.552053	0	0	0	0	0
8022		0	0	0	0.5	0	1	4.11111	0	11.2344	4.2	2.44097	0	0	1.87507	0	1	0	0.603135	0	3.61922	0	1.84211	27.2178	2.29259	0	3.58482	1.25	0	0	1.5	0.019802
267147		0	0	0	0	0	0	0	0	0	0	0	0	0	0	0	0	0.2	0	0	0	0	0	0	0	0	0	0	0	0	0	0
1131951		0	0	0	0	0	0	0	0	0	0	0	0	0	0	0	0	0.004	0	0	0	0	0	0	0	0	0	0	0	0	0	0
714605		0	0	0	0	0	0	0	0	0	0	0	0	0	0	0	0	0	0.024	0	0	0	0	0	0	0	0	0	0	0	0	0
493577		0	0	0	0	0	0	0	0	0	0	0	0	0	0	0	0	0	0	0	0	0	0	0	0	0	0	0	0	0.5	0	0
1084358		0	0	0	0	0	0	0	0	0	0	0.004	0	0	0	0	0	0	0	0	0	0.004	0	0	0	0	0	0	0	0	0	0
871455		0.25	0	0	0	0	0	0	0	0	0	0	0	0	0	0	0	0	0	0	0	0	0	0	0	0	0	0	0	0	0	0
857891		0	0	0	0	0	0	0	0	0	0	0	0.0227273	0	0	0	0	0	0	0	0	0	0	0	0	0	0	0	0	0	0	0
100234		0	0	0	0	0	0	0	0	0	0	0	0	0	0	0	1	0	0	0	0	0	0	0	0	0	0	0	0	0	0	0
933812		0	0	0	0	0	0	0	0	0	0	0	0	0	0	0	0	0	0.016	0	0	0	0	0	0	0	0	0	0	0	0	0
98923		0	0	0	0	0	0	0	0	0	0	0	0	0	0	0	0	0	0	0	0	0	0	0	3	0	0	0	0	0	0	0
4492		0	0	0	0.0120482	0	0	0	0	0	0	0	0	0	0	0	0	0	0	0	0	0	0	0	0	0	0	0	0	0	0.012987	0
7511		0	0	0	0	0	0	0	0	0	0	0	0	0	0	0	0	0	1	0	0	0	0	0	0	0	1	0.00854701	0	0	0	0
98794		3	0	0	0	1.41667	0	0	0	0	0	0	5.1	0	0	0	0	11.6667	0	0	0	0	0	0	0	0	0	0	0	1	0	0
380025		0	0	0	0	0	0	0	0	0	0.0285714	0	0	0	0	0	0	0	0	0	0	0	0	0	0	0	0	0	0	0	0.025641	0
191287		0	0	0	0	0	0	0	0	0	0	0	0	0	0	0	0	0	0	0	0	0	0	0	0	0	0	0	0	0	0	0
455519		2	0	0	0	1.5	0	0	0	0	0	0	4.83333	1	0	0	0.5	1	0	0	0	0	0	0	0	0	0	0	0	0	0	0
191788		0	0	0	0	0	0	0	0	1	0	0	0	0	0	0	0	0	0	0	0	0	0	1	0	0	0	0	0	0	0	0
743531		0	0	0	0	0	0	0	0	0	0	0	0	0	0	0	0	2	0	0	0	0	0	0	0	0	0	0	0	0	0	0
525381		0	0.0434783	0	0	0	0	0	0.0434783	0	0	0	0	0	0	0	0	0	0	0	0	0	0	0	0.2	0	0	0	0	0.111111	0	0
94938		0	0	0	0	0	0	0	0	0	0	0	0	0	0	0	0	0	0	0	0	0	1	0	0.00555556	0	0	0	0	0	0	0
542360		0	0	0	0	0	0	0	0	0	0	0	0	0	0	0	0	1.5	0	0	0	0	0	0	0	0	0	0	0	0	0	0
3568		0	0	0	0	0	0	0	0	11.0172	0	0	0	0	1.0542	0	0	0	0.00990099	0	1.0271	0	0	30.1536	0	0	4.0099	0	0	0	0	1.0099
463701		0	0	0	0	0.004	0	0	0	0	0	0	0	0	0	0	0	0	0	0	0	0	0	0	0	0	0	0	0	0	0	0
526723		0	0	0	0	0.004	0	0	0	0	0	0	0	0	0	0	0	0	0	0	0	0	0	0	0	0	0	0	0	0	0	0
47126		0	0	0	2	0	0	0	0	0.188771	0	0	0	0	0	0	0	0	1.76116	0	0.0392157	0	0	0.0486797	0	0	0.286483	0	0	0	0	0
748271		0	0.004	0	0	0	0	0	0.00395257	0	0	0	0	0	0	0	0	0	0	0	0	0	0.004	0	0	0	0	0	0.00795257	0	0	0
6561		0	0	0	0	0	0	0	0	0	0	0	0	0	0	0	0	0	0	0	0	0	0	0	0	0	0.0135135	0	0	0	0	0
45098		0	0	0	0	0	1	0	0	0	0	0	0	0	0	0	0	0	0	0	0	0	0	0	0	0	0	0	0	0	0	0
977779		0.25	0	0	1.25	0	0	0	0	15	1.48596	0	0	0	0	0	0	0	5.66346	0	1	0	0	7.25	0	0	19.224	0.132479	0	0	0.727941	4
231409		0	0	0	0	0	0	0	0	0	0	0	0	0	0	0	0	0	0	0	0	0	0	0	0	0	1	0	0	0	0	0
135615		3.83333	0	3	3	14	0	1	0	0	1.5	0	4	0	0	0	2	0.333333	0	0	0	0	0	0	0	0	0	0	0	3	1	0
413017		0	0	0	0	0	0	0	0	0.949739	0	0	0	0	0.631579	0	0	0	11.967	0	0.622391	0	0	3.24393	0	0	1.95317	0	0	0	0	0
229290		0	0	0	1	0	0	1.33333	0	2	0	4	0	0	0	0	0	0	9	0	0	0	0	0	19.0185	0	3	0	0	0	0	0
151659		1294.25	6.42564	20.3519	51.9007	514.905	19.3333	69.4276	12.4582	0	67.7423	1.616	4672.75	772.555	0	0	44.8778	2607.13	0	0	0	0	4.59318	0	1.57499	20.3333	0.5	29.3929	2.57381	21.5	57.7179	0
860079		0	0	0	0	0.004	0	0	0	0	0	0	0	0	0	0	0	0	0	0	0	0	0	0	0	0	0	0	0	0	0	0
227979		0	0	0	0	0	0	0	0.008	0	0	0	0	0	0	0	0	0	0	0	0	0	0	0	0	0	0	0	0	0	0	0
217775		0	0	0	0	0	0	1	0	0	0	0	0	0	0	0	0	0	0	0	0	0	0	0	0	2	0	0	0	0	0	0
1177		1	0	0	1.5	14.4242	0	9	0	0	1	0	15.5	6	0	0	1	7.33333	0	0	0	0	2	0	0	3	0	0	2	2	0	0
1189		0	0	0	0	0	0	1	0	0	0	0	0	0	0	0	0	1.75	0	0	0	0	0	0	0	0	0	0	0	0	0	0
134629		0	0	0	0	0	0	0	0	0	0	1	0	0	0	0	0	0	0	0	0	0	0	0	0	0	0	0	0	0	0	0
269071		0	0.333333	0	0	0	0	0	0	0	0	0	0	0	0	0	0	0	0	0	0	0	0	0	0	0	0	0	0	0	0	0
32021		0	0	0.142857	0	0.2	0	0	0	0	0	0	6.21111	0.25	0	0	0	1.50992	0	0	0	0	0	0	0	0.25	0	0	0	5.72778	0	0
134615		0	0	0	0	0	0	0	0	0	0.333333	0	0	0	0	0	0	0	0	0	0	0	0	0	0	0	0	0	0	0	1.5	0
981060		0	0	0	0	0	0	0	0	0	0	0	0	0	0	0	0	0	0	0	0	0	0	0	0	0	0.004	0	0	0	0	0
71419		0	0	0	0	0	0	0	0	0.5	0	0	0	0	0	0	0	0	0	0	0	0	0	0	0	0	0	0	0	0	1	0
1091316		0	0	0	0	0	0	0	0	0	0	0	0	0	0	0	0	1	0	0	0	0	0	0	0	0	0	0	0	0	0	0
385		0	0	0	0	0	0	0	0	0	0	0	1	0	0	0	0	0	0	0	0	0	0	0	0	0	0	0	0	0	0	0
411020		0	0	0	0	0	0	0	0	0	0.0285714	0	0	0	0	0	0	0	0	0	0	0	0	0	0	0	0	0	0	0	0.025641	0
29581		0	1.02069	1.66667	0	0	0	0	3.14022	0	0	1	0	0	0	0	0	0	0	0	0	0	0.0202373	0	1.008	0	0	0	0.0162373	0	0	0
216260		0	0	0	0	0	0	0	0	0.25	0	0	0	0	0	0	0	0	0	0	0	0	0	0	0	0	0	0.0042735	0	0	0	0
7213		0	0	0	0	0	0	0	0	0	0	0	0	0	0	0	0	0	0	0	0	0	3	0	0	0	0	0	1	0	0	0
508609		0	0	0	0	0	0	0.00943396	0	0	0	0	0	0	0	0	0	0	0	0	0	0	0	0	0	0	0	0	0	0	0	0
712898		1	8.76125	2	0.382078	16.2	0	0	5.17314	0	0	5.75	5	0	0	0	1	1.5	0	0	0	0	1	0	3.50592	1	0	1	12.0052	12.8333	1	0
84347		0	0	0	0	0	0	0	0	0	0	0	0	0	0	0	0	0	0.0505051	0	0	0	0	0	0	0	0	0	0	0	0	0
864010		0	0	0	0	0	0	0	0	0	0.00389105	0	0	0	0	0	0	0	0.00505051	0	0	0	0	0	0	0	0	0	0	0	0	0
7520		0	0	0	0	0	0	0	0	0	0	0	0.333333	1	0	0	0	0	0	0	0	0	0	0	0	0	0	0	0	0	0	0
37411		0	0	0	0	0	0	0	0	0	0	0	0	0	0	0	0	0	0	0	0	0	0	0	0	0	0	0	0	0	0.25	0
439843		0.027027	1.34621	0.04	0.0654327	9.9984	0	0.125	5.49045	0	0	0.730908	0	0	0	0	2.10442	0	0	0	0	0	2.15204	0	1.7812	2.01299	0	0.0434783	0.734441	1.13841	0	0
269252		0	0	0	0	0	0	0	0	0	0	0	0	0	0	0	0	0	0	0	0	0	0	0	0	0	0	0	0	4	0	0
698384		0	0	0	0	2	0	0	0	0	0	0	0	0	0	0	0	1	0	0	0	0	0	0	0	0	0	0	0	0	0	0
158424		0	0	0	0	0	1	0	0	0	0	0	0	0	0	0	0	0	0	0	0	0	0	0	0	0	0	0	0	0	0	0
87862		0	0	0	0	0	0	0	0	5.09412	0	0	0	0	1.0542	0	0	0	0.509901	0	3.0271	0	0	19.6954	0	0	1.07657	0	0	0	0	0.00990099
46746		0	0	0	0	0	1	0	0	0	0	0	0	0	0	0	0	0	0	0	0	0	0	0	0	0	0	0	0	0	0	0
37526		0	0	0	0	0	0	0	0	0	0	0	0	0	0	0	0	0	0	0	0	0	0	0	0	0	0	0	0	0	1	0
585303		0	0	0	0	0	0	0	0	0	0	0	0	0	0	0	0	0.004	0	0	0	0	0	0	0	0	0	0	0	0	0	0
621		0.5	0.867451	0.421931	0.0367096	3.90846	0	0.114286	1.99606	0	0.0298507	1	0.5	0	0	0	0	0.618182	0	0	0.0714286	0	0.0514909	0	1.08408	0.105053	0	0	1.17822	2.16519	0.0689655	0
481649		0	0	0	0	0	0	0	0	0.119361	0	0	0	0	0	0	0	0	0	0	0	0	0	0.0266127	0	0	0.00568182	0	0	0	0	0
63186		17.6429	0	97.5	1	15	0	3	0	0	2	0	141.5	15.3095	0	0	1	32.5	0	0	0	0	0	0	0	32.5	0	1	0	13.5	0	0
245741		0	0	0	0	0	0	0	0	0	0	0	0	0	0	0	0	0	0	0	0	0	0	0	0	0	0	0	0	0	0	0.333333
155892		3.84848	0	30.8333	5.66667	118.733	2	8	0	0	0.4	2	0	0.666667	0	0	3.33333	8.66667	0	0	0	0	0.666667	0	0.666667	34.3333	0	1.4	1	15.5	2.45833	0
329448		0	0	0	0	0	0	0	0	0	0	0	0	0	0	0	0	0	0.008	0	0	0	0	0	0	0	0	0	0	0	0	0
3052		3.325	0	0	2	10	1	1	0	0	4	0	3	0	1	0	0	11.2748	0	0	0	0	0	0	0	5.33333	0	2	0	4.5	0	0
414684		3	2.16667	3	16	253.987	3.25	14.3333	2	0	6	0.5	7.5	1	0	0	16.5	10.1667	0	0	0	0	2	0	0.5	42.3333	0	9	0	26.5	6.5	0
1074889		2	0	3	0	3.75	0	0	0	0	0	0	12.25	1.5	0	0	0	6.33333	0	0	0	0	0	0	0	0.5	0	0	0	0.5	0	0
3246		1	0	0	3.07692	4	0	5	0	0	0	0	2	0	0	0	0	1	0	0	0	0	0	0	0	0	0	2	0	1	1	0
31317		2	0	0	0	0	0	0	0	0	0	0	0	0	0	0	0	1	0	0	0	0	0	0	0	0	0	0	0	0	0	0
129927		0	0	0	0	0	0	0	0	0	0	0	0	0	0	0	0	0	0	0	0	0	0	0	0.148413	0	0	0	0	0	0	0
186624		24.7238	1	7	248.775	65.0333	100.754	281.859	57.6667	1050.38	226.44	3757.62	10	0	5351.95	8142.95	37.1324	24.4351	1809.26	2	11320.6	15	519.196	8023.48	5819.1	4.5	1049.81	121.753	1	4.33333	117.833	5.174
911092		0	0	0	0	2.11111	0	1	0	0	0	0	10.3333	0.5	0	0	0	2	0	0	0	0	0	4	0	2.5	0	0	0.015544	1	0	0
1097443		0	0	0	0	0	0	0	0	0	0	0	0	1	0	0	0	0	0	0	0	0	0	0	0	0	0	0	0	0	0	0
64895		1	0	0	0	9	0	0	0	0	0	0	14.9333	0.428571	0	0	0.4	8	0	0	0	0	0	0	0	2	0	0	0	3.5	1	0
395494		2	1.3138	4	23.3333	32.5	9.5	13.8333	5.33717	0	5	1.27786	8.1	0	0	0	0.75	0	0	0	0	0	3.32402	0	1.61339	4.5	0	4.66667	1.41686	3.25	13.6667	0
314343		0	2.3148	1	38.6429	76.75	9.5	22.9167	5.47368	0	11	1.07413	8.55	0.5	0	0	1.5	2.33333	0	0	0	0	4.10801	0	5.21696	4	0	12.2833	5.40035	7.53333	8.05556	0
1311		1	0	1	0	0	0	0	0	0	0	0	2.6	0	0	0	0	4	0	0	0	0	0	0	0	1	0	0	0	0.6	0	0
304850		0	0	0	0	0	0	0	0	0	0	0	0	0	0	0	0	0	0.016	0	0	0	0	0	0	0	0	0	0	0	0	0
146825		0	0	0	0	2	0	0	0	0	0	0	0	0	0	0	0	0	0	0	0	0	0	0	0	0	0	0	0	0	0	0
542457		1.03226	0	0	0	2	2	0	0	0	0	0	6.09091	0.481818	0	0	0	3	0	0	0	0	0	0	0	0	0	0	0	0	0	0
74819		0	0	0	0	0	0	0	0	0	0	0	0	0	0	0	0	0	0	0	0	0	0	0	0	0	0	1.5	0	0	0	0
227086		0	0	0	0	0	0	0	0	0	0	0	0	0	0	0	0	0.027027	0	0	0	0	0	0	0	0	0	0	0	0	0	0
1054917		0	0	0	0	0	0	0	0	0	0	0.004	0	0	0	0	0	0	0	0	0	0	0	0	0	0	0	0	0	0	0	0
77206		0	0	0	0	1.16667	0	0	0	0	0	0	0	0	0	0	0.333333	0	0	0	0	0	0	0	0	0	0	0	0	0	0	0
1080188		0	0	0	0	0	0	0	0	0	0	0	0	0	0	0	0	0	0	0	0	0	0.00390625	0	0	0	0	0	0.00390625	0	0	0
341502		0	0	0	0	0	0	0	0	0	0	0	0	0	0	0	0	0	0	0	0	0	0	0	0	0	0	0	0.00657895	0	0	0
167885		0	0	0	0	0	0	0	0	0	0	0	0	0	0	0	0	0	0.024	0	0	0	0	0	0	0	0	0	0	0	0	0
415440		25	0	0	0	1	0	0	0	0	1	0	35	5	0	0	0	10	0	0	0	0	0	0	0	0	0	0	0	0	0	0
114848		0	0	0	0	0	0	0	0	0	0	0	0	0	0	0	0	0	0	0	0	0	0	0	0	0	1	0	0	0	0	0
757425		0	0	0.142857	0	1.2	0	0	0	0	0	0	0.822222	0	0	0	0	1.13492	0	0	0	0	0	0	0	0	0	0	0	1.76032	0	0
1089333		0	0	0	0	0.004	0	0	0	0	0	0	0.00925926	0	0	0	0	0	0	0	0	0.004	0	0	0	0	0	0	0	0	0	0
61645		1.66667	13.7855	2	4.00708	17	4	6.75	21.7917	0	1.5	21.3373	2.2	0	0	0	1	3	0	0	0	0	6.00391	0	2.23591	2.33333	0	3	8.54156	7.75	3	0
216328		0	0	0	0	0	0	0	0	0	0	0	0	0	0	0	0	0	0	0	0	0	0	0	0	0	0.012	0	0	0	0	0
655051		0	0	0	0	0	0	0	0	1	0	0	0	0	0	0	0	0	1	0	0	0	0	1	0	0	0	0	0	0	0	0
3877		0.2	0	2	2	2.5	1.5	3.5	1	4.2469	0	0	8.26667	0	1.16531	0	0	9.57576	3.67657	2	0.349323	0	0	11.8565	0	0	0.234901	2.66667	0	1	5.5	1.0099
397538		0	0	0	0	0	0	0	0	0	0	0	0	0	0	0	0	0	0.00505051	0	0	0	0	0	0	0	0	0	0	0	0	0
31782		0	0	0	0	0.004	0	0	0	0	0	0	0	0	0	0	0	0	0	0	0	0	0	0	0	0	0	0	0	0	0	0
332248		1	0	0	16.3333	11.5	2	11.5	1	0	2	0	3	0	0	0	0	9.5	0	0	0	0	0	0	0	4	0	3	0	0	3	0
284720		0	0	0	0	0	0	0	0	0	0	0	0	0	0	0	0	0	0	0	0	0	0.5	0	0	0	0	0	0	0	0	0
106499		1	0	0	0	0	0	0	0	0	0	0	0	0	0	0	0	0	0	0	0	0	0	0	0	0	0	0	0	0	0	0
37433		0	0	0	0	0	0	0	0	0	0.00389105	0	0	0	0	0	0	0	0	0	0	0	0	0	0	0	0	0	0	0	0	0
544448		22.3667	0.019469	2	0.0226537	38.1667	0	3	0.25	0	0	2.4	84.5627	10.3333	0	0	3.26667	57.4962	0	9.7	0	9.4	1.324	0	0	2.88889	0	0.333333	0.008	15.7222	0	0
695560		1	0	0	0	0	0	0	0	0	0	0	2.33333	0	0	0	0	0.333333	0	0	0	0	0	0	0	0	0	0	0	0	0	0
203864		0	0	0	0	0	0	0	0	0	0	0	0.333333	0	0	0	0	1	0	0	0	0.25	0	0	0	0	0	0	0	0	0	0
455602		0	0	0	0	0	0	0	0	0	0	0	3	0	0	0	0	0	0	0	0	0	0	0	0	0	0	0	0	0	0	0
526662		0	0	3.5	0	2.66667	0	0	0	0	0	0	0	0	0	0	0	1	0	0	0	0	0	0	0	0	0	0	0	0	0	0
114420		0	0	0	0	0	0	0	0	0.118717	0	0	0	0	0.0789474	0	0	0	2.81214	0	0.117015	0	0	0.450946	0	0	0.466236	0	0	0	0	0
80966		0	0	0	1	0	0	0	0	0	0	0	0	0	0	0	0	0	0	0	0	0	0	0	0	0	0	0	0	0	0	0
224379		1.08333	1	13	11	175.732	4	17.8333	2	0	9	1	15.5833	4	0	0	8.53571	11	0	0	0	0	1	0	1	24	0	1.83333	0	48.7	7	0
366141		0	0	0	0	0	0	0	0	0	0	0	0	0	0	0	0	0	0	0	0	0	0	0	0	0	1	0	0	0	0	0
230569		0	0	0	0	0	0	0	0	0	0	0	0	0	0	0	0	1.69231	0	0	0	0	0	0	0	0	0	0	0	0	0	0
80863		0	0	0	2.11538	0	0	0	0	2	0	0	0	0	2.44167	0.375	0	0	3.5	0	0	0	0	0.5	0	0	1	0	0	0	0	0
114958		0	0	0	0	0	0	0	0	0	0	0	0	0	0	0	0	0	0	0	0	0	0	0.666667	0	0	0	0	0	0	0	0
1512		0	0	0	0	0	0	0	0	0	0	0	0	0	0	0	0	0	0	0	0	0	0	0	0	0	0	0	0	1	0	0
221498		0	0	0	0	0	0	0	0	0.0395725	0	0	0	0	0.0263158	0	0	0	1.80177	0	0.0455408	0	0	0.180618	0	0	0.290726	0	0	0	0	0
194327		0.0434783	0	0	0	0	0	0	0	0	0	0	0	0	0	0	0	0	0	0	0	0	0	0	0	0	0	0	0	0	0	0
946878		0	0	0	0	0	0	0	0.004	0	0	0	0	0	0	0	0	0	0	0	0	0	0	0	0.00675676	0	0	0	0	0	0	0
761545		0	0	0	0	0	0	0	0.0625	0	0	0	0	0	0	0	0	0	0	0	0	0	0	0	0	0	0	0	0	0	0	0
10678		0	0	0.015625	0	0	0	0	0.0133492	0	0	0	0	0	0	0	0	0	0	0	0	0	1.5	0	0	0.0129032	0	0	0	0	0	0
103886		0	0	0	0	0	0	0	0	0	0	0	0	0	0	0	0	0	0	0	0	0	0.00398406	0	0	0	0	0	0	0	0	0
6682		0	0	0	5.25	0	2.33333	10.5	0	55.5367	8.75	0	0	0	2.68272	0	0	0	13.1807	0	14.1023	0	0	117.051	0	0	20.5174	8	0	2	1.66667	1.36617
49928		4	1.30367	4.46531	0	29.5	0	0.0649371	2.64288	0	0.904	0.161153	18.0198	4	0	0	16	1.34971	0	0	0	0	1.35082	0	1.13411	0.153846	0	0	1.35353	0	0	0
1223		0	0	1	0	1	0	0	0	0	0	0	0	0	0	0	0	0	0	0	0	0	0	0	0	0	0	0	0	0	0	0
387343		0	0	0	0	2	0	0	0	0	0	0	2	0	0	0	0	1	0	0	0	0	0	0	0	0	0	0	0	1	0	0
526227		0	0	1	5	4.66667	2	5.5	0	0	3	0	2	0	0	0	0	2	0	0	0	0	1	0	0	0	0	1	0.5	2	4	0
78388		0	0	0	0	0	0	1	0	0	1	0	0	0	0	0	0	0	0	0	0	0	0	0	0	0	0	1	0	0	0	0
156152		0	0	0	1	0	0	0	0	0	1	0	1	1	0	0	0	0	0	0	0	0	0	0	0	0	0	2	0	0	0	0
274692		0	0	0	0	0	0	0	0	0	0	2	0	0	0	0	0	0	0	0	0	0	1	0.25	11.1333	0	0	0	0	0	0	0
7711		75.481	71.5727	14.5995	809.194	298.677	336.949	965.345	174.138	1421.9	706.709	3899.06	50.5452	9.88718	5430.87	8169.15	99.6905	127.84	1958.38	29.5	11404.2	32.439	616.879	8940.1	5919.04	14.647	1249.65	410.661	105.563	23.9384	397.615	30.0202
630		1	17.4422	0.75	0.0151668	24.6587	0	2	10.3638	0	2	5.0614	9.6	0	0	0	2.14286	3.66667	0	0	0	0	5.59271	0	2.12144	7.5	0	0	16.2342	5.51449	2	0
116166		0	0	0	1	0	0	0	0	0.166667	2	0	0	0	1	0	0	0	0	0	0	0	0	1.33333	0	0	0	0	0	0	0	0
9605		18.6286	56.6532	3.02633	33.8493	42.2675	17.0295	30.0122	92.2049	8.73204	18.2949	32.3111	2.21429	0	23.9665	25.2	3.57143	49.4643	6.84323	10.6667	16.8346	2.625	39.0226	39.2145	22.9692	2.1129	10.7235	8.47073	72.4568	1.51087	11.5108	1.0099
444235		0	0	0	0	0	0	0.00943396	0	0	0	0	0	0	0	0	0	0	0	0	0	0	0	0	0	0	0	0	0	0	0	0
30095		0	0	0	0	0	0	0	0	0	0	0	0	0	0	0	0	0	0	0	0	0	0	0	0	0	0	1	0	0	0	0
557604		0	0	0	0	0	0	0	0	0	1	0	0	0	0	0	0	0	0	0	0	0	0	0	0	0	0	0	0	0	1	0
526722		0	0	0	0	0.004	0	0	0	0	0	0	0	0	0	0	0	0	0	0	0	0	0	0	0	0	0	0	0	0	0	0
329380		131.5	0	0	12	6.33333	6	14.5	0	0	3	0	7	0	0	0	0	1478.24	0	0	0	0	0	0	0	0	0	15	0	0	1	0
311994		0	0	0	0	1.33333	0	0	0	0	0	0	0	0	0	0	0	0	0	0	0	0	0	0	0	0	0	0	0	0	0	0
740973		0	0	0	0	0	0	0	0	0	0	0	0	0	0	0	0	0	0	0	0	0	0	0	0	0.1	0	0	0	0	0	0
419580		0	0	0	0	0	0	0	0.00204499	0	0	0	0	0	0	0	0	0	0	0	0	0	0	0	0	0	0	0	0	0	0	0
1032421		0	0	0	0	0.004	0	0	0	0	0	0	0	0	0	0	0	0	0	0	0	0.004	0	0	0	0	0	0	0	0	0	0
37584		0	0	0	0	0	0	0	0	0	0.5	0	0	0	0	0	0	0	0	0	0	0	0	0	0	0	0	0	0	0	0	0
1054204		0	0	0	0	0	0	0	0	0	0	0.004	0	0	0	0	0	0	0	0	0	0	0	0	0	0	0	0	0	0	0	0
32025		0	0	1	0	0	0	0	0	0	0	0	0	0	0	0	0	1.5	0	0	0	0	0	0	0	0	0	0	0	5	0	0
434270		0.333333	0.838501	0	0.375	1.12302	1.5	0.25	0.351516	0	0	0	0.666667	0	0	0	0.142857	0.333333	0	0	0	0	0.00651466	0	0.005923	2.08333	0	0	0.0181691	1.41667	0	0
34064		20.6888	0	7.5	2.69697	22.3992	1.8125	2.77778	0	0	1.91667	2	91.119	11.3188	0	0	0	53.5542	0	0	0	0	0	0	0	3.9	0	0	0	29.6	0.909091	0
8494		0	0	0	2	0	1	0	0	0	3	0	0	0	0	0	0	0	0	0	0	0	0	0	0	0	0	0	0	0	1	0
1188		0	0	0	0	0	0	0	0	0	0	0	0	0	0	0	0	0	0	0	0	0	0	0	0	0	0	0	0	1	0	0
3142		0	0	0	0	0	0	0	0	0	0	0	0.333333	0	0	0	0	4	0	0	0	0	0	0	0	0	0	0	0	0	0	0
541705		0	0	0	0	0	0	0	0	0	0	0	0	0	0	0	0	0	0	0	0	0	0	0	0.00675676	0	0	0	0.01	0	0	0
590998		1.33333	0	4	1	6	0	1	0	0	0	0.5	4.4	0	0	0	0	4.06667	0	0	0	0	0	0	0.5	0.333333	0	1.5	0	0.5	1	0
884607		0	0	0	0	0	0	0	0	0	0	0	0	0	0	0	0	0	0	0	0	0	1	0	0	0	0	0	0	0	0	0
84567		15.2	0	14.5	0	5.25	0	2.16667	11	0	1	0	65.7	10.5	0	0	0	16	0	0	0	0	0	0	0	25.8333	0	0	0	50.1667	1	0
282425		0	0	0	0.666667	0	0	2.66667	0	1.98556	0	0	0	0	1.57541	0	0	0	0.258386	0	0.390738	0	1.5	13.1168	0	0	1.06407	0	0	0	0.444444	1.10081
743642		0	0	0	0	0	0	0	0	0	0	0	0.5	0	0	0	0	1.5	0	0	0	0	0	0	0	0	0	0	0	0	0	0
417093		0	0	0	0	0	0	0	0	0	0	0	0	0.672932	0	0	0	0	0	0	0	0	0	0	0	0	0	0	0	0	0	0
205957		0	0	0	0	3.5	2	0	0	0.75	0	0	0	0	0	0	0	0	0	0	0	0	0	0	0	0	0	0	0	0	0	0
210329		0	0	0	0	0	0	0	0	0	0	0	0	0	0	0	0	0	0	0	0	0	0	0	0	0	0	0	0	0	0	0
912910		0	0.004	0	0	0	0	0	0.004	0	0	0	0	0	0	0	0	0	0	0	0	0	0	0	0.00675676	0	0	0	0	0	0	0
455587		0	0	0	0	0	0	0	0	0	0	0	2.33333	2	0	0	0	0	0	0	0	0	0	0	0	0	0	0	0	0	0	0
420616		0	0	0	0	0	0	0	0	0	0	0	0	0	0	0	0	2	0	0	0	0	0	0	0	0	0	0	0	0	0	0
206163		0	0	0	0	0	0	0	0	0	0	0	0	0	0	0	0	0	0	0	0	0	0	0	0.004	0	0	0	0	0	0	0
188143		0	0	0.147619	0	0	0	0	0	0	0	0	0	0	0	0	0	0	0	0	0	0	0	0	0	0	0	0	0	2	0	0
542475		0	0	0	0	0	0	0	0	0	0	0	0	0	0	0	0	3	0	0	0	0	0	0	0	0	0	0	0	0	0	0
182690		0	0.166667	0	0	0	0	0	2.07143	0	0	0	0	0	0	0	0	0	0	0	0	0	0.00458716	0	0.00478469	0	0	0	0.00515464	0	0	0
405585		0	0	0	0	0	0	0	0	0	0	0	0	0	0	0	0	0	0	0	0	0	0	0	0	0	0	0	0	1	0	0
266706		0	0	0	0	0	0	0	0	0	0	0	0	0	0	0	0	0.004	0	0	0	0	0	0	0	0	0	0	0	0	0	0
659948		0	0	0	0	0	0	0	0	0	0	0	0	0	0	0	0	0	0	0	0	0	0	0	0	0	0	0	0	0	0	0
41799		0	0	0	0	0	0	0	0	0	0	0	0	0	0	0	0	0	0.004	0	0	0	0	0.004	0	0	0.0135135	0	0	0	0	0
324869		0	0	0	0	0	0	1	0	0	0	0	0	0	0	0	0	0	0	0	0	0	0	0	0	0	0	0	0.5	0	0	0
1093138		0	0	0	0	0	0	0	0.00390625	0	0	0	0	0	0	0	0	0	0	0	0	0	0.004	0	0	0	0	0	0	0	0	0
91891		3.18968	0.00775194	0	1.2	8.15873	0	3	0.0429426	0	0.666667	0	10.0726	2.04878	0	0	0.666667	7.87778	0	0	0	0	0	0	0	0.944444	0	0	0.00775194	1.24444	0.707692	0
84999		3	0	1	6	20.5	1	2.5	1	0	0	0.5	7.07143	2.5	0	0	3	9.18254	0	0	0	1	0	0	0	4.5	0	0	0.333333	1.2	1	0
112177		0	0	0	0	0	0	0	0	0	0	0	0	0	0	0	0	0	0	0	0	0	0.00398406	0	0	0	0	0	0	0	0	0
290317		0	0	1.83333	0.00647249	4.5	0	1	0	0	0	0	0.333333	1	0	0	2	0	0	0	0	0	0	0	0	1	0	0.666667	0	3.5	0	0
184609		0	0	0	0	0	0	0	0	0	0	0	1	1	0	0	0	0	0	0	0	0	0	0	0	0	0	0	0	0	0	0
1094419		0	0	0	0	0.004	0	0	0	0	0	0.004	0	0	0	0	0	0	0	0	0	0.004	0	0	0	0	0	0	0	0	0	0
1047156		0	0	0	0	0	0	0	0	0	0	0.004	0	0	0	0	0	0	0	0	0	0	0	0	0	0	0	0	0	0	0	0
141969		0	0	0	0	0	0	0	0	0	0	0	0	0	0	0	0	0	0	0	0	0	0	0	0	0	0	0.0042735	0	0	0	0
1005880		0	0	0	0	0	0	0	0.00371747	0	0	0	0	0	0	0	0	0	0	0	0	0	0.00371747	0	0	0	0	0	0	0	0	0
72034		0	0	0	2.33333	1	1	1.5	0	33.0959	3.96364	0	1.5	0	5.13717	0	0	1.5	19.763	0	6.2813	0	0	97.5518	0	0	10.863	0.333333	0	1	2	2.7797
127533		0	0	0	0	0	0	0	0	0	0	0	0	0	0	0	0	0	0.016	0	0	0	0	0	0	0	0	0	0	0	0	0
981100		1.5	0	0	1	1	0	0.666667	0.00204499	0	0	0	0	0	0	0	0	0	0	0	0	0	0	0	0	0	0	0	0	0	0	0
764298		1	0	0	0	0	0	0	0	0	0	0	0	0	0	0	0	0	0	0	0	0	0	0	0	0	0	0	0	0	0	0
999364		0	0.0588235	0	0	0	0	0	0	0	0	0.0285714	0	0	0	0	0	0	0	0	0	0	0	0	0.0294118	0	0	0	0	0	0	0
52022		0	0	1	5	4.66667	2	5.5	0	0	3	0	2	0	0	0	0	2	0	0	0	0	1	0	0	0	0	1	0.5	2	4	0
48075		0	0	0	0	3	0	0	0	0	0	0	0	0	0	0	0	0	0	0	0	0	0	0	0	0	0	0	0	1	0	0
742052		0	0	0	0	0.857143	0	0	0	0	0	0	0	0	0	0	1	0	0	0	0	0	0	0	0	0	0	0	0	0	0	0
122240		0	0	0	0	0	0	0	0	0	0.0153846	0	0	0	0	0	0	0	0	0	0	0	0	0	0	0	0	0.0042735	0	0	0.0303309	0
29341		0	0	0	0	0	0	0	0	0	0	0	1	0	0	0	0	0	0	0	0	0	0	0	0	0	0	0	0	0	0	0
88026		0	0	0	3	0	0	0	0	0	0	0	0	0	0	0	0	0	0	0	0	0	0	0	0	0	0	0	0	0	0	0
390824		0	0	0	0	0	0	0	0	0.0530012	0	0	0	0	0	0	0	0	0.745124	0	0.0196078	0	0	0	0	0	0.137613	0	0	0	0	0
429009		0	0	0	0.00202225	18	0	0	0	0	0	0	1.5	0	0	0	0	0	0	0	0	0	0	0	0	1.25	0	0	0	0	0	0
289380		1.58333	0	0	0	1	0	0	0	0	0	0	4.91667	1.11111	0	0	0.25	3.35	0	0	0	0	0	0	0	0	0	0	0	1.33333	0	0
28049		0	0	0	0.5	7.33333	0	0	0	0	2	0	2.16667	0	0	0	0	3.83333	0	0	0	0	0	0	0	0	0	0	0	0.5	1	0
30982		0	0	0	0	0	0	0	7	0	0	0	0	0	0	0	0	0	0	0	0	0	0	0	14.0175	0	0	0	0	0	0	0
245094		0	0	0	0	0	0	0	0	0	0	0	0	0	0	0	0	0	0	0	0	0	0	0	1	0	0	0	0	0	0	0
3561		0	0	0	0	1	0	0	0	0	0	0	0	0	0	0	0.5	0	0	0	0	0	0	0	0	0	0	0	0	0	0	0
83561		1	0	0	0	20.3333	0	3	0	0	0	0	0	2	0	0	5	3	0	0	0	0	0	0	0	0.625	0	0	0	0	0	0
373073		0	0	0	0	0	0	0	0	0	0	0	0	0	0	0	0	1	0	0	0	0	0	0	0	0	0	0	0	0	0	0
639607		0	0	0	0	0	0	0	0	0	0	0	0	0	0	0	0	0	0	0	0	0	0	0	0	0	0	1	0	0	0	0
7001		0	0	0	0	1	0	0	0	16.687	1	0	0	0.333333	5.8663	0	0	0	4.08647	0	1.12087	0	0	22.972	0	0	3.78647	0	0	0	0	0.019802
61336		0	0	0	0	0	0	0	0	1.08333	0.00389105	0	0	0	0	0	0	0	0	0	0	0	0	0	0	0	0	0	0	0	0	0
686251		0	0	0	0	0	0	0	0	0	0	0	0	0	0	0	0	0	0	0	0	0	0	0	0	0	0	0	0	0	1	0
379378		0.5	0	0	0	0	0	1	0	0	0	0	0	0	0	0	0	2	0	0	0	0	0	0	0	0	0	0	0	0	0	0
93759		0	0	0	0	0	0	0	0.04	0	0	0	0	0	0	0	0	0	0	0	0	0	0	0	0	2	0	0	0.0434783	0	0	0
478593		0	0	0	0	0	0	0	0	0	0.0192757	0	0	0	0	0	0	0	0.00505051	0	0	0	0	0	0	0	0	0.0042735	0	0	0.0303309	0
528300		0	0	0	0	0	0	0	0	0	0	0	0	0	0	0	0	0	0	0	0	0	0	0	0	0	0	0	0	0	0	0
79885		0	7.00619	0	0	3	0	0	13.7924	0	0	4	2	0	0	0	0	4.5	0	0	0	0	4.08929	0	1	2	0	1	1.32794	2	0	0
85789		0	0	0	1.26667	1.57619	0.111111	1.00556	0	0	0.383333	0	0	0	0	0	0	0	0	0	0	0	0	0	0	0	0	0	0	0	0.5	0
907806		0	0	0	0	0	0	0	0	0	0	0	1	0	0	0	0	0	0	0	0	0	0	0	0	0	0	0	0	0	0	0
213118		9.5	3.5	37	12.3366	318.367	5.5	7.5	4	0	7.16667	0	11.9048	1	0	0	19.7778	39.5333	0	0	0	0	2.5	0	0.5	56.8333	0	8	1	402.222	7.5	0
608538		0	0	0	0	1	0	0	0	0	0	0	1	1	0	0	0	4	0	0	0	0	0	0	0	0	0	0	0	0	0	0
106279		0	0	0	0	0	0	0	0	0.00699301	0	0	0	0	0	0	0	0	0.231485	0	0	0	0	0.0454545	0	0	0.179842	0	0	0	0	0
34509		0	0	0	0	0	0.5	0.5	0	0	0	0	0	0	0	0	0	0	0	0	0	0	0	0	0	0	0	0	0	0	0	0
317032		0	0	0	0	0	0	0	0	0	0	0	0	0	0	0	0	0	0	0	0	0	0	0	0.839051	0	0	0	0	0	0	0
117565		0	0	0	1.5	0	0	1	0	0	1	0	0	0	0	0	0	0	0	0	0	0	0	0	0.0111111	0	0.5	0	0	0	1	0.5
368486		0	0	0	0	0	0	0	0	0	0	0	0	0	0	0	0	0.0666667	0	0	0	0	0	0	0	0	0	0	0	0	0	0
981170		0	0	0	0	0	0	0	0.00371747	0	0	0	0	0	0	0	0	0	0	0	0	0	0.00371747	0	0.004	0	0	0	0	0	0	0
963		1.25	12854.8	10	13.3333	63.6111	4	21.5	10030.2	0	5.66667	11358.1	4	0	0	0	2	3.5	0	0	0	8	9661.01	0	7423.62	5	0	5.64286	13500.6	8.16667	8	0
89954		0	0	0	0	0	0	0	0	0	0	0	0	0	0	0	0	1	0	0	0	0	0	0	0	0	0	0	0	0	0	0
57862		0	0	0	0	0	0	0	0	0	0	0	0	0	0	0	0	0	0	0	0	0	0	0	0.00404858	0	0	0	0	0	0	0
481672		0	0	0	0	0	0	0	0	0.313832	0	0	0	0	0	0	0	0	0.0382993	0	0.0123457	0	0	0.0533362	0	0	0.125674	0	0	0	0	0
273030		0	0	0	0	0	0	0	0	0.020979	0	0	0	0	0	0	0	0	0.0530505	0	0	0	0	0	0	0	0	0	0	0	0	0
272568		0	0	2.5	5.02913	89.781	1	9	1	0	4.5	7	1	1	0	0	1.33333	0.9	0	0	0	0	4	0	3	11	0	3.33333	2.33333	14.6667	2.33333	0
301535		0	0	0	0	0.004	0	0	0	0	0	0	0.00925926	0	0	0	0	0	0	0	0	0	0	0	0	0	0	0	0	0	0	0
424751		0	0	0	0	0	0	0	0	0	0	0	0	0	0	0	0	0.428571	0	0	0	0	0	0	0	0	0	0	0	0	0	0
6340		0	0	0	18.7778	1	7.06667	15.3333	0	26.0309	14.6516	0	1	0	29.049	8	1	3.2	30.1545	0	10.0136	0	0.00398406	79.237	0	0	22.4129	12.297	0	0	15.6213	4.89323
360425		0	0	1	0	0	0	0	0	0	0	0	0	0	0	0	0	0	0	0	0	0	0	0	0	1	0	0	0	0	0	0
52443		0	0	0	0	1	0	0	0	0	0	0	0	0	0	0	0	0	0	0	0	0	0	0	0	0	0	0	0	1	0	0
458498		0	0	0	18	0	2	15.6667	0	0	7	0	0	0	0	0	0	2	0	0	0	0	0	0	0	0	0	1	0	0	4.66667	0
423212		1.26825	0.502584	0	0.3	3.06468	0.333333	0.5	0.511382	0	0	0	6.30714	0.0121951	0	0	0.166667	2.38373	0	0	0	0	0	0	0	0.611111	0	0	0.00258398	0.111111	0.176923	0
1596		0	0	0	0	0	0	0	0	0	0	0	4.16667	0	0	0	0	0.5	0	0	0	0	0	0	0	0	0	0	0	0	0	0
359701		0	0.00769231	0	0	0	0	0	0.284069	0	0	0	0	0	0	0	0	0	0	0	0	0	0.0804604	0	0.0332719	0	0	0	0.163362	0	0	0
573741		0	0.00396825	0	0	0	0	0	0	0	0	0	0	0	0	0	0	0	0	0	0	0	0	0	0	0	0	0	0	0	0	0
498211		2	0	11	6	181.75	0.5	9	1	0	8	1	23.9	1	0	0	4.97619	9.30882	0	0	0	0	0.5	0	0	18.8333	0	6.5	1	53.8571	4.66667	0
714962		0	0.0545931	0.153704	0.0254327	1.20401	0	0.0238095	0.726391	0	0.0918484	0.430556	0.0714286	0	0	0	0.111111	0.135288	0	0	0.0588235	0	0.0268312	0	0.0339372	0.166731	0	0	0.655583	0.291828	0.0526316	0
75377		0	0	0	0	0	0	0	0	0	0	0	0	0	0	0	0	0	0	0	0	0	0	0	2.04918	0	0	0	0	0	0	0
100379		0	0	0	0	4.33333	0	0	0	0	0	0	0	0	0	0	0	1.2	0	0	0	0	0	0	0	0	0	0	0	0	0	0
2697		0	0	0	0	13.5	1	0	0.75	0	0	0	0	0	0	0	0	1	0	0	0	0	1	0	0	4	0	0	0.0518135	0	0	0
6423		0	0	0	0	0	0	0	0	0	0	0	0	0	0	0	0	0	0.072	0	0	0	0	0	0	0	0	0	0	0	0	0
415447		1	0	0	0	1	0	0	0	0	0	0	3	0	0	0	0	2	0	0	0	0	0	0	0	1	0	0	0	0	0	0
171579		0	0	0	0	0	0	0	0	2	0	0	0	0	0	0	0	0	0	0	0	0	0	1	0	0	1	0	0	0	0	0
40903		10	0	0	0	4	0	1	0	0	0	0	87.9167	17.1667	0	0	2	10	0	0	0	0	0	0	0	1	0	0	0	0	1	0
318114		0	0	0	0	1	0	0	0	0	0	0	0	0	0	0	0	0	0	0	0	0	0	0	0	0	0	0	0	0	0	0
604570		0	0	0	0	0	0	0	0	2	0	0	0	0	0	0	0	0	0	0	0	0	0	0	0	0	0	0	0	0	0	0
151731		0	0	0	0	0	0	0	0	0	0	0	0	0	0	0	0	0	0	0	0	0	0	0	0.00976287	0	0	0	0	0	0	0
37536		0	0	0	0	0	0	0.142857	0	0	0	0	0	0	0	0	0	0	0	0	0	0	0	0	0	0	0	0	0	0	0	0
561230		0	10.5681	2	9.50708	10.5	1	1	12.711	0	1	6.5	3.83333	1	0	0	0.142857	0	0	0	0	0	2.0076	0	3.43474	0.833333	0	2	6.45901	7.05882	4	0
14101		0	0	0	0	0	0	0	0	0	0	0	0	0	0	0	0	0	0	0	0	0	0	0	0	0	0	0	0	0	0.333333	0
28154		0	0	0	0	0	0	0	0	0	0	0	0.5	0	0	0	0	0	0	0	0	0	0	0	0	0	0	0	0	0	0	0
318807		0	0	0	0	0	0	0	0	0	0	0	0	0	0	0	0	0	0	0	0	0	0	0	0	0	0	0.0042735	0	0	0	0
336306		5.36036	45.0968	4.665	7.8698	39.4788	1	2	67.4734	0	0.833333	24.8115	1.79167	0	0	0	0.0135135	0.75	0	0	0	0	18.851	0	10.0239	3.52271	0	1.5	26.9055	9.2873	5	0
5594		0	0	0	0	0	0	0	0	0	0	0	0	0	0	0	0	0	0	0	0	0	0.00398406	0	0	0	0	0	0	0	0	0
933833		0	0	0	0	0	0	0	0	0	0	0	0	0	0	0	0	0.2	0.016	0	0	0	0	0	0	0	0	0	0	0	0	0
360109		0	0	0.142857	0	0.2	0	0	0	0	0	0	6.21111	0.25	0	0	0	1.50992	0	0	0	0	0	0	0	0.25	0	0	0	5.72778	0	0
542533		0	0	0	0	0	0	0	0	0	0	0	0	0	0	0	0	0.666667	0	0	0	0	0	0	0	0	0	0	0	0	0	0
8266		0	0	0	0	0	0	0	0	0	0.5	0.0625	0	0	0	0	0	0	0	0	0	0	0	0	4.00556	0	0	0	0	0	0	0
1108310		0	0.00796825	0	0	0	0	0	0.012	0	0	0	0	0	0	0	0	0	0	0	0	0	0.004	0	0.004	0	0	0	0.004	0	0	0
302453		0	0	0	0	0	0.130435	0	0	0	0.0545455	0	0	0	0	0	0	0	0	0	0	0	0	0	0	0	0	0	0	0	0.130435	0
36119		0	0	0	0	0	0	0	0	0	0	0	0	0	0	0	0	0	0.524202	0	0	0	0	0	0	0	0	0	0	0	0	0
52959		1	0	41.1833	0	1	0	1	0	0	0	0	23.3333	1	0	0	0	0	0	0	0	0	0	0	0	12.7	0	0	0	5	0	0
56780		0	0	0	3.00324	26.5	0	0	0	0	0	0	2	0	0	0	0	1	0	0	0	0	0	0	0	1	0	0	0	8.16667	0	0
6830		0	0	0	2.33333	1	1	5	0	34.0959	4.96364	0	1.5	0	5.13717	0	0	1.98521	19.763	0	6.2813	0	0	97.5518	0	0	10.863	1.33333	0	1	2	2.7797
346637		0	0	0	0	0	0	0	0	0	0	0	0	0	0	0	1	0	0	0	0	0	0	0	0	0	0	0	0	0	0	0
956483		0	0	1	0	0	0	0	0	0	0	0	0	0	0	0	0	0	0	0	0	0	0	0	0	0	0	0	0	0	0	0
69679		0	0	0	1	0	0	0	0	6	0	0	0	0	0	0	0	0	3	0	0	0	0	4	0	0	3	0	0	0	0	0
882101		0	0	2	0	0	0	0	0	0	0	0	0	0	0	0	0	0	0	0	0	0	0	0	0	0	0	0	0	0	0	0
10091		0	0	0	0	1	0.5	0	0	0	0	0	0	0	0	0	0	0	0	0	0	0	0	0	0	0	0	0.05	0	0	0.027027	0
106678		0	0	0	0	0	0	0	0	0	0	0	0	0	0	0	0	0	0	0	0	0	0	0	0	0	0	0	0	0	0	0
283		2	40.538	7.83333	4.86667	89.2444	0	3.7	48.1607	0	1.4	26.7542	8.33333	1.25	0	0	4	4	0	0	0	0	32.2354	0	18.6094	7	0	1.4	37.0537	7.83333	3	0
257398		0	0.113399	0	0.030303	0	0	0	0.131911	0	0	0	1	0	0	0	0	2	0	0	0	0	0.0408333	0	0.0125	0	0	0	0.0271205	0	0	0
86237		0	0	0	1	0	0.5	1	0	0	3	0	0	0	0	0	0	0	0	0	0	0	0	0	0	0	0	0	0	0	0	0
76519		0	0	0	0	0	0	0	0	0	0	0	0	0.0155425	0	0	0	0	0	0	0	0	0	0	0	0	0	0	0	0	0	0
594675		0	0	0	0	0	0	1	0	0	0	0	0	0	0	0	0	0	0	0	0	0	0	0	0	0	0	1	0	0	0	0
46730		0	0	0	0	0	0	0	0	11.6601	0	0	0	0	3.5542	0	0	0	1.3599	0	4.34212	0	0	28.5309	0	0	4.57492	0	0	0	0	0.259901
419561		0	0	0	0	0	0	0	0.00204499	0	0	0	0	0	0	0	0	0	0	0	0	0	0	0	0	0	0	0	0	0	0	0
283495		0.0869565	0	0	0	70.8333	0	0	0	0	0	0	0	0	0	0	3	0	0	0	0	0	0	0	0	0	0	0	0	0	0	0
550538		0	0.285344	0.087619	0.107099	1.2524	0	0	1.35951	0	0	0.387892	0	0	0	0	0.134387	0	0	0	0	0	0.1	0	0.274286	0.0990338	0	0.186335	0.287608	0.555119	0	0
7742		74.1476	71.5727	14.5995	727.519	261.594	306.615	864.843	173.638	1353.42	615.533	3899.06	49.5452	9.88718	5428.31	8169.15	81.6905	121.673	1946.2	29.5	11398.7	32.439	616.879	8858.66	5918.02	14.647	1219.07	365.827	105.563	21.9384	356.949	25.0202
163517		0	0	0	0	4	0	0	0	0	0	0	0	0	0	0	9	0	0	0	0	0	0	0	0	0	0	0	0	0	0	0
121406		0	0	0	0	0	0	0	0	0	0	0	0	0	0	0	0	0	0	0	0	0	0	0	0.128853	0	0	0	0	0	0	0
264052		0	0	0	0	0	0	0	0	0	0.0077821	0	0	0	0	0	0	0	0	0	0	0	0	0	0	0	0	0	0	0	0	0
315487		0	0	0	0	0	0	0	0	0	0	0	0	0	0	0	0	0	0.024	0	0	0	0	0	0	0	0	0	0	0	0	0
160462		0	0	0	0	0	0	0	0	0	0	0	0	0	0	0	0	0.25	0	0	0	0	0	0	0	0	0	0	0	0	0	0
7683		0	0	0	0	0	0	0	0	2	0	0	0	0	0	0	0	0	0	0	0	0	0	0	0	0	0	0	0	0	0	0
211880		0	0	0	0	0	0	0	0	0	0	0	0	0	0	0	0	0	0	0	0	0	0	0	0	0	0	0	0	0.1	0	0
174951		2	18.7872	4	12.6742	87.5833	0.333333	9.33333	12.6417	0	5.2	53.2787	4	0	0	0	3	4.33333	0	0	0	0	9.66191	0	4.01467	6.5	0	3.2	12.6132	4	3.7	0
1075418		0	0	0	0	0	0	0	0	0	0	0	0	0	0	0	0	0	0	0	0	0	0	0	0	0	0	0	0	1	0	0
7638		1.66667	1.33333	1	87.3041	13.6667	47.1333	102.833	0.333333	12.5435	74.1333	1.66667	6.5	0	1.13315	0	4.2381	3	7.0099	0	0.193768	0	0	9.57491	0.666667	0	17.5099	35.2667	0.333333	1	42.1667	2.0099
926817		0	0	0	0	0	0	0	0	0	0	0	0	0	0	0	0	0	0.072	0	0	0	0	0	0	0	0	0	0	0	0	0
101153		0	0	0	0	0	0	0	0	0	0.0116732	0	0	0	0	0	0	0	0.034101	0	0	0	0	0	0	0	0	0	0	0	0.166667	0
999235		0	0	0	0	0	0	0	0	0	0	0	0	0	0	0	0	0	0	0	0	0	0	0	0	0	0.004	0	0	0	0	0
75329		0	0	0	0	0	0	0	0	0	0	0	0	0	0	0	0	0	0	0	0	0	0	0	0.00404858	0	0	0	0	0	0	0
157925		0	0.0199206	0	0	0	0	0	0.0278571	0	0	0	0	0	0	0	0	0	0	0	0	0	0	0	0.00396825	0	0	0	0	0	0	0
265669		0.785714	0.333333	0	0	0.191667	0	0	0.715909	0	0	0	1.06667	0.333333	0	0	0	0.5625	0	0	0	0	0	0	0	0	0	0	0	0	0	0
315410		0	0	0	0	0	0	0	0	0	0	0	0	0	0	0	0	0	0	0	0	0	0.0117647	0	0	0	0	0	0	0	0	0
8010		0	0	0	2	0	2	3.25	0	0	0.5	0	0	0	0	0	0	0	0.25	0	0	0	0	0	0	0	0	2.25	0	0	0	0
26339		0	0	0	0.5	0	0	0.5	0	0	0	0	0	0	0	0	0	0	0	0	0	0	0	1.5	0	0	0	0	0	0	0	0
680125		0	0	0	0	0.380952	0	0	0	0	0	0	0	0	0	0	0.5	0	0	0	0	0	0	0	0	0	0	0	0	0	0	0
321122		0	0	0	0	0	0	0	0	0	0	1	0	0	0	0	0	0	0	0	0	0	0	0	0	0	0	0	0	0	0	0
129192		0	0	0	0	0	0	0	0	0	0	0	0.5	1	0	0	0	0	0	0	0	0	0	0	0	0	0	0	0	0	0	0
542468		0	0	0.333333	0	2.5	0	0	0	0	0	0	33.25	3.16667	0	0	0	0	0	0	0	0	0	0	0	0	0	0	0	0	0	0
272558		0	5.33333	0	0	7.5	0	0	6.69134	0	0	1	1	0	0	0	0	2.66667	0	0	0	0	2.38095	0	1	0.5	0	0	1.04762	0.5	0	0
58290		0	1	0	0	0	0	0	0	0	0	0	0	0	0	0	0	1.5	0	0	0	0	1	0	0	0	0	0	0	0	0	0
106229		0	0	0	0	0	0	0	0	2	0	0	0	0	0	0	0	0	0	0	0	0	0	0	0	0	0	0	0	0	0	0
1084204		0	0	0	0	0	0	0	0.008	0	0	0	0	0	0	0	0	0	0	0	0	0	0	0	0	0	0	0	0	0	0	0
515207		0	0.0474645	0	0	0	0	0	0.0609863	0	0	0.00724638	0	0	0	0	0	0	0	0	0	0	0.0384211	0	0.0347577	0	0	0	0.0319302	0	0	0
40219		0	0	0	0	0	0	0	0	0	0	0	0	0	0	0	0	0	0	0	0	0	0	0	0	0	0	0	0	0	0.142857	0
634497		0	0	0	3	5	0	2	0	0	1	0	1	0.333333	0	0	0	0.2	0	0	0	0	0	0	0	0	0	1	0	3	4	0
872509		0	0	0	0	0	0	0	0	0	0	0	0	0	0	0	0	0	0	0	0	0	0	0	0	0	0.004	0	0	0	0	0
299750		0	0	0	0.166667	0	0	2	0	1.5	0	0	0	0	0	0	0	0	1	0	0	0	0	1	1	0	4	0	0	0	0	0
539002		0	4.73021	1	1	2	0	1	12.1429	0	0	3	2.5	0	0	0	0	0	0	0	0	0	4	0	0	0	0	0	1	1	0	0
795489		0	0	0	0	0	0	0	0	0	0.45	0	0	0	0	0	0	0	0	0	0	0	0	0	0	0	0	0	0	0	0	0
205914		0.5	0	0	0	4.41667	0	0.5	0	0	0	0	4.86667	1	0	0	0	2	0	0	0	0	0	0	0	3	0	1	0	1.5	0	0
8015		0	0	0	12.3333	7.5	13	21.5	0	29.5536	21.1167	12.2869	0	0	4.06206	3	4	3.52381	6.56179	0	9.57207	0	5.94737	57.1046	76.2485	1.5	11.9133	12.1667	0	0	7.5	0.184406
98350		0	0	0	1.33333	0	0	0.333333	0	0	0	0	0	0	0	0	0	0	0	0	0	0	0	0	0	0	0	3	0	0	0	0
5094		1	0	0	1	0	0	0	3	0	1	0	0	0	0	0	0	1	0	0	0	0	10	0	0	1	0	0	0	0	0	0
161569		0	0	0	5	0	1	4	0	0	5	0	0	0	0	0	0	0	0	0	0	0	0	0	0	0	0	0	0	0	1	0
743588		0	0	0	0	0	0	0	0	0	0	0	0	0	0	0	0	18.5	0	0	0	0	0	0	0	0	0	0	0	0	0	0
498340		0	0	0	0.5	0	0	0	0	0	0	0	0	0	0	0	0	0	0	0	0	0	0	0	0	0	0	0	0	0	0	0
70863		1	0	3	2	10.3333	0	0	0	0	8.25	0.5	4.16667	2	0	0	0.5	2.5	0	0	0	0	0	0	1	2	0	1	0	7.06667	0	0
448082		0	0	0.0232558	0	0	0	0	0	0	0	0	0	0	0	0	0	0	0	0	0	0	0	0	0	0	0	0	0	0	0	0
3537		0	0	0	0	0	0	0	0	0	0	0	0	0	0	0	0	0	0	0	0	0	0	0	0	0	0	0	0	0	0	0
27843		0	0	0	0	0	0	0	0	0	0	0	0	0	0	0	0	0	8	0	0	0	0	0	0	0	0	0	0	0	0	0
4821		0	0	0	0	0	0	0	2	0	0.0344828	0	0	0	0	0	0	0	0	0	0	0	0	0	0	0	0	0	0	0	0	0
699034		0.142857	0	0	0	0.290909	0	0	0	0	0	0	3.33571	0.5	0	0	0	1.07341	0	2	0	0	0	0	0	0.222222	0	0	0	0.803968	0.125	0
284016		2	2	17.5	8.00647	155	1	15.1667	4	0	1	3	6.5	0	0	0	8.25	5.66667	0	0	0	0	1	0	1	29	0	4	3	16.8333	9.5	0
1050629		0	0	0	0	0	0	0	0	0	0.004	0	0	0	0	0	0	0.00796813	0	0	0	0	0	0	0	0	0	0	0	0	0	0
948		0	0	0	0.00647249	1	0	0	0	0	0	0	3	0	0	0	0	0	0	0	0	0	0	0	0	0	0	0	0	0	0	0
8239		0	0	0	0	0	0	0	0	0	0	0	0	0	0	0	0	0	0	0	0	0	0	0	2	0	0	0	0	0	0	0
1042530		0	0	0	0	0	0	0	0.0116884	0	0	0	0	0	0	0	0	0	0	0	0	0	0	0	0	0	0	0	0	0	0	0
515210		0	0.0434962	0	0	0	0	0	0.0738328	0	0	0.00724638	0	0	0	0	0	0	0	0	0	0	0.0539126	0	0.0520767	0	0	0	0.0362592	0	0	0
226		43.5	1	22.5	5	47.5	1.58333	2.91667	0	0	3.25	0	29.0833	3	0	0	3	128.042	0	0	0	0	0	0	0	14	0	4.33333	0	59.5	1.25	0
36586		0	0	0	0	0.166667	0	0	0	0	0	0	0.333333	0	0	0	0	0	0	0	0	0	0	0	0	0	0	0	0	0	0	0
539309		0	0	0	0	0	0	0	0	0	0	0	0	0	0	0	0	0	0	0	0	0	0	0	0	0	0	0	0	0.2	0	0
418368		0	0	0	3	0	0	0	0	0	0	0	0	0	0	0	0	0	0	0	0	0	0	0	0	0	0	1	0	0	0	0
261076		0	0	0	1	0	0	0	0	0	0	0	0	0	0	0	0	0	0	0	0	0	0	0	0	0	0	0	0	0	0.5	0
31103		0	0	0	0	0	0	0	0	0	0	0	0	0	0	0	0	0	0	0	0	0	1	0	0.0111111	0	0	0	0	0	0	0
336770		0	0	0	0	0	0	0	0	0	0	0	0	0	0	0	0	0	0	0	0	0	0.0909091	0	0	0	0	0	0	0	0	0
393133		0.285714	0.166667	0	0	0.525	0	0	0.469877	0	0	0	0.352381	0	0	0	0	0.0625	0	0	0	0	0	0	0	0	0	0	0	0.125	0	0
693921		0	0	0	1	0	1	1	0	1	2	0	1	0	0	0	0	2	0	0	0	0	0	0	0	0	1	0	0	0	0	0
10035		0	0	0	0	0	0	0	0	0	0	0	0	0	0	0	0	0	0	0	0	0	0	0	0	0	0.333333	0.125	0	0	0	0
940615		0	0	1	0.333333	12	0.833333	1	0	0	0	0	0	0	0	0	0	0	0	0	0	0	0	0	0	3	0	0	0	3	0	0
162171		2	0	1	1	21.5	1	3	2.5	0	0	0	4.01111	0.433333	0	0	3	12	0	0	0	0	0	0	0	5.375	0	0.333333	0	14.1667	0	0
154961		0	0	0	0.142857	0	0	0	0	0	0	0	0	0	0	0	0	0	0	0	0	0	0	0	0	0	0	0	0	0	0	0
6953		0	0	0	0	0	0	0	0	0	0	0	0	0	0	0	0	0	0	0	0	0	0	0	0	0	1	0	0	0	0	0
1127567		0	0	0	0.00101112	0	0	0	0	0	0	0	0	0	0	0	0	0	0	0	0	0	0	0	0	0	0	0	0	0	0	0
7968		0	0	0	0	0.5	0	0	0	0	0	0	0	0	0	0	0	0	0	0	0	0	0	0	1	0	0	0	0	0	0	0
5808		1	0	0	3	0	0	0	0	0	0	0	3	0	0	0	0	1	0	0	0	0	0	0	0	0	0	0	0	0.0833333	0	0
478434		0	0.0588235	0.125	0.225	1.09557	0.0625	0.346324	0	0	0	0.0588235	0.102302	0	0	0	0	0.263361	0	0	0	0	0	0	0	0.1875	0	0.1625	0	0	0.121324	0
307060		0	0	0	0	0	0	0	0	0	0	0	0	0	0	0	0	0	0	0	0	0	0	0	0	0	0	0.047619	0	0	0	0
426355		0	1.16667	8.5	7.5	116.936	1	11.2922	1	0	5.5	3.2	2.5	0	0	0	7.5	7	0	0	0	0	4	0	1	11	0	4	2	3.66667	6.33333	0
472152		0	0	0	1.07143	0	1	0	0	0	0	0	0	0	0	0	0	0	0	0	0	0	0	0	0	0	0	1	0	0	1	0
116123		0	0	0	0	0	0	1	0	1	0	0	0	0	0	0	0	0	0	0	0	0	0	2	0	0	2	0	0	0	0	0
6604		0	0	0	1	0	0	0	0	5	0.0153846	0	0	0	0	0	0	0	7.5	0	2	0	0	5	0	0	11	0.204274	0	0	0.0303309	1
1090462		0	0	0	0	0	0	0	0	0	0	0	0	0	0	0	0	0	0	0	0	0	0.00395257	0	0	0	0	0	0	0	0	0
1916		0	0	0	0	1.3	0	0	0	0	0	0	0	1	0	0	0	0	0	0	0	0	0	0	0	0	0	0	0	0.125	0	0
4232		0	0	0	0	0	0	1	0	0	0	0	0	0	0	0	0	0	0	0	0	0	0	0	0	0	0	0	0	0	0	0
4568		0	0	0	0.0120482	0	0	0	0	0	0	0	0	0	0	0	0	0	0	0	0	0	0	0	0	0	0	0	0	0	0.012987	0
424554		0.833333	0	0	1	1	1	1.42424	0	4.46912	1	0	0	1	1.33198	0	0	0	0.676568	0	4.18266	0	0	16.4577	0	0	0.609901	1	0	0	0	0.00990099
36866		0	0.00322928	0	0	0	0	0	0.0567707	0	0	1	0	0	0	0	0	0	0	0	0	0	0.1	0	1.16667	0	0	0	0.5	0	0	0
34553		0	0	0	0.0625	0	0	0	0	0	0	0	0	0	0	0	0	0	0	0	0	0	0	0	0	0	0	0	0	0	0	0
45276		0	0	0	0	0	0	0	0	0	0	0	0	0	0	0	0	0	0	0	0	0	0.00398406	0	0	0	0	0	0	0	0	0
[truncated: 18,065 more rows]
